# Supplementary material for: Ag(i) and Cu(i) cyclic-triimidazole coordination polymers: revealing different deactivation channels for multiple room temperature phosphorescences
Source: Royal Society of Chemistry journal article supplement (doi:10.1039/d0qi01377c), 2020-12-21
Supplement: d0qi01377c1.pdf [file d0qi01377c1.pdf]

## SUPPORTING INFORMATION

### Ag(I) and Cu(I) cyclic-triimidazole coordination polymers: revealing different deactivation channels for multiple room temperature phosphorescences

Daniele Malpicci,<sup>a</sup> Elena Lucenti,<sup>b</sup> Alessandra Forni,<sup>\*b</sup> Daniele Marinotto,<sup>b</sup> Andrea Previtali,<sup>ab</sup> Lucia Carlucci,<sup>a</sup> Pierluigi Mercandelli,<sup>a</sup> Chiara Botta,<sup>c</sup> Stefania Righetto<sup>a</sup> and Elena Cariati<sup>\*ab</sup>

<sup>a</sup> Department of Chemistry, Università degli Studi di Milano and INSTM RU, via Golgi 19, 20133 Milano, Italy. <sup>b</sup> Institute of Sciences and Chemical Technologies "Giulio Natta" (SCITEC) of CNR, via Golgi 19, 20133 Milano, Italy. <sup>c</sup> Institute of Sciences and Chemical Technologies "Giulio Natta" (SCITEC) of CNR, via Corti 12, 20133 Milano, Italy.

#### Table of Contents

|                                                                                                                                                 |           |
|-------------------------------------------------------------------------------------------------------------------------------------------------|-----------|
| <b>1. Experimental details</b> .....                                                                                                            | <b>2</b>  |
| 1.1 General information .....                                                                                                                   | 2         |
| 1.2 Synthesis of 1D [Ag(TT)I] <sub>n</sub> (1-Ag).....                                                                                          | 2         |
| 1.3 Synthesis of 3D [Ag(TT)Cl] <sub>n</sub> (2-Ag).....                                                                                         | 2         |
| 1.4 Synthesis of 3D [Ag <sub>3</sub> (TT) <sub>4</sub> ] <sub>n</sub> (NO <sub>3</sub> ) <sub>3n</sub> ·6nH <sub>2</sub> O (3-Ag) .....         | 2         |
| 1.5 Crystal Structure Analysis .....                                                                                                            | 2         |
| 1.6 Computational details.....                                                                                                                  | 3         |
| <b>2. Crystal structures</b> .....                                                                                                              | <b>4</b>  |
| <b>3. Photophysical Studies</b> .....                                                                                                           | <b>6</b>  |
| 3.1 1D Coordination Polymer [Ag(TT)I] <sub>n</sub> (1-Ag).....                                                                                  | 6         |
| 3.2 1D Coordination Polymer [Cu(TT)I] <sub>n</sub> (1-Cu).....                                                                                  | 11        |
| 3.3. 3D Coordination Polymer [Ag(TT)Cl] <sub>n</sub> (2-Ag).....                                                                                | 13        |
| 3.4. 3D Coordination Polymer [Cu(TT)Cl] <sub>n</sub> (2-Cu).....                                                                                | 13        |
| 3.5 3D Coordination Polymer [Ag <sub>3</sub> (TT) <sub>4</sub> ] <sub>n</sub> (NO <sub>3</sub> ) <sub>3n</sub> ·6nH <sub>2</sub> O (3-Ag) ..... | 14        |
| <b>4. Theoretical studies</b> .....                                                                                                             | <b>17</b> |
| 4.1. 1-Ag, 1-Cu .....                                                                                                                           | 17        |
| 4.2. 2-Ag, 2-Cu and 3-Ag .....                                                                                                                  | 32        |
| <b>5. References</b> .....                                                                                                                      | <b>63</b> |

# 1. Experimental details

## 1.1 General information

All reagents and solvents were purchased from chemical suppliers and used without further purification unless otherwise stated. Triimidazo[1,2-*a*:1',2'-*c*:1'',2''-*e*][1,3,5]triazine (**TT**) [S1], [Cu(TT)]<sub>n</sub> (**1-Cu**) [S2], **TTI** and **TTCo** [S3] have been prepared according to literature procedures.

UV-Visible spectra were collected by a Shimadzu UV3600 spectrophotometer. Absolute photoluminescence quantum yields were measured using a C11347 (Hamamatsu Photonics K.K). Steady state emission and excitation spectra and photoluminescence lifetimes were obtained using both a FLS 980 (Edinburg Instrument Ltd) and a Nanolog (Horiba Scientific) spectrofluorimeter composed of a iH320 spectrograph equipped with a Synapse QExtra charge-coupled device. The steady state measurements were recorded by excitation with a monochromated 450 W Xenon arc lamp and the spectra are corrected for the instrument response. Phosphorescence spectra are obtained with a PPD-850 single photon detector module with time-gated separation by exciting with a pulsed Xe lamp. Photoluminescence lifetime measurements were performed using: Edinburgh Picosecond Pulsed Diode Laser EPL-375, EPLED-300, (Edinburg Instrument Ltd) and microsecond flash Xe-lamp (60W, 0.1÷100 Hz) with data acquisition devices time correlated single-photon counting (TCSPC) and multi-channel scaling (MCS) methods, respectively. Nanolog TCSPC measurements were performed using DeltaTime series DD-300 DeltaDiode and a DD-405L DeltaDiode Laser, with a PPD-850 single photon detector module and are analysed with the instrument software DAS6. Average lifetimes are obtained as  $\tau_{av} = \sum \frac{A_i \tau_i^2}{A_i \tau_i}$  from bi-exponential or three-exponential fits. Low temperature measurements are performed in a quartz dewar by immersion of the sample in liquid nitrogen or with a variable temperature liquid nitrogen cryostat Oxford DN1704.

Elemental analyses were carried out at the Microanalytical Laboratory of the University of Milan with a PerkinElmer 2400 instrument.

Solvothermal syntheses were performed in a sealed 20 mL Teflon-lined reactor, heated (5 °C/min rate) in an oven at 120 °C for 36 h and slowly (0.1 °C/min rate) cooled to 35 °C.

## 1.2 Synthesis of 1D [Ag(TT)]<sub>n</sub> (**1-Ag**)

AgI (55 mg, 0.234 mmol) is added to a solution of N,N-dimethylformamide (DMF, 5 mL) and KI (20 mg, 0.4 wt%) at 25 °C in the dark. After 15 minutes the resulting transparent solution is transferred into a vial. **TT** (47 mg, 0.238 mmol) dissolved in acetonitrile (CH<sub>3</sub>CN, 3 mL) is added to this solution. The vial is kept closed at 25 °C in the dark producing after few days a white powder which is filtered and dried over filter paper.

Alternatively, **TT** (11 mg, 0.056 mmol) dissolved in CH<sub>3</sub>CN (2 mL) is added to a vial containing 4 mL of a saturated aqueous solution of AgI in KI. The vial is kept closed at 25 °C in the dark producing after few days needle-shaped crystals suitable for X-ray diffraction analysis.

Anal. Calcd. for C<sub>9</sub>H<sub>6</sub>AgIN<sub>6</sub> (%): C, 25.03; H, 1.17; N, 19.46. Found: C, 25.39; H, 1.29; N, 19.63.

## 1.3 Synthesis of 3D [Ag(TT)Cl]<sub>n</sub> (**2-Ag**)

In a Teflon beaker, solid AgCl (14 mg, 0.098 mmol) and **TT** (21 mg, 0.106 mmol) are suspended in a CH<sub>3</sub>CN/DMF (3 mL/1 mL) solution. The reaction is heated under solvothermal conditions according to the ramp described in the General Information section. An unknown yellow solid is filtered from the reaction mixture. The resulting yellow solution is left for crystallization at 25 °C. Colorless crystals of **2-Ag** start to appear after few weeks.

## 1.4 Synthesis of 3D [Ag<sub>3</sub>(TT)<sub>4</sub>]<sub>n</sub>(NO<sub>3</sub>)<sub>3n</sub>·6nH<sub>2</sub>O (**3-Ag**)

A solution of AgNO<sub>3</sub> (17 mg, 0.100 mmol) in ethanol (EtOH, 20 mL) is added to a beaker containing **TT** (20 mg, 0.101 mmol) dissolved in dichloromethane (CH<sub>2</sub>Cl<sub>2</sub>, 20 mL). The resulting mixture is stirred 16 h at 25 °C in the dark to give a white precipitate which is filtered and characterized as [Ag<sub>3</sub>(TT)<sub>4</sub>]<sub>n</sub>(NO<sub>3</sub>)<sub>3n</sub>·6nH<sub>2</sub>O (**3-Ag**) by X-ray powder diffraction (XRPD) and elemental analysis. Slow evaporation of the clear solution left at 25 °C in the dark afforded after few weeks colorless crystals of **3-Ag** suitable for single crystal X-ray diffraction analysis.

The same crystalline product can be obtained in a vial by slow diffusion of AgNO<sub>3</sub> (9.3 mg, 0.055 mmol) dissolved in ethanol (EtOH, 10 mL) into a dichloromethane solution (CH<sub>2</sub>Cl<sub>2</sub>, 10 mL) of **TT** (10 mg, 0.051 mmol). The vial is kept closed at 25 °C in the dark.

Anal. Calcd. for C<sub>37</sub>H<sub>39</sub>Ag<sub>3</sub>N<sub>27</sub>O<sub>15</sub> (%): C, 31.18; H, 2.76; N, 26.53. Found: C, 30.71; H, 2.87; N, 25.86.

## 1.5 Crystal Structure Analysis

Single-crystal X-ray diffraction data for the coordination networks **1-Ag**–**3-Ag** were collected at 150 K on a Bruker APEX II CCD area detector diffractometer, using graphite-monochromated Mo K $\alpha$  radiation ( $\lambda = 0.71073$  Å). A full sphere of reciprocal space was scanned by 0.5°  $\omega$  steps, collecting 2160 frames in six different regions of the reciprocal space. After

integration, an empirical absorption correction was made on the basis of the symmetry-equivalent reflection intensities measured [S4].

The structures were solved by direct methods (SIR 2014 [S5]) and subsequent Fourier synthesis; they were refined by full-matrix least-squares on  $F^2$  (SHELX 2014 [S6]) using all reflections. Weights were assigned to individual observations according to the formula  $w = 1/[\sigma^2(F_o^2) + (aP)^2 + bP]$ , where  $P = (F_o^2 + 2F_c^2)/3$ ;  $a$  and  $b$  were chosen to give a flat analysis of variance in terms of  $F_o^2$ . Anisotropic parameters were assigned to all non-hydrogen atoms. All the hydrogen atoms were clearly visible in difference-Fourier maps (except those of the disordered water molecules in **3-Ag**); however, they were eventually placed in idealized position and refined riding on their parent atom with an isotropic displacement parameter 1.2 times that of the pertinent parent atom.

In the structure of **3-Ag** the nitrate anion is disordered over the Wyckoff position 16c (site symmetry 3). One of the oxygen atoms lies on the threefold axis while the nitrogen atom and the other independent oxygen atom lay outside the axis, generating three images of the anion equally occupied. The overall site occupancy of the nitrate anion has been fixed in order to grant the electroneutrality of the structure. In the same structure, the oxygen atom of the water molecule shows a markedly prolate atomic displacement ellipsoid because of the large volume (32 Å<sup>3</sup>) of the cavity occupied. Any attempt to refine the water molecule as disordered over more than one position leads only to negligible improvements on the  $R$  factors at the expense of a significant increase of the number of refined parameters, and has been therefore discarded. The water content is in agreement with the results of elemental and thermogravimetric analyses.

The final difference electron density map showed no features of chemical significance, with the largest peaks lying close to the silver atoms.

Crystal data, data collection and refinement details of the structural analyses are summarized in Table S1, while a selection of geometric parameters for the three coordination networks are collected in Tables S2–S4. CCDC 2041933–2041935 contain the supplementary crystallographic data for **1-Ag–3-Ag**. These data can be obtained free of charge via <http://www.ccdc.cam.ac.uk/conts/retrieving.html>, or from the Cambridge Crystallographic Data Centre, 12 Union Road, Cambridge CB2 1EZ, UK; fax: (+44) 1223-336-033; or e-mail: [deposit@ccdc.cam.ac.uk](mailto:deposit@ccdc.cam.ac.uk).

## 1.6 Computational details

Computational studies have been performed on discrete models of the **1+3-Ag** coordination polymers and the Cu analogues **1-Cu** and **2-Cu** by using the Gaussian 16 suite of programs [S7]. The geometries of the 1-M and 2-M (M = Ag, Cu) model compounds have been optimized with proper constraints (see below) at the  $\omega$ B97X/def2-TZVP and  $\omega$ B97X/6-311++G(d,p) levels of theory for the Ag and the Cu compounds, respectively, starting from the X-ray fragments extracted from the respective crystal structures. The def2-TZVP basis set [S8] and the all-electron basis set for iodine were downloaded from the Basis Set Exchange site [S9], with the exponents of the s and p diffuse functions taken from the literature [S10]. The  $\omega$ B97X functional [S11] has been chosen in view of its optimal performance in treating the geometrical and electronic features of **TT** derivatives [S12], including  $\pi$ - $\pi$  interactions that play an important role in the photophysics of the present structures. In particular, it was previously verified [S12a] that other largely used functionals such as PBE0 are not able to provide stable  $\pi$ - $\pi$  stacked dimeric units of **TT**. On the other side, geometry optimization of **3-Ag** (lacking  $\pi$ - $\pi$  interactions in its crystal structure) was performed by adopting the PBE0 functional owing to the strong tendency of the four **TT** units of the complex to collapse into dimeric pairs during optimization if the  $\omega$ B97X functional is used. The same def2-TZVP basis set as adopted for **1-Ag** and **2-Ag** has been chosen. TDDFT calculations were performed for all compounds at the  $\omega$ B97X/def2-TZVP (Ag) and  $\omega$ B97X/6-311++G(d,p) (Cu) levels of theory. QTAIM analysis has been performed by the AIMAll program [S13]

## 2. Crystal structures

Table S1. Crystal data, data collection and refinement details for the silver coordination networks **1-Ag**, **2-Ag**, and **3-Ag**.

|                                                                                | [Ag(TT)I] <sub>n</sub> ( <b>1-Ag</b> )          | [Ag(TT)Cl] <sub>n</sub> ( <b>2-Ag</b> )          | [Ag <sub>3</sub> (TT) <sub>4</sub> ] <sub>n</sub> (NO <sub>3</sub> ) <sub>3n</sub> ·6nH <sub>2</sub> O ( <b>3-Ag</b> )                                                                                  |
|--------------------------------------------------------------------------------|-------------------------------------------------|--------------------------------------------------|---------------------------------------------------------------------------------------------------------------------------------------------------------------------------------------------------------|
| <i>Crystal data</i>                                                            |                                                 |                                                  |                                                                                                                                                                                                         |
| Chemical formula                                                               | C <sub>9</sub> H <sub>6</sub> AgIN <sub>6</sub> | C <sub>9</sub> H <sub>6</sub> AgClN <sub>6</sub> | C <sub>36</sub> H <sub>24</sub> Ag <sub>3</sub> N <sub>24</sub> (NO <sub>3</sub> ) <sub>3</sub> ·6H <sub>2</sub> O<br>= C <sub>36</sub> H <sub>36</sub> Ag <sub>3</sub> N <sub>27</sub> O <sub>15</sub> |
| <i>M<sub>r</sub></i>                                                           | 432.97                                          | 341.52                                           | 1410.53                                                                                                                                                                                                 |
| Crystal system                                                                 | monoclinic                                      | cubic                                            | cubic                                                                                                                                                                                                   |
| Space group                                                                    | <i>P</i> 2 <sub>1</sub> / <i>c</i> (No. 14)     | <i>P</i> $\bar{a}$ 3 (No. 205)                   | <i>I</i> $\bar{4}$ 3 <i>d</i> (No. 220)                                                                                                                                                                 |
| Temperature [K]                                                                | 150(2)                                          | 150(2)                                           | 150(2)                                                                                                                                                                                                  |
| <i>a</i> [Å]                                                                   | 13.858(2)                                       | 12.7192(4)                                       | 17.2491(7)                                                                                                                                                                                              |
| <i>b</i> [Å]                                                                   | 4.7312(7)                                       | 12.7192(4)                                       | 17.2491(7)                                                                                                                                                                                              |
| <i>c</i> [Å]                                                                   | 17.303(3)                                       | 12.7192(4)                                       | 17.2491(7)                                                                                                                                                                                              |
| $\alpha$ [°]                                                                   | 90                                              | 90                                               | 90                                                                                                                                                                                                      |
| $\beta$ [°]                                                                    | 105.388(2)                                      | 90                                               | 90                                                                                                                                                                                                      |
| $\gamma$ [°]                                                                   | 90                                              | 90                                               | 90                                                                                                                                                                                                      |
| <i>V</i> [Å <sup>3</sup> ]                                                     | 1093.8(3)                                       | 2057.69(19)                                      | 5132.2(6)                                                                                                                                                                                               |
| <i>Z</i>                                                                       | 4                                               | 8                                                | 4                                                                                                                                                                                                       |
| $\mu$ (MoK $\alpha$ ) [mm <sup>-1</sup> ]                                      | 4.650                                           | 2.202                                            | 1.226                                                                                                                                                                                                   |
| Crystal size [mm]                                                              | 0.305 × 0.045 × 0.030                           | 0.125 × 0.125 × 0.070                            | 0.200 × 0.200 × 0.160                                                                                                                                                                                   |
| <i>Data collection</i>                                                         |                                                 |                                                  |                                                                                                                                                                                                         |
| <i>T</i> <sub>min</sub> , <i>T</i> <sub>max</sub>                              | 0.331, 0.934                                    | 0.804, 0.857                                     | 0.742, 0.828                                                                                                                                                                                            |
| No. of measured reflections                                                    | 12349                                           | 48142                                            | 36683                                                                                                                                                                                                   |
| No. of independent reflections                                                 | 3516                                            | 1220                                             | 1422                                                                                                                                                                                                    |
| No. of observed reflections                                                    | 2515                                            | 1118                                             | 1361                                                                                                                                                                                                    |
| [ <i>I</i> > 2 $\sigma$ ( <i>I</i> )]                                          |                                                 |                                                  |                                                                                                                                                                                                         |
| <i>R</i> <sub>int</sub>                                                        | 0.0478                                          | 0.0215                                           | 0.0625                                                                                                                                                                                                  |
| <i>R</i> <sub><math>\sigma</math></sub>                                        | 0.0456                                          | 0.0056                                           | 0.0205                                                                                                                                                                                                  |
| (sin $\theta$ / $\lambda$ ) <sub>max</sub> [Å <sup>-1</sup> ]                  | 0.743                                           | 0.752                                            | 0.737                                                                                                                                                                                                   |
| <i>Refinement</i>                                                              |                                                 |                                                  |                                                                                                                                                                                                         |
| <i>R</i> [ <i>F</i> <sup>2</sup> > 2 $\sigma$ ( <i>F</i> <sup>2</sup> )]       | 0.0343                                          | 0.0160                                           | 0.0326                                                                                                                                                                                                  |
| <i>wR</i> ( <i>F</i> <sup>2</sup> )                                            | 0.0692                                          | 0.0435                                           | 0.0822                                                                                                                                                                                                  |
| <i>S</i>                                                                       | 0.962                                           | 1.053                                            | 1.319                                                                                                                                                                                                   |
| No. of reflections                                                             | 3516                                            | 1220                                             | 1422                                                                                                                                                                                                    |
| No. of parameters                                                              | 154                                             | 52                                               | 75                                                                                                                                                                                                      |
| No. of restraints                                                              | 0                                               | 0                                                | 5                                                                                                                                                                                                       |
| $\Delta\rho$ <sub>max</sub> , $\Delta\rho$ <sub>min</sub> (e Å <sup>-3</sup> ) | 2.145, -1.211                                   | 0.488, -0.428                                    | 0.517, -0.342                                                                                                                                                                                           |

Table S2. Bond distances [ $\text{\AA}$ ] and angles [ $^\circ$ ] for the coordination network  $[\text{Ag}(\text{TT})\text{I}]_n$  (**1-Ag**)

|                               |           |                                                          |             |           |          |
|-------------------------------|-----------|----------------------------------------------------------|-------------|-----------|----------|
| Ag1–N1                        | 2.319(3)  | N1–Ag1–I1                                                | 123.34(10)  | C4–C5–N4  | 105.1(3) |
| Ag1–I1                        | 2.8084(5) | N1–Ag1–I1 <sup>i</sup>                                   | 102.71(7)   | N5–C6–N6  | 113.6(3) |
| Ag1–I1 <sup>i</sup>           | 2.8682(5) | N1–Ag1–I1 <sup>ii</sup>                                  | 94.77(7)    | N5–C6–N4  | 128.9(3) |
| Ag1–I1 <sup>ii</sup>          | 2.9221(5) | N1–Ag1 $\cdots$ Ag1 <sup>i</sup>                         | 132.62(7)   | N6–C6–N4  | 117.5(3) |
| Ag1 $\cdots$ Ag1 <sup>i</sup> | 3.1591(5) | N1–Ag1 $\cdots$ Ag1 <sup>ii</sup>                        | 123.67(7)   | C8–C7–N5  | 112.3(3) |
| C1–C2                         | 1.354(5)  | I1–Ag1–I1 <sup>i</sup>                                   | 113.568(12) | C7–C8–N6  | 105.2(3) |
| C1–N1                         | 1.400(4)  | I1–Ag1–I1 <sup>ii</sup>                                  | 111.927(12) | N1–C9–N2  | 112.8(3) |
| C2–N2                         | 1.391(4)  | I1 <sup>i</sup> –Ag1–I1 <sup>ii</sup>                    | 109.584(16) | N1–C9–N6  | 129.9(3) |
| C3–N3                         | 1.299(4)  | Ag1 <sup>i</sup> $\cdots$ Ag1 $\cdots$ Ag1 <sup>ii</sup> | 96.975(18)  | N2–C9–N6  | 117.3(3) |
| C3–N4                         | 1.371(4)  | Ag1 <sup>i</sup> $\cdots$ Ag1–I1                         | 58.284(13)  | C9–N1–C1  | 104.1(3) |
| C3–N2                         | 1.391(4)  | Ag1 <sup>i</sup> $\cdots$ Ag1–I1 <sup>i</sup>            | 55.288(10)  | C9–N1–Ag1 | 135.1(2) |
| C4–C5                         | 1.353(5)  | Ag1 <sup>i</sup> $\cdots$ Ag1–I1 <sup>ii</sup>           | 130.801(16) | C1–N1–Ag1 | 119.4(2) |
| C4–N3                         | 1.393(5)  | Ag1 <sup>ii</sup> $\cdots$ Ag1–I1                        | 57.090(13)  | C9–N2–C3  | 123.3(3) |
| C5–N4                         | 1.389(4)  | Ag1 <sup>ii</sup> $\cdots$ Ag1–I1 <sup>i</sup>           | 130.428(16) | C9–N2–C2  | 106.6(3) |
| C6–N5                         | 1.297(4)  | Ag1 <sup>ii</sup> $\cdots$ Ag1–I1 <sup>ii</sup>          | 54.840(11)  | C3–N2–C2  | 130.0(3) |
| C6–N6                         | 1.374(4)  | Ag1–I1–Ag1 <sup>ii</sup>                                 | 67.621(9)   | C3–N3–C4  | 103.1(3) |
| C6–N4                         | 1.382(4)  | Ag1–I1–Ag1 <sup>i</sup>                                  | 66.875(9)   | C3–N4–C6  | 123.1(3) |
| C7–C8                         | 1.344(5)  | Ag1 <sup>ii</sup> –I1–Ag1 <sup>i</sup>                   | 109.584(16) | C3–N4–C5  | 105.5(3) |
| C7–N5                         | 1.386(4)  | C2–C1–N1                                                 | 111.5(3)    | C6–N4–C5  | 131.3(3) |
| C8–N6                         | 1.392(4)  | C1–C2–N2                                                 | 105.0(3)    | C6–N5–C7  | 103.6(3) |
| C9–N1                         | 1.305(4)  | N3–C3–N4                                                 | 114.1(3)    | C9–N6–C6  | 122.3(3) |
| C9–N2                         | 1.368(4)  | N3–C3–N2                                                 | 129.4(3)    | C6–N6–C8  | 105.3(3) |
| C9–N6                         | 1.384(4)  | N4–C3–N2                                                 | 116.4(3)    | C9–N6–C8  | 132.3(3) |
|                               |           | C5–C4–N3                                                 | 112.2(3)    |           |          |

Superscripts i–ii indicate atoms generated by the following symmetry operations: (i)  $-x, y + \frac{1}{2}, -z + \frac{1}{2}$  and (ii)  $-x, y - \frac{1}{2}, -z + \frac{1}{2}$ .

Table S3. Bond distances [ $\text{\AA}$ ] and angles [ $^\circ$ ] for the silver coordination network  $[\text{Ag}(\text{TT})\text{Cl}]_n$  (**2-Ag**)

|                     |            |                        |            |                         |            |
|---------------------|------------|------------------------|------------|-------------------------|------------|
| Ag1–N1              | 2.3544(10) | N1–Ag1–Cl1             | 117.31(2)  | C2–N2–C3 <sup>ii</sup>  | 131.01(10) |
| Ag1–Cl1             | 2.4562(5)  | N1–Ag1–N1 <sup>i</sup> | 100.62(3)  | C3–N2–C3 <sup>ii</sup>  | 122.25(10) |
| N1–C1               | 1.3956(15) | Ag1–N1–C1              | 119.43(7)  | N1–C3–N2                | 112.95(10) |
| N1–C3               | 1.3035(14) | Ag1–N1–C3              | 134.03(8)  | N1–C3–N2 <sup>iii</sup> | 129.47(10) |
| C1–C2               | 1.3596(16) | C1–N1–C3               | 104.17(9)  | N2–C3–N2 <sup>iii</sup> | 117.56(10) |
| C2–N2               | 1.3930(14) | N1–C1–C2               | 111.54(10) |                         |            |
| N2–C3               | 1.3700(13) | C1–C2–N2               | 104.83(10) |                         |            |
| N2–C3 <sup>ii</sup> | 1.3833(13) | C2–N2–C3               | 106.51(9)  |                         |            |

Superscripts i–iii indicate atoms generated by the following symmetry operations: (i)  $z, x, y$ ; (ii)  $-y + 1, z + \frac{1}{2}, -x + \frac{1}{2}$  and (iii)  $z - \frac{1}{2}, -x + 1, y - \frac{1}{2}$ .

Table S4. Bond distances [ $\text{\AA}$ ] and angles [ $^\circ$ ] for the coordination network  $[\text{Ag}_3(\text{TT})_4]_n(\text{NO}_3)_{3n} \cdot 6n\text{H}_2\text{O}$  (**3-Ag**)

|                      |          |                         |           |                         |          |
|----------------------|----------|-------------------------|-----------|-------------------------|----------|
| Ag1–N1               | 2.308(4) | N1–Ag1–N1 <sup>i</sup>  | 124.7(2)  | C2–N2–C3                | 106.2(4) |
| N1–C1                | 1.386(6) | N1–Ag1–N1 <sup>ii</sup> | 102.45(9) | C2–N2–C3 <sup>iii</sup> | 131.7(4) |
| N1–C3                | 1.304(6) | Ag1–N1–C1               | 119.2(3)  | C3–N2–C3 <sup>iii</sup> | 122.1(4) |
| C1–C2                | 1.358(7) | Ag1–N1–C3               | 134.3(3)  | N1–C3–N2                | 112.3(4) |
| C2–N2                | 1.394(6) | C1–N1–C3                | 105.3(4)  | N1–C3–N2 <sup>iv</sup>  | 129.7(4) |
| N2–C3                | 1.370(5) | N1–C1–C2                | 110.7(4)  | N2–C3–N2 <sup>iv</sup>  | 117.9(4) |
| N2–C3 <sup>iii</sup> | 1.373(5) | C1–C2–N2                | 105.5(4)  |                         |          |

Superscripts i–iv indicate atoms generated by the following symmetry operations: (i)  $-x + 1, -y + \frac{1}{2}, z$ ; (ii)  $y + \frac{1}{4}, -x + \frac{3}{4}, -z + \frac{1}{4}$ ; (iii)  $-y + 1, z + \frac{1}{2}, -x + \frac{1}{2}$  and (iv)  $-z + \frac{1}{2}, -x, y - \frac{1}{2}$ .

### 3. Photophysical Studies

#### 3.1 1D Coordination Polymer $[\text{Ag}(\text{TT})\text{I}]_n$ (**1-Ag**)

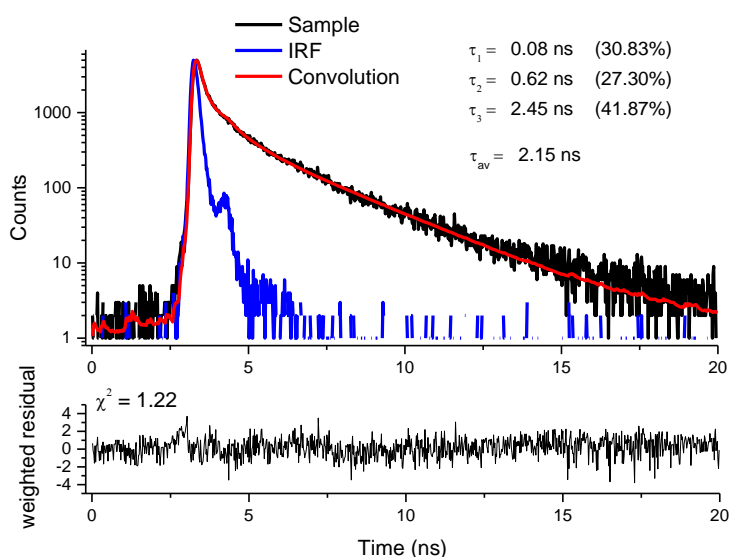

**Figure S1.** Lifetime measurement ( $\lambda_{\text{exc}}=374\text{nm}$ ,  $\lambda_{\text{em}}=400\text{ nm}$ ) of **1-Ag** at 298 K.  $\tau_{\text{av}} = 2.15\text{ ns}$

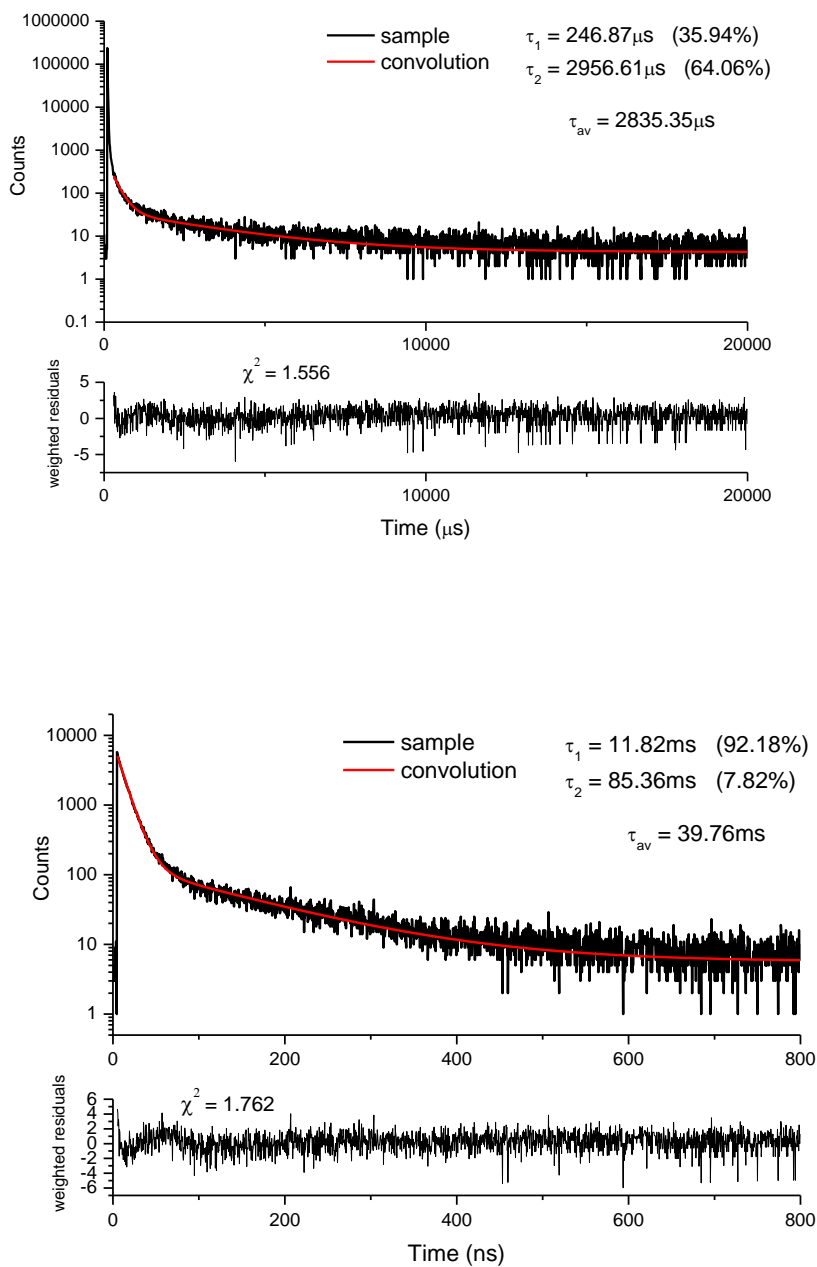

**Figure S2.** Lifetime measurement of **1-Ag** at 298 K. Upper panel:  $\lambda_{\text{exc}}=374\text{nm}$ ,  $\lambda_{\text{em}}=449\text{nm}$ ,  $\tau_{\text{av}} = 2835.35 \mu\text{s}$ . Lower panel:  $\lambda_{\text{exc}}=374\text{nm}$ ,  $\lambda_{\text{em}}=530\text{nm}$ ,  $\tau_{\text{av}} = 39.76 \text{ms}$

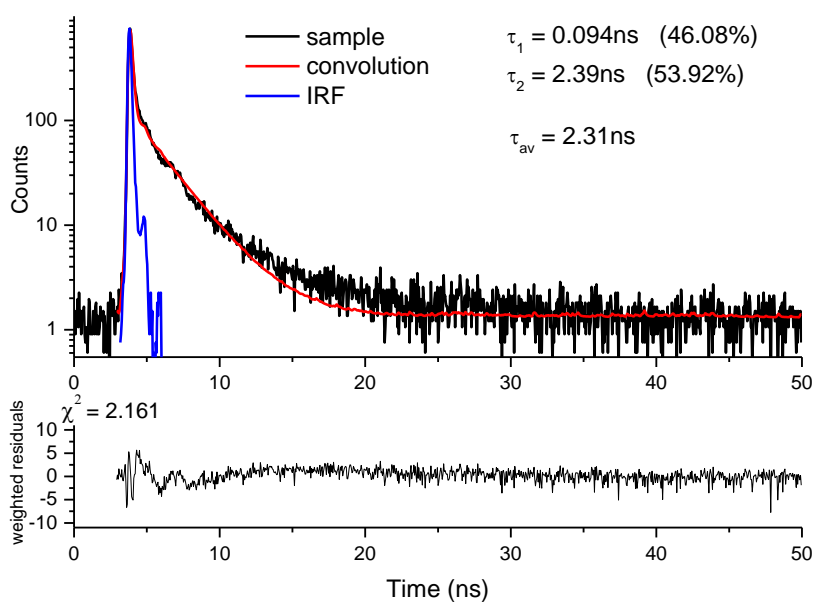

**Figure S3.** Lifetime measurement ( $\lambda_{\text{exc}}=374\text{nm}$ ,  $\lambda_{\text{em}}=424\text{nm}$ ) of **1-Ag** at 77 K.  $\tau_{\text{av}} = 2.31\text{ ns}$ .

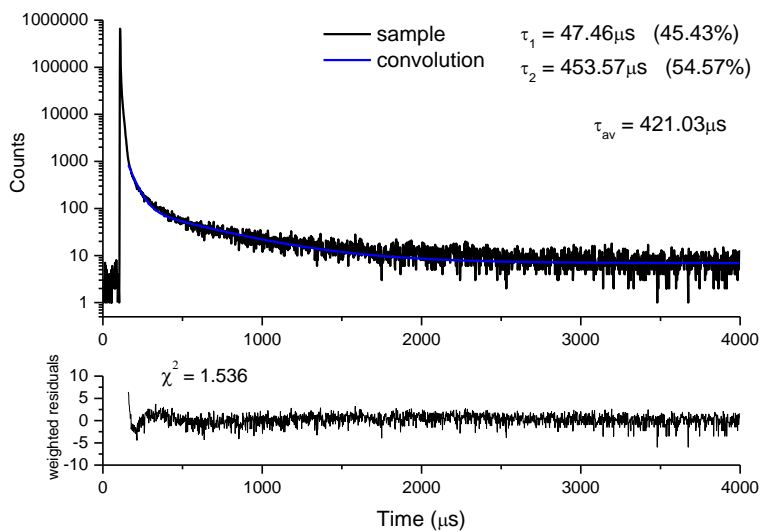

**Figure S4.** Lifetime measurement ( $\lambda_{\text{exc}}=374\text{nm}$ ,  $\lambda_{\text{em}}=449\text{nm}$ ) of **1-Ag** at 77 K.  $\tau_{\text{av}} = 421.03\ \mu\text{s}$ .



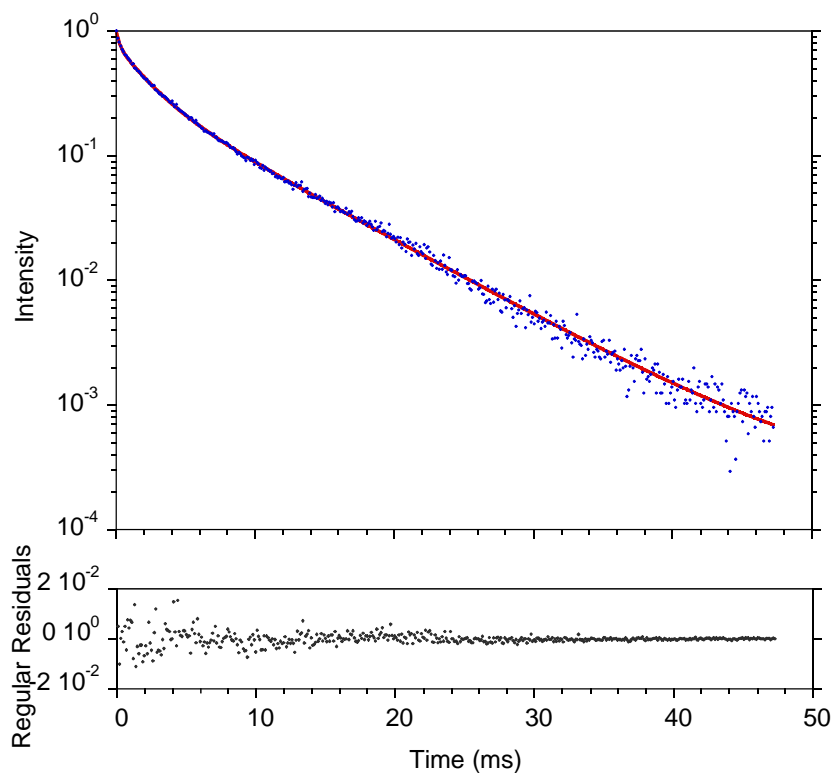

**Figure S5.** Lifetime measurement ( $\lambda_{\text{exc}} = 360\text{nm}$ ,  $\lambda_{\text{em}} = 449\text{nm}$ ) of **1-Ag** at 77 K.  $\tau_{\text{av}} = 5.67\text{ms}$ ;  $\tau_1 = 7.13\text{ ms}$  ( $A_1 = 32.52\%$ );  $\tau_2 = 2.08\text{ ms}$  ( $A_2 = 41.10\%$ );  $\tau_3 = 0.21\text{ ms}$  ( $A_3 = 26.37\%$ ); Adj. R-Square 0.99967

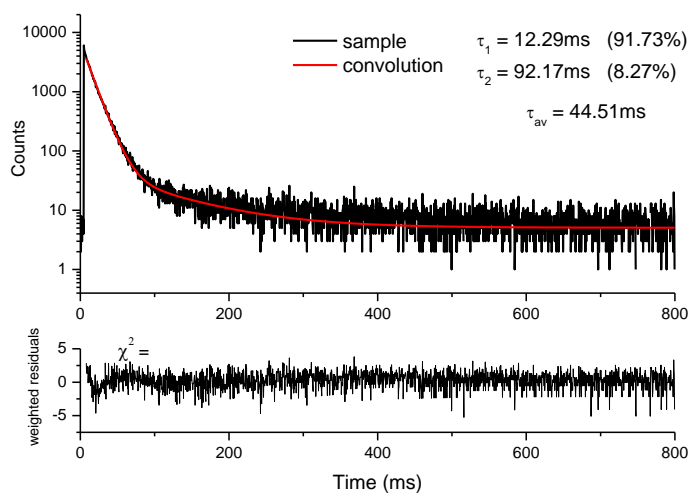

**Figure S6.** Lifetime measurement ( $\lambda_{\text{exc}} = 374\text{nm}$ ,  $\lambda_{\text{em}} = 530\text{nm}$ ) of **1-Ag** at 77 K.  $\tau_{\text{av}} = 44.51\text{ ms}$ .

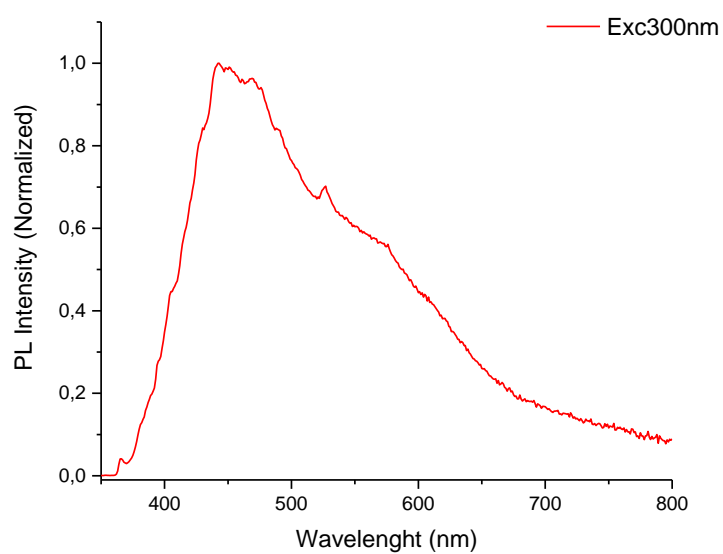

**Figure S7.** Normalized emission spectrum of **1-Ag** at 77 K,  $\lambda_{exc}=300\text{nm}$

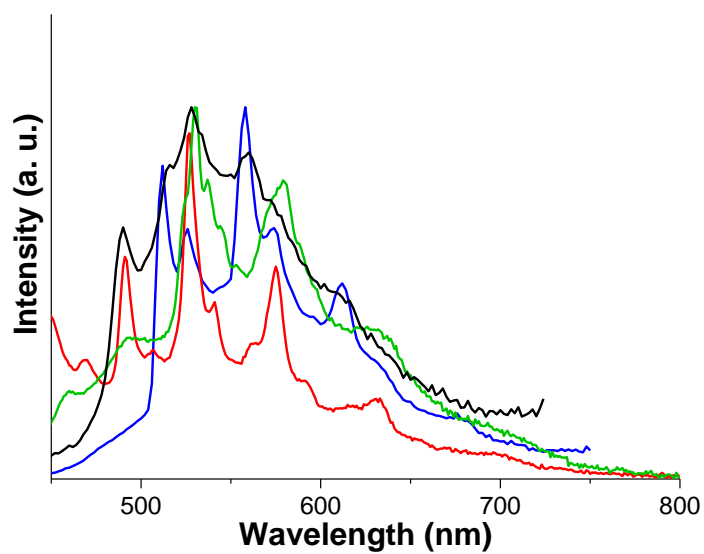

**Figure S8.** Comparison of the normalized emission band associated with **TT** organization in H-aggregates in crystals of **1-Ag** (red line); **1-Cu** (green line); **TTI** (blue line) and **TTCo** (black line).

### 3.2 1D Coordination Polymer [Cu(TT)I]<sub>n</sub> (1-Cu)

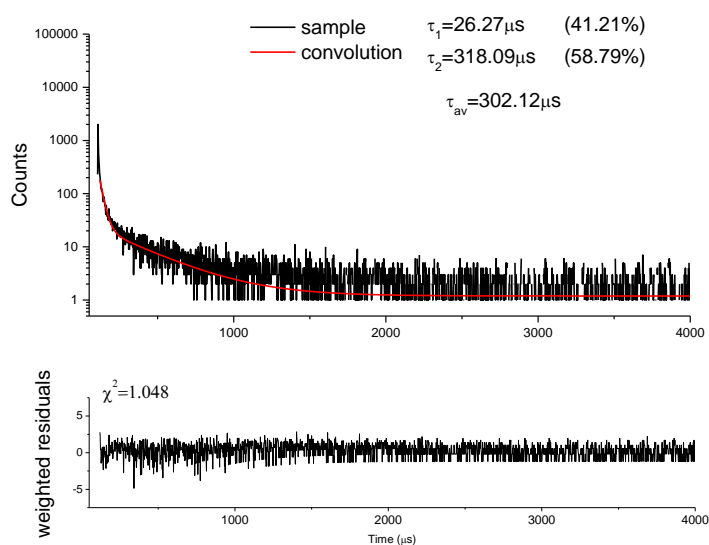

**Figure S9.** Lifetime measurement ( $\lambda_{\text{exc}}=390\text{nm}$ ,  $\lambda_{\text{em}}=530\text{nm}$ ) of **1-Cu** at 298 K.  $\tau_{\text{av}} = 302.12 \mu\text{s}$

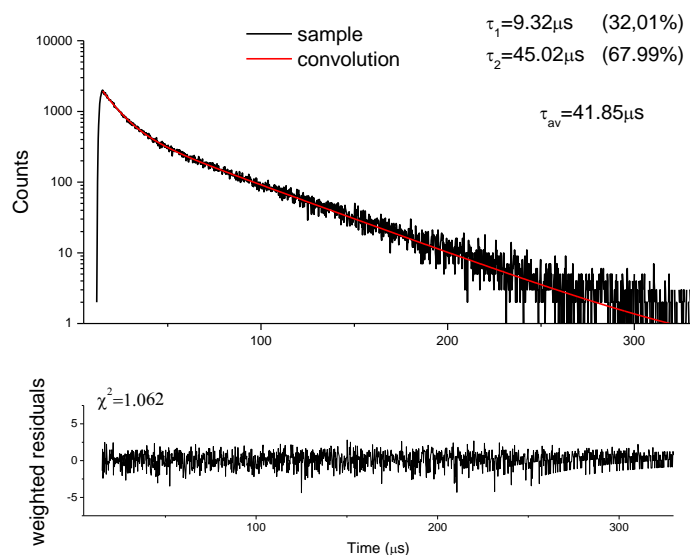

**Figure S10.** Lifetime measurement ( $\lambda_{\text{exc}}=300\text{nm}$ ,  $\lambda_{\text{em}}=550\text{nm}$ ) of **1-Cu** at 77 K.  $\tau_{\text{av}} = 41.85 \mu\text{s}$

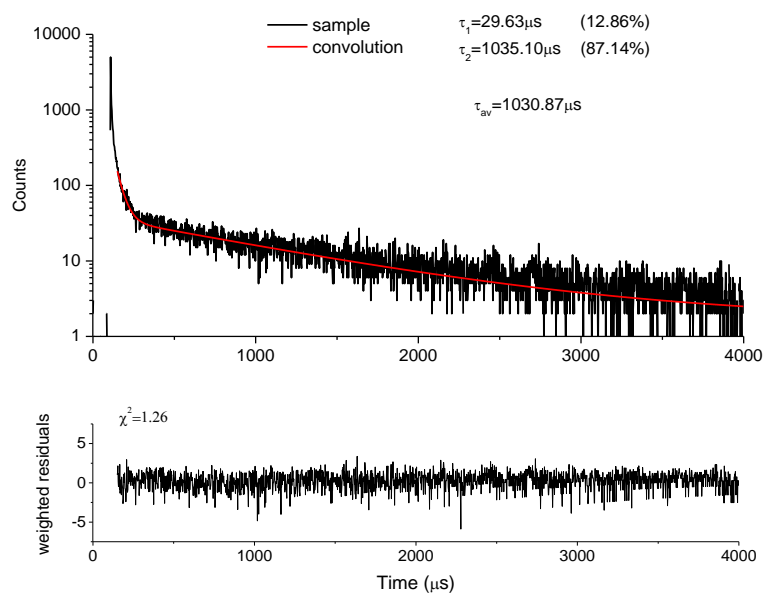

**Figure S11.** Lifetime measurement ( $\lambda_{\text{exc}}=390\text{nm}$ ,  $\lambda_{\text{em}}=530\text{nm}$ ) of **1-Cu** at 77 K.  $\tau_{\text{av}} = 1030.87 \mu\text{s}$

### 3.3. 3D Coordination Polymer [Ag(TT)Cl]<sub>n</sub> (2-Ag)

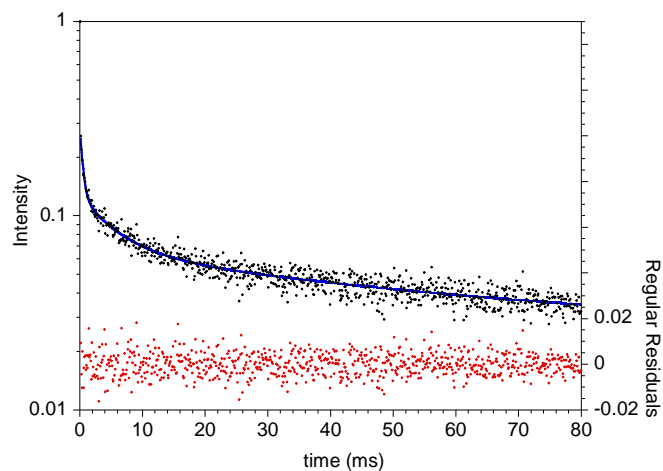

**Figure S12.** Phosphorescence decays of **2-Ag** ( $\lambda_{\text{exc}}=360\text{nm}$ ;  $\lambda_{\text{em}}=565\text{nm}$ , black points) at room temperature. Three exponential fit (solid line):  $\tau_{\text{av}}=47.7\text{ms}$  (0.47104ms (0.62), 5.55881 ms (0.23), 55.648ms (0.15), Adj. R-Square 0.95313).

### 3.4. 3D Coordination Polymer [Cu(TT)Cl]<sub>n</sub> (2-Cu)

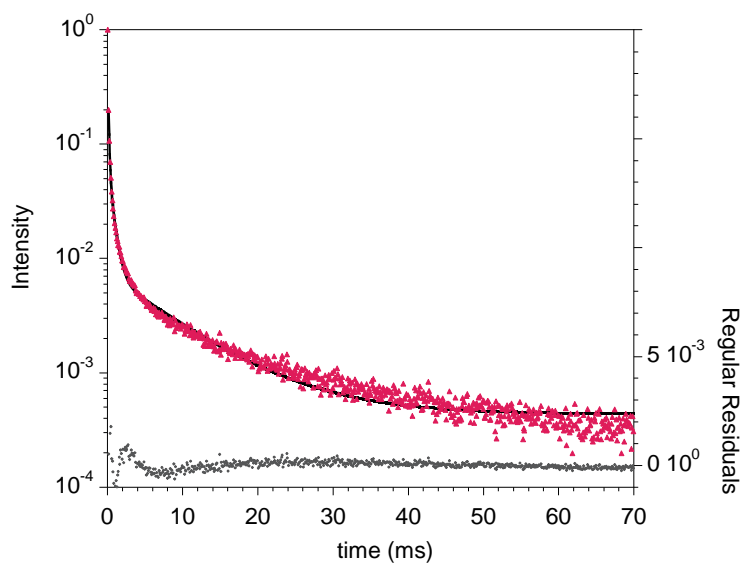

**Figure S13.** Phosphorescence decays of **2-Cu** ( $\lambda_{\text{exc}}=360\text{nm}$ ;  $\lambda_{\text{em}}=570\text{nm}$ , red triangles) at room temperature. Three exponential fit (solid line):  $\tau_{\text{av}}=3.56\text{ms}$  (0.11482ms (0.89), 0.67398 ms (0.10), 8.9524ms (0.01), Adj. R-Square 0.99933).

### 3.5 3D Coordination Polymer $[Ag_3(TT)_4]_n(NO_3)_{3n} \cdot 6nH_2O$ (3-Ag)

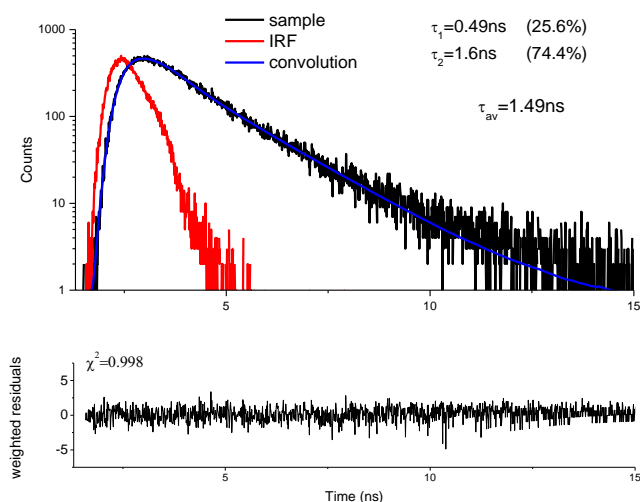

**Figure S14.** Lifetime measurement ( $\lambda_{exc}=300\text{nm}$ ,  $\lambda_{em}=410\text{nm}$ ) of **3-Ag** at 298 K.  $\tau_{av} = 1.49$  ns.

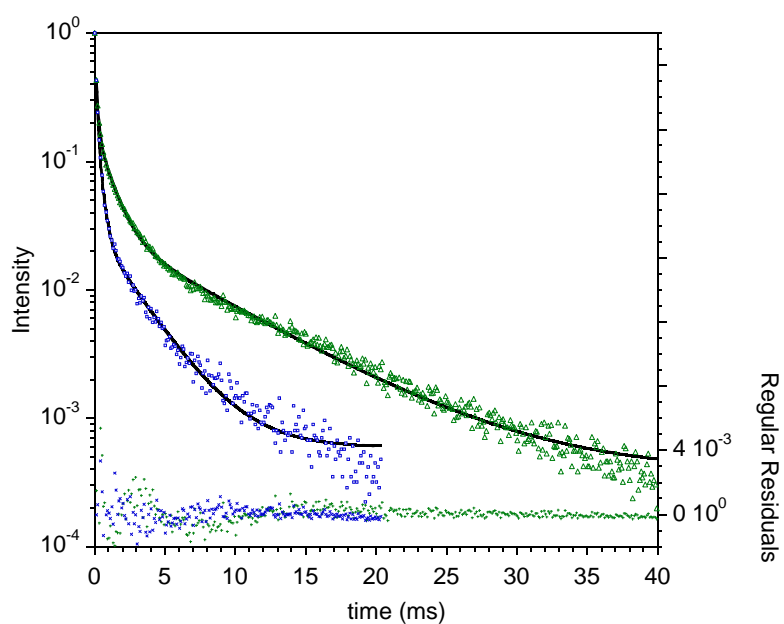

**Figure S15.** Phosphorescence decays of **3-Ag** ( $\lambda_{exc}=300\text{nm}$ ;  $\lambda_{em}=520\text{nm}$ , green points;  $\lambda_{em}=620\text{nm}$ , blue points) at room temperature. Three exponential fits (solid lines):  $\lambda_{em}=520\text{nm}$ ,  $\tau_{av}=3.41\text{ms}$  (0.1322ms (0.81), 1.022 ms (0.16), 7.029ms (0.03), Adj. R-Square 0.99954).  $\lambda_{em}=620\text{nm}$ ,  $\tau_{av}=1.04\text{ms}$  (2.648ms (0.03), 0.10686 ms (0.72), 0.32194ms (0.25) Adj. R-Square 0.99971).

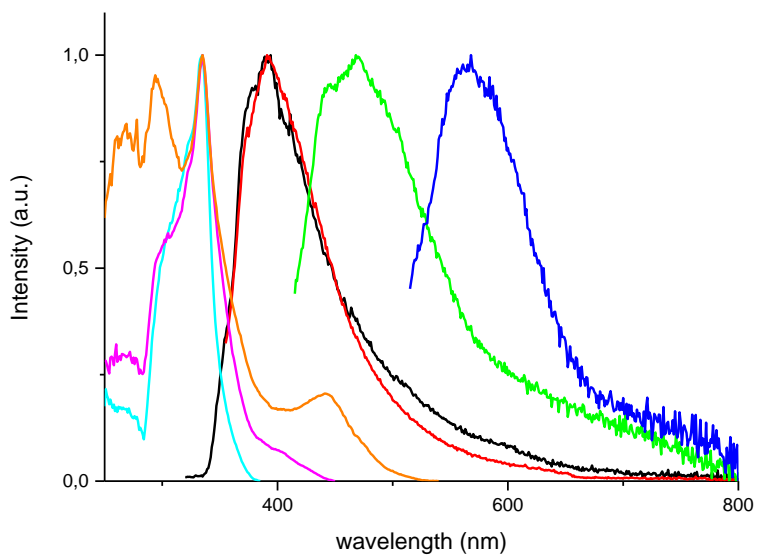

**Figure S16.** Normalized Emission spectra:  $\lambda_{\text{exc}}=300\text{nm}$  (black line),  $\lambda_{\text{exc}}=334\text{nm}$  (red line),  $\lambda_{\text{exc}}=400\text{nm}$  (green line),  $\lambda_{\text{exc}}=500\text{nm}$  (blue line) and excitation spectra  $\lambda_{\text{em}}=400\text{nm}$  (cyan line),  $\lambda_{\text{em}}=469\text{nm}$  (pink line),  $\lambda_{\text{em}}=563\text{nm}$  (orange line) of **3-Ag** at 77 K.

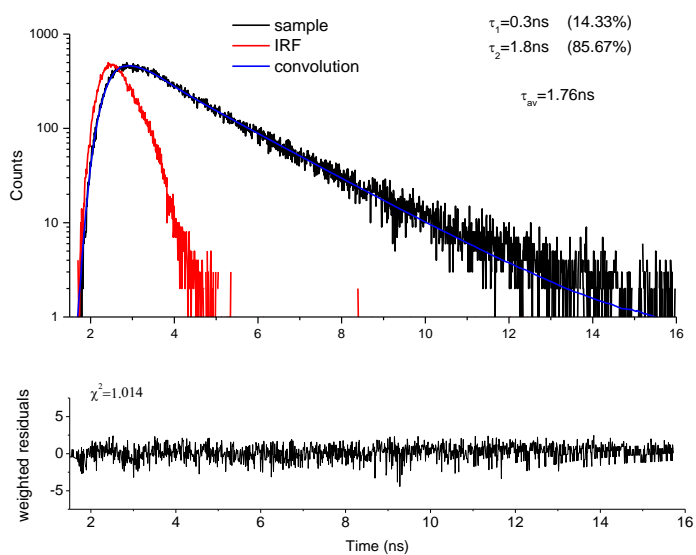

**Figure S17.** Lifetime measurement ( $\lambda_{\text{exc}}=300\text{nm}$ ,  $\lambda_{\text{em}}=392\text{nm}$ ) of **3-Ag** at 77 K.  $\tau_{\text{av}} = 1.76\text{ ns}$ .

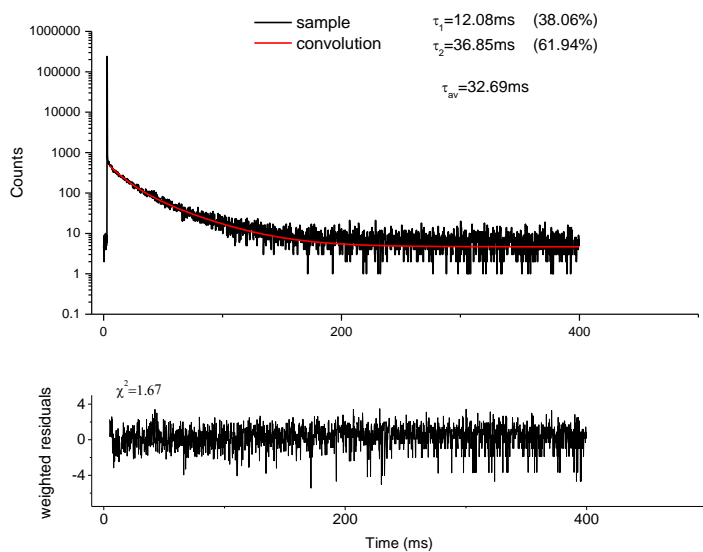

**Figure S18.** Lifetime measurement ( $\lambda_{exc}=334\text{nm}$ ,  $\lambda_{em}=448\text{nm}$ ) of **3-Ag** at 77 K.  $\tau_{av} = 32.69$  ms.

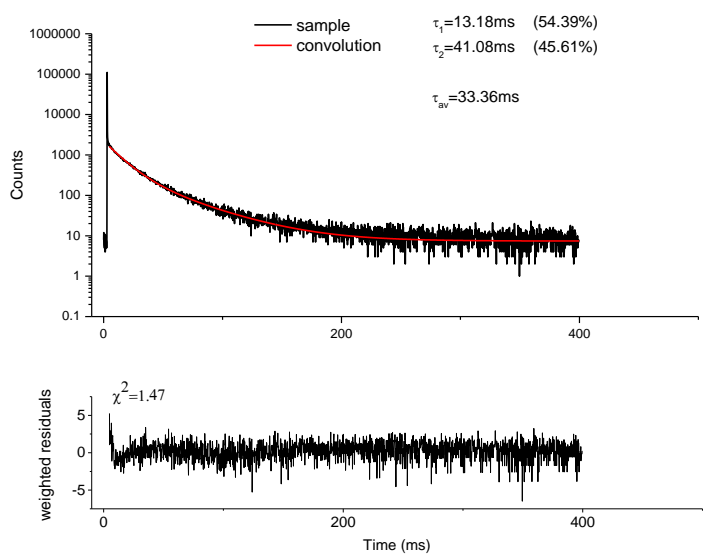

**Figure S19.** Lifetime measurement ( $\lambda_{exc}=334\text{nm}$ ,  $\lambda_{em}=563\text{nm}$ ) of **3-Ag** at 77 K.  $\tau_{av} = 33.36$  ms.



## 4. Theoretical studies

### 4.1. 1-Ag, 1-Cu

To simulate the 1D  $[M(\text{TT})\text{I}]_n$  ( $M = \text{Ag}, \text{Cu}$ ) stair-step polymeric structures **1-Ag** and **1-Cu**, the  $[M(\text{TT})\text{I}]_4$  discrete model (see Fig. S20), including two **TT** ligands on either sides of the stair, has been chosen in order to properly describe the  $\pi$ - $\pi$  interactions between the aromatic moieties, in addition to the metal-ligand and the metal-iodine bonds. Geometry optimization has been performed by freezing angles and torsions to preserve the correct coordination geometry around the metal ions. The optimized distances are generally rather close to the experimental values, though the symmetry of the infinite polymeric chain is lost owing to major boundary effects. In particular, the interplanar distances between adjacent **TT** ligands are equal to 3.213, 3.169 Å ( $M = \text{Ag}$ ) and 3.228, 3.083 Å ( $M = \text{Cu}$ ), to be compared with the X-ray values of 3.1726(19) (**1-Ag**) and 3.1730(6) Å (**1-Cu**), respectively. The distances between triazinic centroids are equal to 4.735, 4.693 Å ( $\text{Ag}$ ) and 4.537, 4.451 Å ( $\text{Cu}$ ), close to the experimental values of 4.731(2) (**1-Ag**) and 4.5090(13) Å (**1-Cu**), respectively. The M-I bond lengths within a step are slightly shorter for the steps external to the chain with respect to the internal ones, varying from 2.75 to 2.91 Å ( $\text{Ag}$ ) and from 2.56 to 2.65 Å ( $\text{Cu}$ ), to be compared with the X-ray distances of 2.8084(5) (**1-Ag**) and 2.611 Å (**1-Cu**), and the M...M separations are 3.19, 3.24 Å ( $\text{Ag}$ ) and 3.16, 3.24 Å ( $\text{Cu}$ ), in good agreement with the X-ray values (3.1591(5) for **1-Ag** and 3.248 Å for **1-Cu**). Finally, the M-N bond lengths, 2.35-2.38 Å ( $\text{Ag}$ ) and 2.05-2.10 Å ( $\text{Cu}$ ), are only slightly longer than the experimental values, 2.319(3) (**1-Ag**) and 2.028 Å (**1-Cu**).

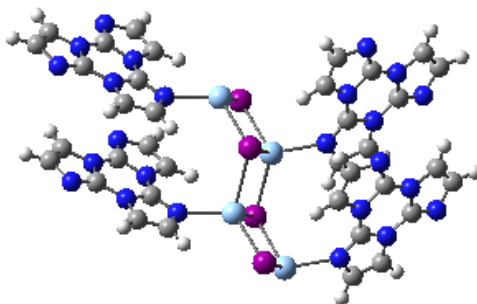

**Figure S20.** Tetrameric model compound of **1-Ag**,  $[\text{Ag}(\text{TT})\text{I}]_4$ .

The nature of bonding and non-bonding interactions involved in  $[\text{Ag}(\text{TT})\text{I}]_4$  and  $[\text{Cu}(\text{TT})\text{I}]_4$  has been explored by means of the QTAIM approach. The topological properties computed at selected bond critical points and ring critical points are reported in Table S2, while in Figure S21 are reported the molecular graphs. Looking at the bcp properties of the M-N bonds, it emerges a larger shared-shell character for the Cu compound with respect to the Ag compound. This is evidenced especially by the  $H_{\text{bcp}}/\rho_{\text{bcp}}$  and  $|V_{\text{bcp}}|/G_{\text{bcp}}$  ratios and by the electron Delocalization Index (i.e., average number of electrons shared between M and N), which are larger for the former than for the latter compound.

**Table S5.** Selected bond distances and bcp and rcp properties (electron density,  $\rho_{\text{bcp}}$ , Laplacian of electron density,  $\nabla^2\rho_{\text{bcp}}$ , potential, kinetic and total energy density,  $V_{\text{bcp}}$ ,  $G_{\text{bcp}}$  and  $H_{\text{bcp}}$ , respectively, and delocalization index, DI) for  $[\text{Ag}(\text{TT})\text{I}]_4$  and  $[\text{Cu}(\text{TT})\text{I}]_4$  model compounds.

|                        | $r$ (Å)    | $\rho_{\text{bcp}}$ ( $e/\text{Å}^3$ ) | $\nabla^2\rho_{\text{bcp}}$ ( $e/\text{Å}^3$ ) | $H_{\text{bcp}}/\rho_{\text{bcp}}$ | $ V_{\text{bcp}} /G_{\text{bcp}}$ | DI(A,B)     |
|------------------------|------------|----------------------------------------|------------------------------------------------|------------------------------------|-----------------------------------|-------------|
| Ag-N <sup>a</sup>      | 2.35-2.38  | 0.327-0.352                            | 4.75-5.18                                      | -0.084 – -0.091                    | 1.076-1.082                       | 0.353-0.391 |
| Cu-N <sup>a</sup>      | 2.05-2.10  | 0.448-0.506                            | 7.11-8.36                                      | -0.169 – -0.174                    | 1.131-1.132                       | 0.426-0.470 |
| <Ag-N> <sup>a,b</sup>  | 2.374      | 0.334                                  | 4.87                                           | -0.086                             | 1.08                              | 0.368       |
| <Cu-N> <sup>a,b</sup>  | 2.072      | 0.480                                  | 7.75                                           | -0.171                             | 1.13                              | 0.452       |
| Ag...Ag                | 3.19, 3.24 | no bcp                                 |                                                |                                    |                                   |             |
| Cu...Cu                | 3.16, 3.24 | no bcp                                 |                                                |                                    |                                   |             |
| Ag-I-Ag-I <sup>c</sup> |            | 0.104-0.113                            |                                                |                                    |                                   |             |
| Cu-I-Cu-I <sup>c</sup> |            | 0.091-0.109                            |                                                |                                    |                                   |             |

<sup>a</sup>Bond critical point; <sup>b</sup>Averages on the bcp properties of the four M-N bonds of the tetrameric models; <sup>c</sup>Ring critical point.

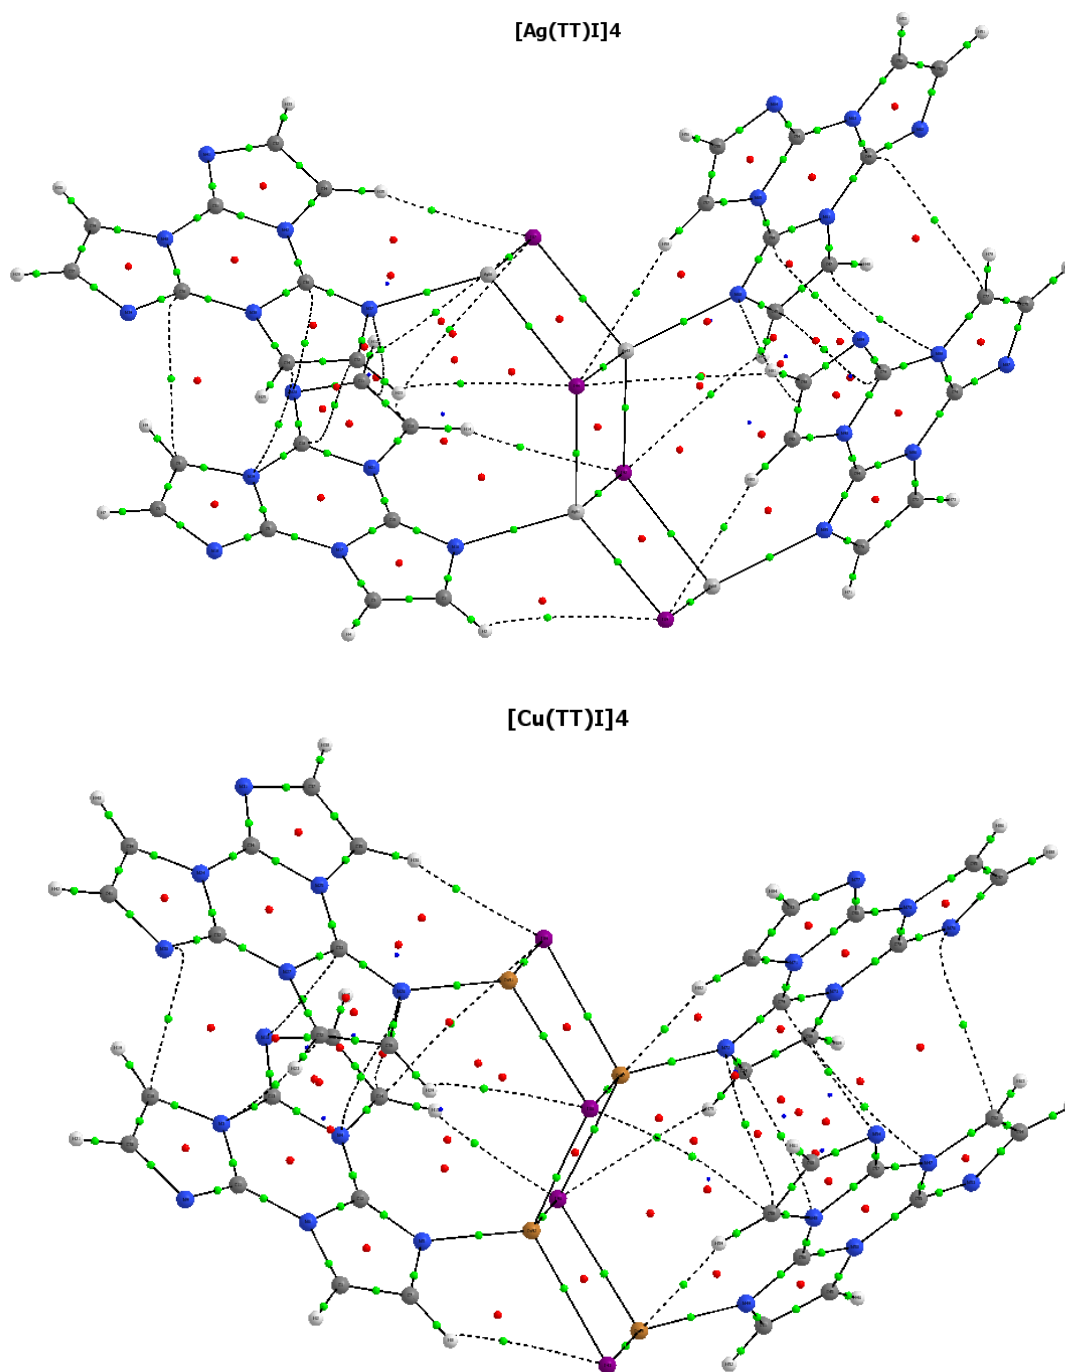

**Figure S21.** Molecular graphs of [Ag(TT)I]<sub>4</sub> (top) and [Cu(TT)I]<sub>4</sub> (bottom) with bond paths, bond critical points (green circles) and ring critical points (red circles).

The results of DFT/TDDFT calculations on model compounds [Ag(TT)I]<sub>4</sub> and [Cu(TT)I]<sub>4</sub> are reported in Figures S22 (simulated absorption spectra), S23 (scheme of excited states), S24, S25 (Plots of the MOs mainly involved in the lowest energy transitions) and Tables S6, S7 (Gaussian16 output of the S<sub>0</sub>→S<sub>n</sub> and T<sub>0</sub>→T<sub>n</sub> transitions).

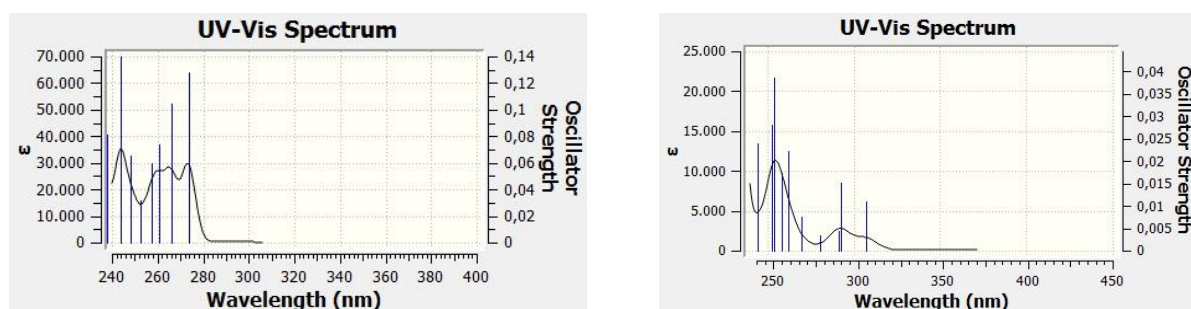

**Figure S22.** Simulated absorption spectra of model compounds  $[\text{Ag}(\text{TT})\text{I}]_4$  (at  $\omega\text{B97X}/\text{def2-TZVP}$  level, left) and  $[\text{Cu}(\text{TT})\text{I}]_4$  (at  $\omega\text{B97X}/6-311++\text{G}(\text{d},\text{p})$  level, right), resulting from convolution of the excitation energies with 0.06 eV ( $[\text{Ag}(\text{TT})\text{I}]_4$ ) and 0.1 eV ( $[\text{Cu}(\text{TT})\text{I}]_4$ ) of half-bandwidth.

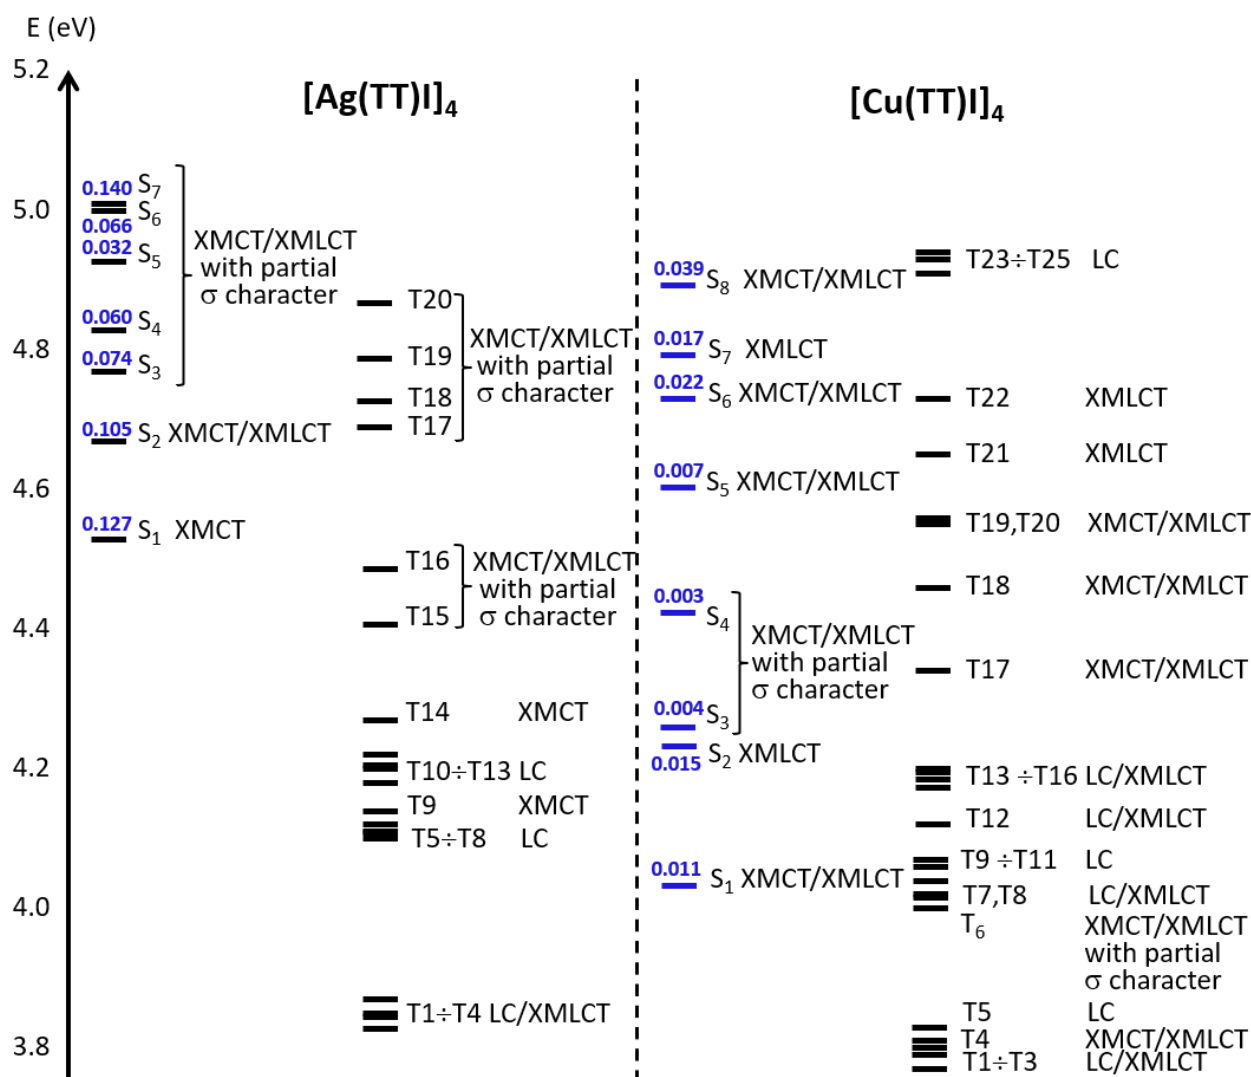

**Figure S23.** Scheme of singlet and triplet electronic levels with oscillator strengths for singlet states (in blue) and character for model compounds  $[\text{Ag}(\text{TT})\text{I}]_4$  (at  $\omega\text{B97X}/\text{def2-TZVP}$  level, left) and  $[\text{Cu}(\text{TT})\text{I}]_4$  (at  $\omega\text{B97X}/6-311++\text{G}(\text{d},\text{p})$  level, right).

[Ag(TT)I]<sub>4</sub>: HOMOs

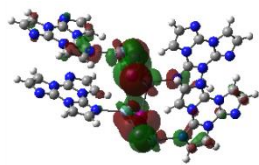

MO = 272 (HOMO-20)

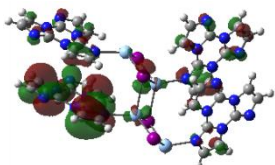

273 (HOMO-19)

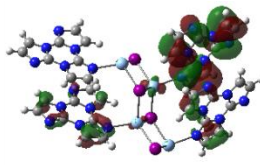

274 (HOMO-18)

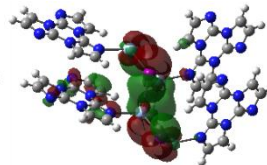

275 (HOMO-17)

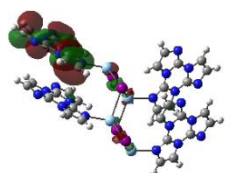

276 (HOMO-16)

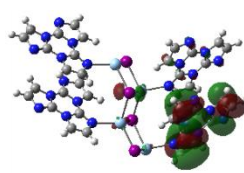

277 (HOMO-15)

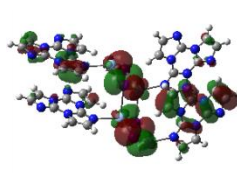

278 (HOMO-14)

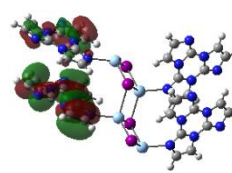

279 (HOMO-13)

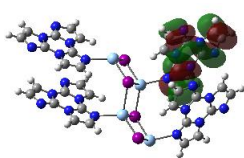

280 (HOMO-12)

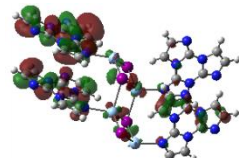

281 (HOMO-11)

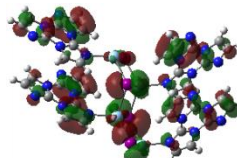

282 (HOMO-10)

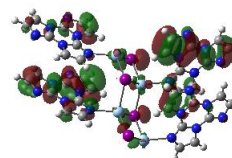

283 (HOMO-9)

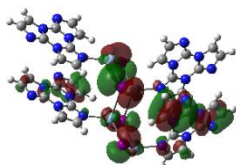

284 (HOMO-8)

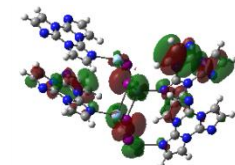

285 (HOMO-7)

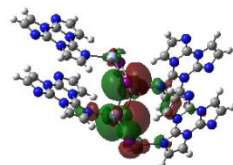

286 (HOMO-6)

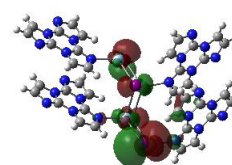

287 (HOMO-5)

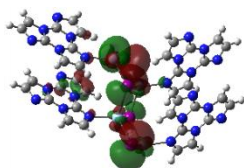

288 (HOMO-4)

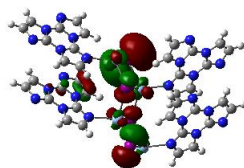

289 (HOMO-3)

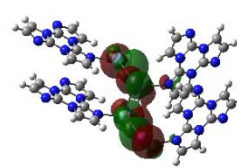

290 (HOMO-2)

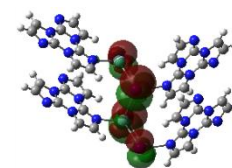

291 (HOMO-1)

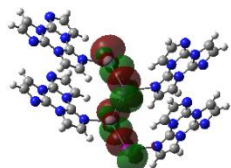

292 (HOMO)

**[Ag(TT)I]<sub>4</sub>: LUMOs**

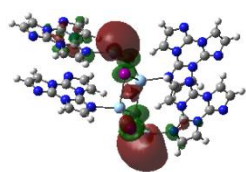

MO = 293 (LUMO)

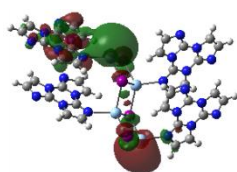

294 (LUMO+1)

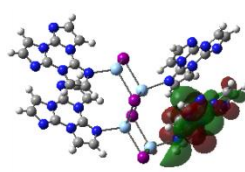

295 (LUMO+2)

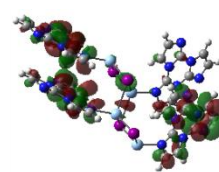

296 (LUMO+3)

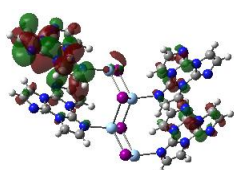

297 (LUMO+4)

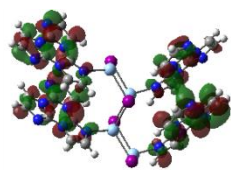

298 (LUMO+5)

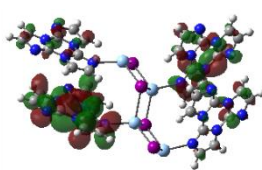

299 (LUMO+6)

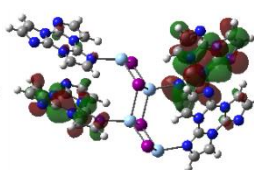

300 (LUMO+7)

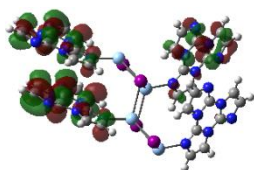

301 (LUMO+8)

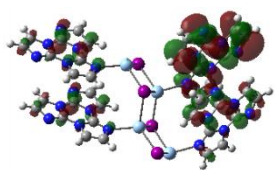

302 (LUMO+9)

**Figure S24.** Plots of the  $\omega$ B97X/def2-TZVP MOs mainly involved in the lowest energy transitions of [Ag(TT)I]<sub>4</sub> (Isosurfaces value 0.02).

**[Cu(TT)I]<sub>4</sub>: HOMOs**

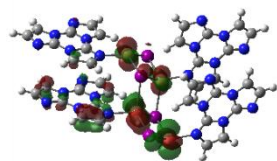

MO = 340 (HOMO-28)

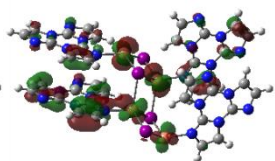

341 (HOMO-27)

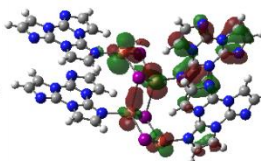

342 (HOMO-26)

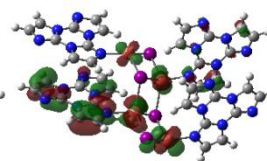

343 (HOMO-25)

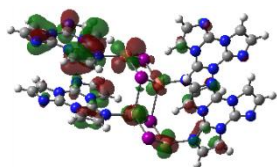

344 (HOMO-24)

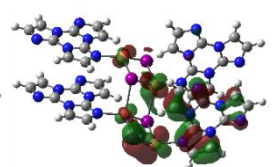

345 (HOMO-23)

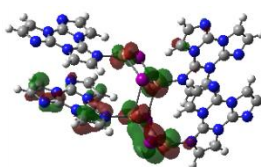

346 (HOMO-22)

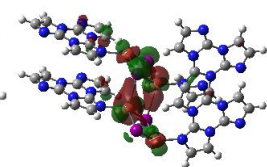

347 (HOMO-21)



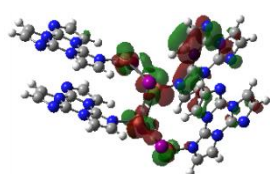

348 (HOMO-20)

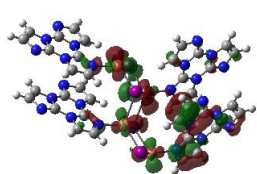

349 (HOMO-19)

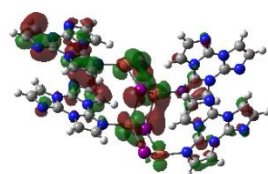

350 (HOMO-18)

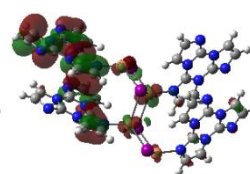

351 (HOMO-17)

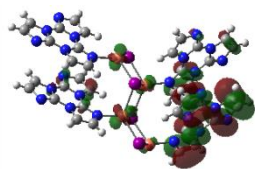

352 (HOMO-16)

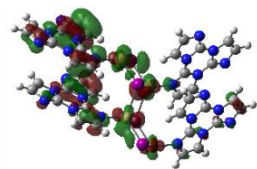

353 (HOMO-15)

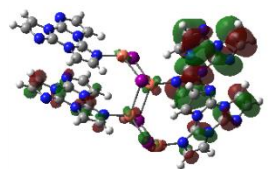

354 (HOMO-14)

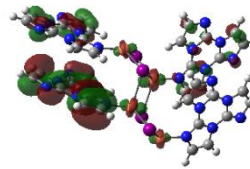

355 (HOMO-13)

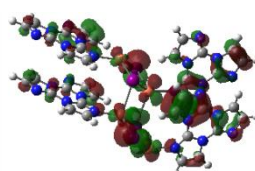

356 (HOMO-12)

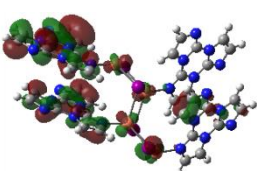

357 (HOMO-11)

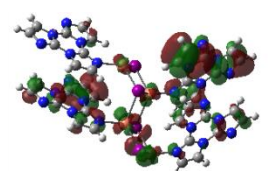

358 (HOMO-10)

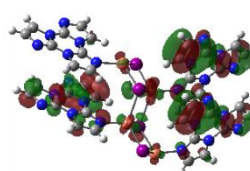

359 (HOMO-9)

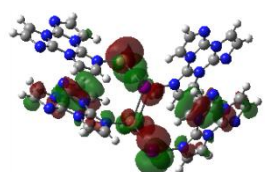

360 (HOMO-8)

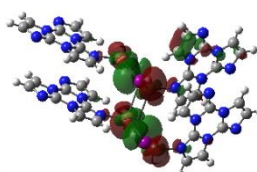

361 (HOMO-7)

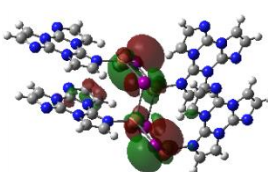

362 (HOMO-6)

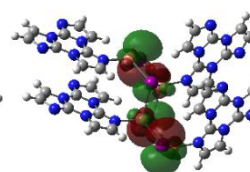

363 (HOMO-5)

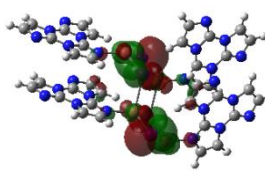

364 (HOMO-4)

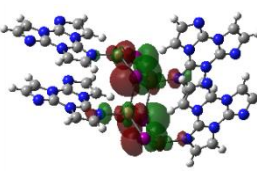

365 (HOMO-3)

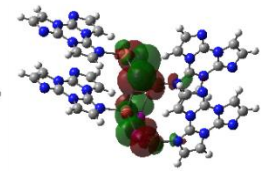

366 (HOMO-2)

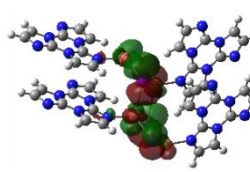

367 (HOMO-1)

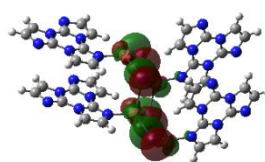

368 (HOMO)

[Cu(TT)I]<sub>4</sub>: LUMOs

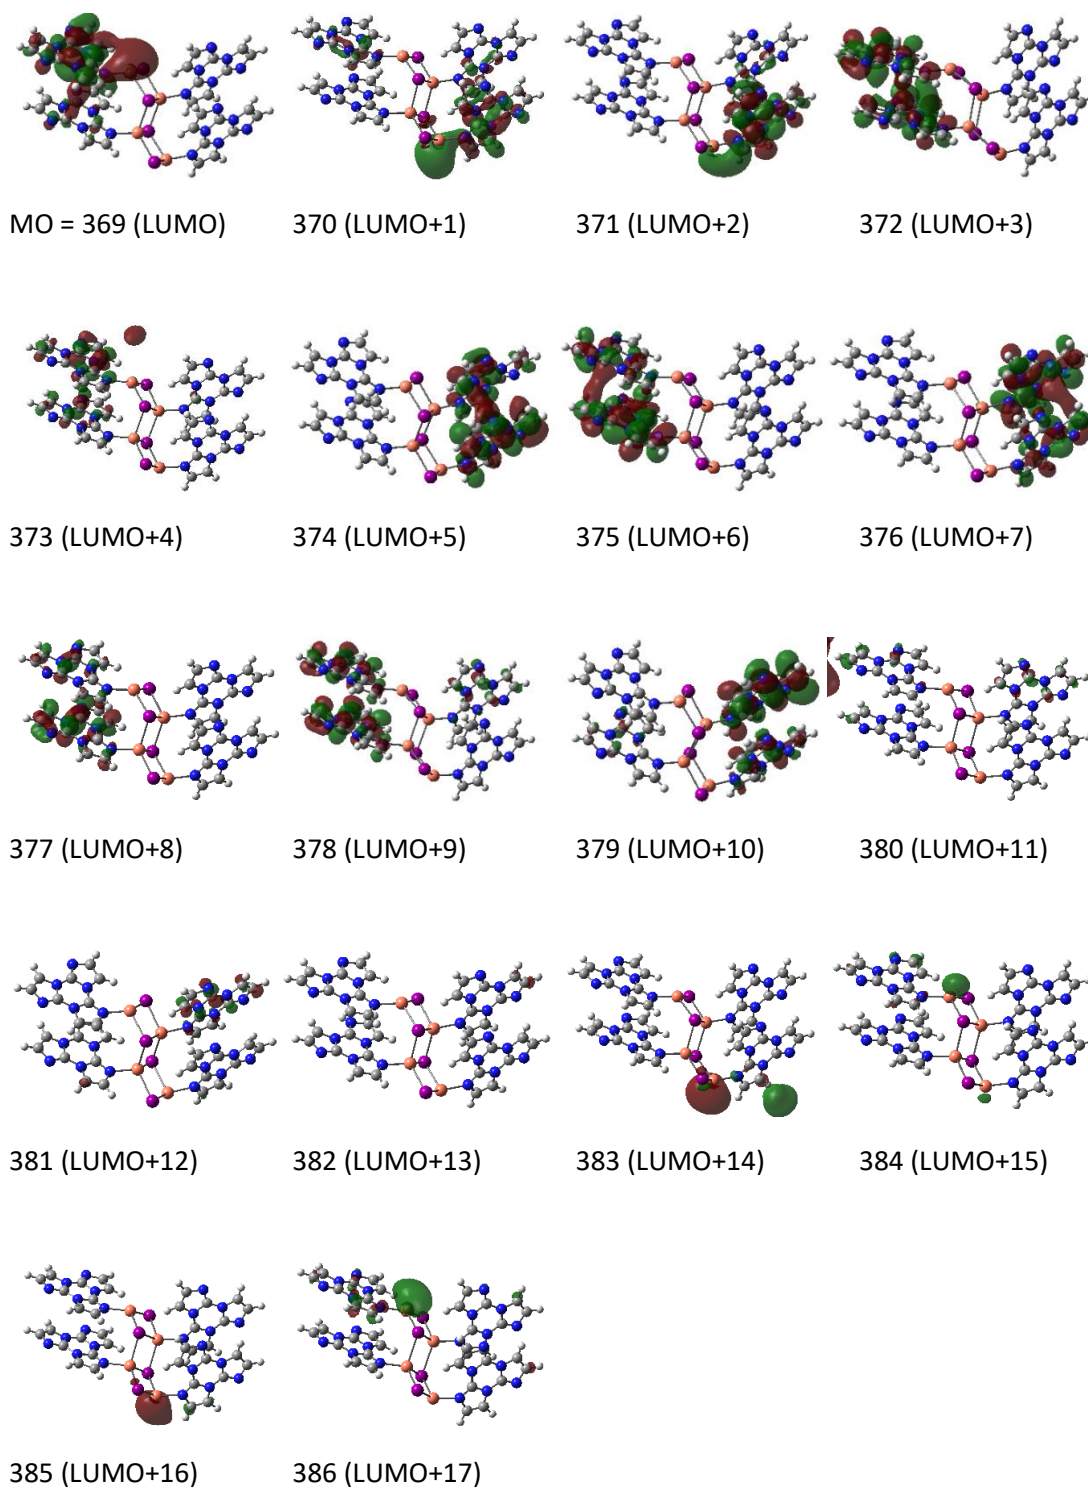

**Figure S25.** Plots of the  $\omega$ B97X/6-311++G(d,p) MOs mainly involved in the lowest energy transitions of [Cu(TT)I]<sub>4</sub> (Isosurfaces value 0.02).

**Table S6.** First TD- $\omega$ B97X/def2-TZVP  $S_0 \rightarrow S_n$  and  $T_0 \rightarrow T_n$  transitions computed for the optimized geometry of [Ag(TT)]<sub>4</sub>.Singlets:

|               |        |           |           |           |          |              |
|---------------|--------|-----------|-----------|-----------|----------|--------------|
| Excited State | 1:     | Singlet-A | 4.5326 eV | 273.54 nm | f=0.1274 | <S**2>=0.000 |
|               | 290 -> | 293       | -0.29536  |           |          |              |
|               | 290 -> | 294       | -0.25764  |           |          |              |
|               | 292 -> | 293       | 0.40815   |           |          |              |
|               | 292 -> | 294       | 0.23580   |           |          |              |
| Excited State | 2:     | Singlet-A | 4.6615 eV | 265.97 nm | f=0.1046 | <S**2>=0.000 |
|               | 290 -> | 293       | -0.28652  |           |          |              |
|               | 290 -> | 294       | 0.16850   |           |          |              |
|               | 291 -> | 293       | -0.10771  |           |          |              |
|               | 292 -> | 293       | -0.27900  |           |          |              |
|               | 292 -> | 294       | 0.35119   |           |          |              |
|               | 292 -> | 296       | -0.13051  |           |          |              |
|               | 292 -> | 297       | -0.11634  |           |          |              |
| Excited State | 3:     | Singlet-A | 4.7565 eV | 260.66 nm | f=0.0739 | <S**2>=0.000 |
|               | 286 -> | 293       | 0.12916   |           |          |              |
|               | 286 -> | 294       | 0.11063   |           |          |              |
|               | 287 -> | 293       | 0.38717   |           |          |              |
|               | 287 -> | 294       | 0.28041   |           |          |              |
|               | 290 -> | 294       | -0.10694  |           |          |              |
|               | 291 -> | 293       | -0.27546  |           |          |              |
|               | 291 -> | 294       | -0.15628  |           |          |              |
|               | 292 -> | 293       | 0.12200   |           |          |              |
| Excited State | 4:     | Singlet-A | 4.8212 eV | 257.17 nm | f=0.0599 | <S**2>=0.000 |
|               | 287 -> | 293       | -0.10406  |           |          |              |
|               | 288 -> | 293       | 0.25566   |           |          |              |
|               | 288 -> | 294       | -0.23671  |           |          |              |
|               | 289 -> | 293       | 0.21377   |           |          |              |
|               | 289 -> | 294       | -0.21300  |           |          |              |
|               | 291 -> | 293       | -0.22367  |           |          |              |
|               | 291 -> | 294       | 0.18753   |           |          |              |
| Excited State | 5:     | Singlet-A | 4.9067 eV | 252.68 nm | f=0.0321 | <S**2>=0.000 |
|               | 284 -> | 293       | 0.14346   |           |          |              |
|               | 284 -> | 294       | 0.10553   |           |          |              |
|               | 286 -> | 293       | -0.16108  |           |          |              |
|               | 286 -> | 294       | -0.15820  |           |          |              |
|               | 287 -> | 293       | 0.14649   |           |          |              |
|               | 287 -> | 294       | 0.15265   |           |          |              |
|               | 288 -> | 293       | 0.35589   |           |          |              |
|               | 288 -> | 294       | 0.18314   |           |          |              |
|               | 289 -> | 293       | -0.23219  |           |          |              |
|               | 291 -> | 293       | 0.15423   |           |          |              |
|               | 291 -> | 294       | 0.10394   |           |          |              |
| Excited State | 6:     | Singlet-A | 4.9937 eV | 248.28 nm | f=0.0658 | <S**2>=0.000 |
|               | 287 -> | 293       | 0.20070   |           |          |              |
|               | 289 -> | 293       | 0.30757   |           |          |              |
|               | 289 -> | 294       | -0.27348  |           |          |              |
|               | 289 -> | 296       | 0.11509   |           |          |              |
|               | 289 -> | 297       | 0.12376   |           |          |              |
|               | 289 -> | 304       | 0.10846   |           |          |              |
|               | 290 -> | 294       | 0.10596   |           |          |              |
|               | 291 -> | 293       | 0.21666   |           |          |              |
| Excited State | 7:     | Singlet-A | 5.0891 eV | 243.63 nm | f=0.1397 | <S**2>=0.000 |
|               | 286 -> | 293       | 0.39834   |           |          |              |
|               | 286 -> | 296       | 0.11132   |           |          |              |
|               | 286 -> | 303       | 0.18811   |           |          |              |
|               | 288 -> | 294       | -0.10482  |           |          |              |
|               | 290 -> | 294       | 0.11232   |           |          |              |
|               | 291 -> | 293       | 0.19636   |           |          |              |
|               | 291 -> | 303       | 0.13012   |           |          |              |
|               | 292 -> | 303       | 0.22670   |           |          |              |
| Excited State | 8:     | Singlet-A | 5.2131 eV | 237.83 nm | f=0.0815 | <S**2>=0.000 |
|               | 278 -> | 293       | 0.17708   |           |          |              |
|               | 284 -> | 293       | 0.10922   |           |          |              |
|               | 288 -> | 294       | 0.14408   |           |          |              |
|               | 290 -> | 304       | 0.11486   |           |          |              |
|               | 291 -> | 293       | -0.25200  |           |          |              |
|               | 291 -> | 296       | -0.14357  |           |          |              |



291 -> 303 -0.25204  
 292 -> 293 0.13187  
 292 -> 296 0.14070  
 292 -> 303 0.30077

Excited State 9: Singlet-A 5.3205 eV 233.03 nm f=0.0049 <S\*\*2>=0.000  
 272 -> 294 0.10219  
 275 -> 293 -0.11939  
 278 -> 294 0.10630  
 282 -> 293 0.24307  
 283 -> 293 0.10639  
 284 -> 293 -0.13953  
 285 -> 293 0.23596  
 286 -> 294 0.19845  
 291 -> 294 0.16969  
 292 -> 303 -0.12984

Excited State 10: Singlet-A 5.3262 eV 232.78 nm f=0.0139 <S\*\*2>=0.000  
 277 -> 295 0.38704  
 278 -> 296 -0.12437  
 278 -> 298 -0.13417  
 281 -> 298 -0.10147  
 282 -> 298 0.10850  
 284 -> 295 0.14521  
 284 -> 296 0.17544  
 284 -> 298 0.18657

Triplets:

Excited State 1: Triplet-A 3.8293 eV 323.78 nm f=0.0000 <S\*\*2>=2.000  
 277 -> 295 0.26814  
 278 -> 296 -0.12064  
 278 -> 298 -0.13934  
 282 -> 298 0.10061  
 283 -> 295 -0.10919  
 284 -> 295 0.23524  
 284 -> 296 0.13498  
 284 -> 298 0.17610  
 284 -> 302 -0.10479

Excited State 2: Triplet-A 3.8478 eV 322.22 nm f=0.0000 <S\*\*2>=2.000  
 276 -> 297 0.21015  
 279 -> 296 0.11215  
 279 -> 301 -0.13618  
 281 -> 294 0.16837  
 281 -> 296 0.17159  
 281 -> 298 -0.19495  
 281 -> 299 -0.11523  
 281 -> 301 -0.13222  
 282 -> 301 -0.12540  
 283 -> 301 0.15228

Excited State 3: Triplet-A 3.8539 eV 321.71 nm f=0.0000 <S\*\*2>=2.000  
 279 -> 299 -0.24022  
 279 -> 300 -0.14002  
 281 -> 301 -0.21599  
 282 -> 296 0.11167  
 282 -> 298 -0.10531  
 283 -> 296 -0.17086  
 283 -> 298 0.18268  
 283 -> 301 -0.15012  
 285 -> 296 -0.10633  
 285 -> 298 0.11301  
 285 -> 301 -0.11285

Excited State 4: Triplet-A 3.8690 eV 320.46 nm f=0.0000 <S\*\*2>=2.000  
 280 -> 299 -0.12638  
 280 -> 300 0.25507  
 280 -> 302 0.10775  
 282 -> 302 0.14254  
 283 -> 298 0.12192  
 283 -> 302 0.21699  
 285 -> 297 0.10779  
 285 -> 298 -0.14708  
 285 -> 301 -0.11592  
 285 -> 302 -0.25795

Excited State 5: Triplet-A 4.1040 eV 302.10 nm f=0.0000 <S\*\*2>=2.000

|               |          |           |           |           |          |              |
|---------------|----------|-----------|-----------|-----------|----------|--------------|
| 277 -> 295    | 0.21563  |           |           |           |          |              |
| 277 -> 296    | -0.23047 |           |           |           |          |              |
| 277 -> 297    | 0.10428  |           |           |           |          |              |
| 277 -> 298    | -0.22324 |           |           |           |          |              |
| 277 -> 299    | 0.10354  |           |           |           |          |              |
| 277 -> 302    | 0.11403  |           |           |           |          |              |
| 278 -> 295    | 0.15994  |           |           |           |          |              |
| 284 -> 295    | -0.12468 |           |           |           |          |              |
|               |          |           |           |           |          |              |
| Excited State | 6:       | Triplet-A | 4.1138 eV | 301.39 nm | f=0.0000 | <S**2>=2.000 |
| 273 -> 296    |          | -0.10878  |           |           |          |              |
| 273 -> 298    |          | 0.12518   |           |           |          |              |
| 273 -> 301    |          | -0.12833  |           |           |          |              |
| 276 -> 297    |          | -0.19919  |           |           |          |              |
| 279 -> 299    |          | -0.25405  |           |           |          |              |
| 279 -> 300    |          | -0.15779  |           |           |          |              |
| 279 -> 301    |          | 0.15080   |           |           |          |              |
| 281 -> 299    |          | 0.10882   |           |           |          |              |
| 282 -> 301    |          | -0.10767  |           |           |          |              |
|               |          |           |           |           |          |              |
| Excited State | 7:       | Triplet-A | 4.1221 eV | 300.78 nm | f=0.0000 | <S**2>=2.000 |
| 273 -> 301    |          | -0.10702  |           |           |          |              |
| 276 -> 294    |          | 0.11506   |           |           |          |              |
| 276 -> 296    |          | 0.11676   |           |           |          |              |
| 276 -> 297    |          | 0.33173   |           |           |          |              |
| 278 -> 297    |          | -0.11373  |           |           |          |              |
| 279 -> 299    |          | -0.13331  |           |           |          |              |
| 279 -> 301    |          | 0.15332   |           |           |          |              |
| 281 -> 306    |          | 0.11007   |           |           |          |              |
|               |          |           |           |           |          |              |
| Excited State | 8:       | Triplet-A | 4.1280 eV | 300.35 nm | f=0.0000 | <S**2>=2.000 |
| 274 -> 302    |          | -0.18511  |           |           |          |              |
| 280 -> 299    |          | 0.16561   |           |           |          |              |
| 280 -> 300    |          | -0.35634  |           |           |          |              |
| 280 -> 301    |          | -0.11305  |           |           |          |              |
| 280 -> 302    |          | -0.19164  |           |           |          |              |
| 285 -> 302    |          | -0.11740  |           |           |          |              |
|               |          |           |           |           |          |              |
| Excited State | 9:       | Triplet-A | 4.1410 eV | 299.41 nm | f=0.0000 | <S**2>=2.000 |
| 290 -> 293    |          | -0.27763  |           |           |          |              |
| 290 -> 294    |          | -0.26320  |           |           |          |              |
| 291 -> 293    |          | -0.11189  |           |           |          |              |
| 292 -> 293    |          | 0.40902   |           |           |          |              |
| 292 -> 294    |          | 0.18371   |           |           |          |              |
|               |          |           |           |           |          |              |
| Excited State | 10:      | Triplet-A | 4.1836 eV | 296.35 nm | f=0.0000 | <S**2>=2.000 |
| 273 -> 299    |          | -0.25366  |           |           |          |              |
| 273 -> 300    |          | -0.14548  |           |           |          |              |
| 273 -> 301    |          | 0.10250   |           |           |          |              |
| 279 -> 296    |          | -0.15396  |           |           |          |              |
| 279 -> 298    |          | 0.15349   |           |           |          |              |
| 279 -> 299    |          | -0.14492  |           |           |          |              |
| 279 -> 301    |          | -0.12224  |           |           |          |              |
| 279 -> 307    |          | -0.14296  |           |           |          |              |
| 281 -> 301    |          | 0.10882   |           |           |          |              |
| 283 -> 299    |          | -0.13888  |           |           |          |              |
| 283 -> 301    |          | 0.10356   |           |           |          |              |
|               |          |           |           |           |          |              |
| Excited State | 11:      | Triplet-A | 4.2013 eV | 295.11 nm | f=0.0000 | <S**2>=2.000 |
| 270 -> 295    |          | -0.19114  |           |           |          |              |
| 271 -> 295    |          | 0.23331   |           |           |          |              |
| 277 -> 295    |          | -0.29561  |           |           |          |              |
| 277 -> 305    |          | -0.15982  |           |           |          |              |
| 277 -> 307    |          | -0.10653  |           |           |          |              |
| 284 -> 295    |          | -0.10634  |           |           |          |              |
|               |          |           |           |           |          |              |
| Excited State | 12:      | Triplet-A | 4.2131 eV | 294.28 nm | f=0.0000 | <S**2>=2.000 |
| 274 -> 299    |          | 0.13795   |           |           |          |              |
| 274 -> 300    |          | -0.27474  |           |           |          |              |
| 280 -> 298    |          | -0.13223  |           |           |          |              |
| 280 -> 302    |          | -0.21757  |           |           |          |              |
| 280 -> 308    |          | 0.19171   |           |           |          |              |
| 282 -> 300    |          | -0.11279  |           |           |          |              |
| 283 -> 300    |          | -0.12394  |           |           |          |              |
| 285 -> 300    |          | 0.15857   |           |           |          |              |
|               |          |           |           |           |          |              |
| Excited State | 13:      | Triplet-A | 4.2236 eV | 293.55 nm | f=0.0000 | <S**2>=2.000 |
| 269 -> 297    |          | -0.15263  |           |           |          |              |

|                   |           |           |           |          |              |
|-------------------|-----------|-----------|-----------|----------|--------------|
| 270 -> 297        | 0.18057   |           |           |          |              |
| 271 -> 297        | 0.15481   |           |           |          |              |
| 276 -> 294        | 0.12600   |           |           |          |              |
| 276 -> 296        | 0.12704   |           |           |          |              |
| 276 -> 298        | -0.13318  |           |           |          |              |
| 276 -> 301        | -0.13594  |           |           |          |              |
| 276 -> 306        | 0.19926   |           |           |          |              |
| 281 -> 297        | 0.20937   |           |           |          |              |
| 282 -> 297        | 0.10582   |           |           |          |              |
|                   |           |           |           |          |              |
| Excited State 14: | Triplet-A | 4.2700 eV | 290.36 nm | f=0.0000 | <S**2>=2.000 |
| 288 -> 293        | -0.13671  |           |           |          |              |
| 290 -> 293        | -0.29376  |           |           |          |              |
| 290 -> 294        | 0.12553   |           |           |          |              |
| 292 -> 293        | -0.23149  |           |           |          |              |
| 292 -> 294        | 0.31132   |           |           |          |              |
| 292 -> 296        | -0.13996  |           |           |          |              |
| 292 -> 297        | -0.11090  |           |           |          |              |
|                   |           |           |           |          |              |
| Excited State 15: | Triplet-A | 4.3959 eV | 282.04 nm | f=0.0000 | <S**2>=2.000 |
| 286 -> 293        | 0.17014   |           |           |          |              |
| 286 -> 294        | 0.12154   |           |           |          |              |
| 287 -> 293        | 0.31046   |           |           |          |              |
| 287 -> 294        | 0.25557   |           |           |          |              |
| 291 -> 293        | -0.30601  |           |           |          |              |
| 291 -> 294        | -0.14088  |           |           |          |              |
| 292 -> 293        | -0.11375  |           |           |          |              |
|                   |           |           |           |          |              |
| Excited State 16: | Triplet-A | 4.4838 eV | 276.52 nm | f=0.0000 | <S**2>=2.000 |
| 287 -> 293        | 0.16146   |           |           |          |              |
| 288 -> 293        | -0.22403  |           |           |          |              |
| 288 -> 294        | 0.21408   |           |           |          |              |
| 289 -> 293        | -0.13469  |           |           |          |              |
| 289 -> 294        | 0.11811   |           |           |          |              |
| 290 -> 293        | 0.10020   |           |           |          |              |
| 291 -> 293        | 0.20217   |           |           |          |              |
| 291 -> 294        | -0.20124  |           |           |          |              |
| 291 -> 296        | 0.10371   |           |           |          |              |
| 292 -> 294        | -0.10462  |           |           |          |              |
|                   |           |           |           |          |              |
| Excited State 17: | Triplet-A | 4.6848 eV | 264.65 nm | f=0.0000 | <S**2>=2.000 |
| 284 -> 293        | 0.11020   |           |           |          |              |
| 287 -> 293        | 0.24067   |           |           |          |              |
| 287 -> 294        | 0.20076   |           |           |          |              |
| 288 -> 293        | 0.31635   |           |           |          |              |
| 288 -> 294        | 0.13258   |           |           |          |              |
| 289 -> 293        | -0.15282  |           |           |          |              |
| 289 -> 294        | -0.13907  |           |           |          |              |
| 291 -> 293        | 0.19492   |           |           |          |              |
| 291 -> 303        | 0.14244   |           |           |          |              |
|                   |           |           |           |          |              |
| Excited State 18: | Triplet-A | 4.7167 eV | 262.86 nm | f=0.0000 | <S**2>=2.000 |
| 278 -> 293        | -0.11135  |           |           |          |              |
| 284 -> 293        | -0.11334  |           |           |          |              |
| 286 -> 293        | 0.19873   |           |           |          |              |
| 288 -> 294        | -0.19216  |           |           |          |              |
| 289 -> 293        | 0.19008   |           |           |          |              |
| 291 -> 293        | 0.20919   |           |           |          |              |
| 291 -> 296        | 0.18425   |           |           |          |              |
| 291 -> 303        | 0.37087   |           |           |          |              |
|                   |           |           |           |          |              |
| Excited State 19: | Triplet-A | 4.7822 eV | 259.26 nm | f=0.0000 | <S**2>=2.000 |
| 286 -> 293        | -0.11794  |           |           |          |              |
| 287 -> 293        | 0.14634   |           |           |          |              |
| 287 -> 294        | -0.11012  |           |           |          |              |
| 289 -> 293        | 0.32443   |           |           |          |              |
| 289 -> 294        | -0.29433  |           |           |          |              |
| 289 -> 296        | 0.12483   |           |           |          |              |
| 289 -> 297        | 0.13435   |           |           |          |              |
| 289 -> 304        | 0.11597   |           |           |          |              |
| 291 -> 303        | -0.11860  |           |           |          |              |
|                   |           |           |           |          |              |
| Excited State 20: | Triplet-A | 4.8647 eV | 254.87 nm | f=0.0000 | <S**2>=2.000 |
| 278 -> 293        | 0.11187   |           |           |          |              |
| 286 -> 293        | 0.26547   |           |           |          |              |
| 286 -> 303        | 0.15105   |           |           |          |              |
| 290 -> 294        | 0.14962   |           |           |          |              |
| 290 -> 304        | 0.13382   |           |           |          |              |

|            |         |
|------------|---------|
| 292 -> 293 | 0.11395 |
| 292 -> 296 | 0.15828 |
| 292 -> 303 | 0.38636 |

**Table S7.** First TD- $\omega$ B97X/6-311++G(d,p)  $S_0 \rightarrow S_n$  and  $T_0 \rightarrow T_n$  transitions computed for the optimized geometry of [Cu(TT)I]<sub>4</sub>.

Singlets:

|               |    |            |           |           |          |              |
|---------------|----|------------|-----------|-----------|----------|--------------|
| Excited State | 1: | Singlet-A  | 4.0385 eV | 307.01 nm | f=0.0109 | <S**2>=0.000 |
|               |    | 366 -> 370 |           |           | 0.19515  |              |
|               |    | 366 -> 371 |           |           | 0.12027  |              |
|               |    | 366 -> 383 |           |           | -0.16744 |              |
|               |    | 366 -> 385 |           |           | -0.12479 |              |
|               |    | 368 -> 370 |           |           | 0.20325  |              |
|               |    | 368 -> 371 |           |           | 0.12385  |              |
|               |    | 368 -> 383 |           |           | -0.17253 |              |
|               |    | 368 -> 385 |           |           | -0.13018 |              |
| Excited State | 2: | Singlet-A  | 4.2393 eV | 292.46 nm | f=0.0152 | <S**2>=0.000 |
|               |    | 349 -> 369 |           |           | 0.12407  |              |
|               |    | 361 -> 369 |           |           | 0.12702  |              |
|               |    | 366 -> 369 |           |           | -0.17398 |              |
|               |    | 367 -> 369 |           |           | 0.20183  |              |
|               |    | 367 -> 386 |           |           | -0.10714 |              |
|               |    | 368 -> 369 |           |           | 0.23296  |              |
|               |    | 368 -> 386 |           |           | -0.12012 |              |
| Excited State | 3: | Singlet-A  | 4.2588 eV | 291.13 nm | f=0.0043 | <S**2>=0.000 |
|               |    | 364 -> 370 |           |           | -0.18461 |              |
|               |    | 364 -> 371 |           |           | -0.12601 |              |
|               |    | 364 -> 383 |           |           | 0.16278  |              |
|               |    | 364 -> 385 |           |           | 0.11918  |              |
|               |    | 365 -> 370 |           |           | -0.12602 |              |
|               |    | 365 -> 383 |           |           | 0.11030  |              |
| Excited State | 4: | Singlet-A  | 4.4184 eV | 280.61 nm | f=0.0034 | <S**2>=0.000 |
|               |    | 364 -> 369 |           |           | 0.24714  |              |
|               |    | 364 -> 386 |           |           | -0.13397 |              |
|               |    | 364 -> 390 |           |           | -0.10334 |              |
|               |    | 365 -> 369 |           |           | -0.19547 |              |
|               |    | 365 -> 386 |           |           | 0.10496  |              |
|               |    | 368 -> 369 |           |           | -0.12234 |              |
| Excited State | 5: | Singlet-A  | 4.5995 eV | 269.56 nm | f=0.0075 | <S**2>=0.000 |
|               |    | 345 -> 370 |           |           | 0.13117  |              |
|               |    | 345 -> 383 |           |           | -0.12171 |              |
|               |    | 362 -> 370 |           |           | 0.13266  |              |
|               |    | 362 -> 383 |           |           | -0.11490 |              |
|               |    | 363 -> 370 |           |           | 0.17083  |              |
|               |    | 363 -> 371 |           |           | 0.10877  |              |
|               |    | 363 -> 383 |           |           | -0.14467 |              |
|               |    | 363 -> 385 |           |           | -0.10424 |              |
| Excited State | 6: | Singlet-A  | 4.7308 eV | 262.08 nm | f=0.0223 | <S**2>=0.000 |
|               |    | 343 -> 370 |           |           | -0.13655 |              |
|               |    | 343 -> 383 |           |           | 0.12651  |              |
|               |    | 346 -> 370 |           |           | 0.11888  |              |
|               |    | 346 -> 383 |           |           | -0.10857 |              |
|               |    | 349 -> 370 |           |           | -0.11858 |              |
|               |    | 349 -> 383 |           |           | 0.10413  |              |
| Excited State | 7: | Singlet-A  | 4.7939 eV | 258.63 nm | f=0.0174 | <S**2>=0.000 |
|               |    | 335 -> 369 |           |           | 0.10133  |              |
|               |    | 336 -> 369 |           |           | -0.11191 |              |
|               |    | 342 -> 369 |           |           | -0.11001 |              |
|               |    | 344 -> 369 |           |           | 0.12343  |              |
|               |    | 362 -> 369 |           |           | -0.19986 |              |
|               |    | 362 -> 386 |           |           | 0.11342  |              |
|               |    | 363 -> 369 |           |           | 0.19565  |              |
|               |    | 363 -> 386 |           |           | -0.10687 |              |
| Excited State | 8: | Singlet-A  | 4.8812 eV | 254.00 nm | f=0.0387 | <S**2>=0.000 |
|               |    | 338 -> 370 |           |           | 0.14997  |              |
|               |    | 338 -> 383 |           |           | -0.14017 |              |
|               |    | 338 -> 385 |           |           | -0.10686 |              |
|               |    | 340 -> 370 |           |           | -0.14274 |              |
|               |    | 340 -> 383 |           |           | 0.13206  |              |

345 -> 370 0.16277  
 345 -> 371 0.10649  
 345 -> 383 -0.14863  
 345 -> 385 -0.11269  
 346 -> 370 -0.12811  
 346 -> 383 0.11688

Excited State 9: Singlet-A 4.9008 eV 252.99 nm f=0.0282 <S\*\*2>=0.000  
 333 -> 369 -0.10280  
 339 -> 369 0.10157  
 342 -> 369 0.12432  
 344 -> 369 0.14294  
 346 -> 369 0.10396  
 347 -> 369 0.10860  
 357 -> 369 0.11657  
 367 -> 369 0.14685

Triplets:

Excited State 1: Triplet-A 3.7725 eV 328.65 nm f=0.0000 <S\*\*2>=2.000  
 349 -> 371 -0.12414  
 349 -> 374 0.10744  
 352 -> 371 -0.11782  
 352 -> 374 -0.11660  
 352 -> 376 -0.11124  
 356 -> 371 -0.13966  
 356 -> 374 0.15399  
 358 -> 374 -0.11021  
 359 -> 371 0.15530  
 359 -> 374 -0.19296  
 359 -> 379 0.10259  
 360 -> 371 0.12164  
 360 -> 374 -0.16941

Excited State 2: Triplet-A 3.7905 eV 327.09 nm f=0.0000 <S\*\*2>=2.000  
 353 -> 372 -0.10658  
 355 -> 375 -0.23405  
 357 -> 375 -0.12739  
 358 -> 372 -0.12884  
 358 -> 378 0.12655  
 359 -> 372 -0.15260  
 359 -> 377 -0.11243  
 359 -> 378 0.14849  
 360 -> 372 0.13936  
 360 -> 377 0.10098  
 360 -> 378 -0.13322

Excited State 3: Triplet-A 3.8036 eV 325.97 nm f=0.0000 <S\*\*2>=2.000  
 351 -> 369 0.14103  
 351 -> 372 0.11961  
 351 -> 375 -0.11164  
 353 -> 369 -0.18437  
 355 -> 369 -0.13172  
 356 -> 369 -0.11196  
 357 -> 369 0.23351  
 357 -> 372 -0.21356  
 357 -> 373 -0.15658  
 357 -> 378 -0.16448

Excited State 4: Triplet-A 3.8097 eV 325.44 nm f=0.0000 <S\*\*2>=2.000  
 366 -> 370 0.18425  
 366 -> 371 0.11298  
 366 -> 383 -0.16314  
 366 -> 385 -0.12259  
 368 -> 370 0.19084  
 368 -> 371 0.11733  
 368 -> 383 -0.16598  
 368 -> 385 -0.12453

Excited State 5: Triplet-A 3.8288 eV 323.82 nm f=0.0000 <S\*\*2>=2.000  
 354 -> 376 0.22179  
 358 -> 374 0.19161  
 358 -> 379 0.24108  
 359 -> 374 -0.17505  
 359 -> 379 -0.19645

Excited State 6: Triplet-A 4.0017 eV 309.83 nm f=0.0000 <S\*\*2>=2.000  
 364 -> 370 -0.18371

|                   |           |           |           |          |              |  |
|-------------------|-----------|-----------|-----------|----------|--------------|--|
| 364 -> 371        | -0.11608  |           |           |          |              |  |
| 364 -> 383        | 0.16416   |           |           |          |              |  |
| 364 -> 385        | 0.12271   |           |           |          |              |  |
| 365 -> 370        | -0.11744  |           |           |          |              |  |
| 365 -> 383        | 0.10512   |           |           |          |              |  |
| Excited State 7:  | Triplet-A | 4.0236 eV | 308.14 nm | f=0.0000 | <S**2>=2.000 |  |
| 352 -> 374        | 0.20405   |           |           |          |              |  |
| 352 -> 376        | 0.13510   |           |           |          |              |  |
| 366 -> 369        | -0.10438  |           |           |          |              |  |
| 367 -> 369        | 0.11964   |           |           |          |              |  |
| 368 -> 369        | 0.13854   |           |           |          |              |  |
| Excited State 8:  | Triplet-A | 4.0244 eV | 308.08 nm | f=0.0000 | <S**2>=2.000 |  |
| 352 -> 374        | -0.19865  |           |           |          |              |  |
| 352 -> 376        | -0.13016  |           |           |          |              |  |
| 366 -> 369        | -0.11325  |           |           |          |              |  |
| 367 -> 369        | 0.12313   |           |           |          |              |  |
| 368 -> 369        | 0.14599   |           |           |          |              |  |
| Excited State 9:  | Triplet-A | 4.0305 eV | 307.61 nm | f=0.0000 | <S**2>=2.000 |  |
| 355 -> 375        | 0.23425   |           |           |          |              |  |
| 355 -> 377        | -0.12680  |           |           |          |              |  |
| 355 -> 378        | 0.14028   |           |           |          |              |  |
| 357 -> 378        | 0.10886   |           |           |          |              |  |
| 359 -> 375        | -0.10535  |           |           |          |              |  |
| 360 -> 375        | 0.10613   |           |           |          |              |  |
| Excited State 10: | Triplet-A | 4.0593 eV | 305.43 nm | f=0.0000 | <S**2>=2.000 |  |
| 350 -> 372        | -0.17124  |           |           |          |              |  |
| 350 -> 375        | 0.10177   |           |           |          |              |  |
| 351 -> 369        | -0.13821  |           |           |          |              |  |
| 351 -> 372        | -0.22672  |           |           |          |              |  |
| 351 -> 375        | 0.19149   |           |           |          |              |  |
| 351 -> 378        | -0.10563  |           |           |          |              |  |
| 355 -> 378        | 0.10809   |           |           |          |              |  |
| 357 -> 369        | 0.17261   |           |           |          |              |  |
| Excited State 11: | Triplet-A | 4.0732 eV | 304.39 nm | f=0.0000 | <S**2>=2.000 |  |
| 352 -> 376        | 0.10478   |           |           |          |              |  |
| 354 -> 376        | -0.21838  |           |           |          |              |  |
| 354 -> 379        | -0.27856  |           |           |          |              |  |
| 356 -> 376        | -0.11995  |           |           |          |              |  |
| 358 -> 376        | -0.13136  |           |           |          |              |  |
| 359 -> 376        | 0.10836   |           |           |          |              |  |
| Excited State 12: | Triplet-A | 4.1308 eV | 300.15 nm | f=0.0000 | <S**2>=2.000 |  |
| 340 -> 375        | 0.10210   |           |           |          |              |  |
| 341 -> 375        | -0.15297  |           |           |          |              |  |
| 343 -> 375        | -0.16587  |           |           |          |              |  |
| 346 -> 375        | -0.12132  |           |           |          |              |  |
| 351 -> 372        | -0.11462  |           |           |          |              |  |
| 351 -> 375        | -0.11216  |           |           |          |              |  |
| 355 -> 372        | -0.18890  |           |           |          |              |  |
| 355 -> 375        | -0.20481  |           |           |          |              |  |
| 355 -> 402        | -0.12455  |           |           |          |              |  |
| 358 -> 375        | -0.10578  |           |           |          |              |  |
| 359 -> 375        | -0.10487  |           |           |          |              |  |
| Excited State 13: | Triplet-A | 4.1673 eV | 297.52 nm | f=0.0000 | <S**2>=2.000 |  |
| 344 -> 369        | -0.13926  |           |           |          |              |  |
| 351 -> 369        | -0.17790  |           |           |          |              |  |
| 364 -> 369        | 0.18130   |           |           |          |              |  |
| 364 -> 386        | -0.10589  |           |           |          |              |  |
| 365 -> 369        | -0.13129  |           |           |          |              |  |
| Excited State 14: | Triplet-A | 4.1834 eV | 296.37 nm | f=0.0000 | <S**2>=2.000 |  |
| 337 -> 376        | 0.14278   |           |           |          |              |  |
| 338 -> 376        | -0.10051  |           |           |          |              |  |
| 339 -> 376        | -0.10584  |           |           |          |              |  |
| 342 -> 376        | 0.12547   |           |           |          |              |  |
| 354 -> 374        | -0.11831  |           |           |          |              |  |
| 354 -> 376        | 0.16249   |           |           |          |              |  |
| 354 -> 401        | 0.11342   |           |           |          |              |  |
| 358 -> 376        | -0.12803  |           |           |          |              |  |
| 358 -> 379        | -0.12717  |           |           |          |              |  |
| Excited State 15: | Triplet-A | 4.1884 eV | 296.02 nm | f=0.0000 | <S**2>=2.000 |  |

|                   |           |           |           |          |              |  |
|-------------------|-----------|-----------|-----------|----------|--------------|--|
| 336 -> 371        | -0.10627  |           |           |          |              |  |
| 337 -> 371        | 0.13293   |           |           |          |              |  |
| 339 -> 371        | 0.11132   |           |           |          |              |  |
| 345 -> 370        | -0.10964  |           |           |          |              |  |
| 345 -> 371        | 0.16038   |           |           |          |              |  |
| 349 -> 371        | -0.10061  |           |           |          |              |  |
| 352 -> 370        | 0.13844   |           |           |          |              |  |
| 352 -> 371        | -0.19721  |           |           |          |              |  |
| 352 -> 395        | 0.10820   |           |           |          |              |  |
|                   |           |           |           |          |              |  |
| Excited State 16: | Triplet-A | 4.1962 eV | 295.47 nm | f=0.0000 | <S**2>=2.000 |  |
| 336 -> 369        | 0.11980   |           |           |          |              |  |
| 344 -> 369        | 0.12894   |           |           |          |              |  |
| 350 -> 369        | 0.10755   |           |           |          |              |  |
| 351 -> 369        | 0.14293   |           |           |          |              |  |
| 351 -> 373        | -0.10022  |           |           |          |              |  |
| 353 -> 369        | -0.13770  |           |           |          |              |  |
| 357 -> 372        | 0.12278   |           |           |          |              |  |
| 364 -> 369        | 0.14640   |           |           |          |              |  |
| 365 -> 369        | -0.11494  |           |           |          |              |  |
|                   |           |           |           |          |              |  |
| Excited State 17: | Triplet-A | 4.3507 eV | 284.97 nm | f=0.0000 | <S**2>=2.000 |  |
| 345 -> 370        | 0.11031   |           |           |          |              |  |
| 345 -> 383        | -0.10504  |           |           |          |              |  |
| 362 -> 370        | 0.11926   |           |           |          |              |  |
| 362 -> 383        | -0.10687  |           |           |          |              |  |
| 363 -> 370        | 0.16708   |           |           |          |              |  |
| 363 -> 371        | 0.11099   |           |           |          |              |  |
| 363 -> 383        | -0.14833  |           |           |          |              |  |
| 363 -> 385        | -0.10902  |           |           |          |              |  |
|                   |           |           |           |          |              |  |
| Excited State 18: | Triplet-A | 4.4625 eV | 277.84 nm | f=0.0000 | <S**2>=2.000 |  |
| 340 -> 370        | -0.11615  |           |           |          |              |  |
| 340 -> 383        | 0.11036   |           |           |          |              |  |
| 343 -> 370        | -0.12532  |           |           |          |              |  |
| 343 -> 383        | 0.11897   |           |           |          |              |  |
| 349 -> 370        | -0.11098  |           |           |          |              |  |
| 349 -> 383        | 0.10369   |           |           |          |              |  |
|                   |           |           |           |          |              |  |
| Excited State 19: | Triplet-A | 4.5514 eV | 272.41 nm | f=0.0000 | <S**2>=2.000 |  |
| 338 -> 370        | 0.13845   |           |           |          |              |  |
| 338 -> 383        | -0.13248  |           |           |          |              |  |
| 338 -> 385        | -0.10188  |           |           |          |              |  |
| 340 -> 370        | -0.12315  |           |           |          |              |  |
| 340 -> 383        | 0.11704   |           |           |          |              |  |
| 345 -> 370        | 0.17580   |           |           |          |              |  |
| 345 -> 371        | 0.11465   |           |           |          |              |  |
| 345 -> 383        | -0.16579  |           |           |          |              |  |
| 345 -> 385        | -0.12654  |           |           |          |              |  |
| 346 -> 370        | -0.13366  |           |           |          |              |  |
| 346 -> 383        | 0.12560   |           |           |          |              |  |
|                   |           |           |           |          |              |  |
| Excited State 20: | Triplet-A | 4.5623 eV | 271.76 nm | f=0.0000 | <S**2>=2.000 |  |
| 335 -> 369        | -0.10772  |           |           |          |              |  |
| 336 -> 369        | 0.11387   |           |           |          |              |  |
| 362 -> 369        | 0.17624   |           |           |          |              |  |
| 362 -> 386        | -0.10565  |           |           |          |              |  |
| 363 -> 369        | -0.18229  |           |           |          |              |  |
| 363 -> 386        | 0.10857   |           |           |          |              |  |
|                   |           |           |           |          |              |  |
| Excited State 21: | Triplet-A | 4.6509 eV | 266.58 nm | f=0.0000 | <S**2>=2.000 |  |
| 333 -> 369        | -0.10349  |           |           |          |              |  |
| 339 -> 369        | 0.10270   |           |           |          |              |  |
| 342 -> 369        | 0.12044   |           |           |          |              |  |
| 344 -> 369        | 0.14076   |           |           |          |              |  |
| 346 -> 369        | 0.10804   |           |           |          |              |  |
| 347 -> 369        | 0.10783   |           |           |          |              |  |
| 367 -> 369        | 0.13066   |           |           |          |              |  |
|                   |           |           |           |          |              |  |
| Excited State 22: | Triplet-A | 4.7346 eV | 261.87 nm | f=0.0000 | <S**2>=2.000 |  |
| 335 -> 369        | -0.10231  |           |           |          |              |  |
| 339 -> 369        | -0.10091  |           |           |          |              |  |
| 340 -> 369        | 0.10383   |           |           |          |              |  |
| 341 -> 369        | 0.12132   |           |           |          |              |  |
| 342 -> 369        | -0.15186  |           |           |          |              |  |
| 344 -> 369        | 0.15156   |           |           |          |              |  |
| 350 -> 369        | -0.11282  |           |           |          |              |  |

|                   |           |           |           |          |              |
|-------------------|-----------|-----------|-----------|----------|--------------|
| Excited State 23: | Triplet-A | 4.9100 eV | 252.51 nm | f=0.0000 | <S**2>=2.000 |
| 350 -> 369        | 0.15998   |           |           |          |              |
| 351 -> 369        | 0.26149   |           |           |          |              |
| 351 -> 372        | -0.14114  |           |           |          |              |
| 351 -> 373        | -0.12574  |           |           |          |              |
| 351 -> 378        | -0.12303  |           |           |          |              |
| 357 -> 369        | -0.14105  |           |           |          |              |
| Excited State 24: | Triplet-A | 4.9334 eV | 251.31 nm | f=0.0000 | <S**2>=2.000 |
| 355 -> 372        | 0.22037   |           |           |          |              |
| 355 -> 375        | 0.10893   |           |           |          |              |
| 355 -> 378        | -0.11875  |           |           |          |              |
| 358 -> 375        | -0.14308  |           |           |          |              |
| 359 -> 375        | -0.17428  |           |           |          |              |
| 360 -> 375        | 0.16604   |           |           |          |              |
| Excited State 25: | Triplet-A | 4.9377 eV | 251.10 nm | f=0.0000 | <S**2>=2.000 |
| 349 -> 374        | -0.12007  |           |           |          |              |
| 352 -> 370        | -0.14162  |           |           |          |              |
| 352 -> 371        | 0.22766   |           |           |          |              |
| 352 -> 374        | -0.16893  |           |           |          |              |
| 354 -> 371        | 0.12533   |           |           |          |              |
| 356 -> 374        | -0.11715  |           |           |          |              |
| 359 -> 371        | 0.11052   |           |           |          |              |
| 359 -> 374        | 0.11250   |           |           |          |              |
| 360 -> 371        | 0.12275   |           |           |          |              |
| Excited State 26: | Triplet-A | 4.9769 eV | 249.12 nm | f=0.0000 | <S**2>=2.000 |
| 345 -> 374        | 0.13383   |           |           |          |              |
| 352 -> 395        | 0.12409   |           |           |          |              |
| 368 -> 370        | 0.13683   |           |           |          |              |
| 368 -> 371        | -0.12301  |           |           |          |              |
| Excited State 27: | Triplet-A | 4.9847 eV | 248.73 nm | f=0.0000 | <S**2>=2.000 |
| 354 -> 401        | -0.10859  |           |           |          |              |
| 366 -> 370        | -0.10889  |           |           |          |              |
| 366 -> 376        | -0.12268  |           |           |          |              |
| 368 -> 374        | -0.10607  |           |           |          |              |
| 368 -> 376        | 0.12322   |           |           |          |              |
| Excited State 28: | Triplet-A | 4.9946 eV | 248.24 nm | f=0.0000 | <S**2>=2.000 |
| 354 -> 374        | -0.19002  |           |           |          |              |
| 354 -> 376        | 0.14947   |           |           |          |              |
| 354 -> 379        | -0.19408  |           |           |          |              |
| 358 -> 376        | 0.17365   |           |           |          |              |
| 358 -> 379        | 0.10319   |           |           |          |              |
| 359 -> 376        | -0.14039  |           |           |          |              |

#### 4.2. 2-Ag, 2-Cu and 3-Ag

In the case of the 3D  $[M(TT)Cl]_n$  ( $M = Ag, Cu$ ) and  $[Ag_3(TT)_4]_n(NO_3)_{3n} \cdot 6nH_2O$  polymeric structures, the  $M(TT)_3Cl$  and the  $Ag(TT)_4^+$  models, respectively, have been adopted (see Figure S26). For these systems geometry optimizations have been performed without constraints, starting from the X-ray structures. In  $M(TT)_3Cl$  optimized complexes, the M-N and M-Cl bonds measure 2.426, 2.448 Å ( $M=Ag$ ) and 2.168, 2.274 Å ( $M=Cu$ ), respectively, to be compared with the X-ray values 2.3544(10), 2.4562(5) Å (**2-Ag**) and 2.130, 2.257 Å (**2-Cu**). In  $Ag(TT)_4^+$  complex, the Ag-N bond measures 2.346-2.363 Å, to be compared with the X-ray value 2.308(4) Å.

The results of DFT/TDDFT calculations on  $M(TT)_3Cl$  are reported in Figures S27 (scheme of excited states), S28, S29 (Plots of the MOs mainly involved in the lowest energy transitions) and Tables S8, S9 (Gaussian16 output of the  $S_0 \rightarrow S_n$  and  $T_0 \rightarrow T_n$  transitions), while those on  $Ag(TT)_4^+$  are reported in Figures S30 (scheme of excited states), S31 (Plot of the MOs mainly involved in the lowest energy transitions) and Table S10 (Gaussian16 output of the  $S_0 \rightarrow S_n$  and  $T_0 \rightarrow T_n$  transitions).



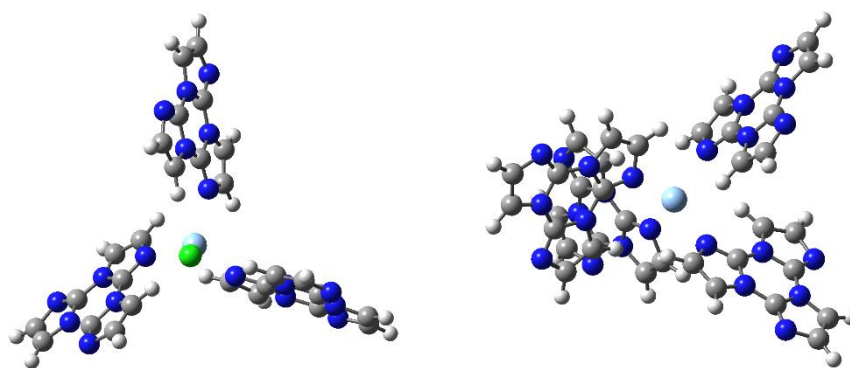

**Figure S26.** Discrete model compounds of **2-Ag**,  $\text{Ag}(\text{TT})_3\text{Cl}$  (left), and **3-Ag**,  $\text{Ag}(\text{TT})_4^+$  (right).

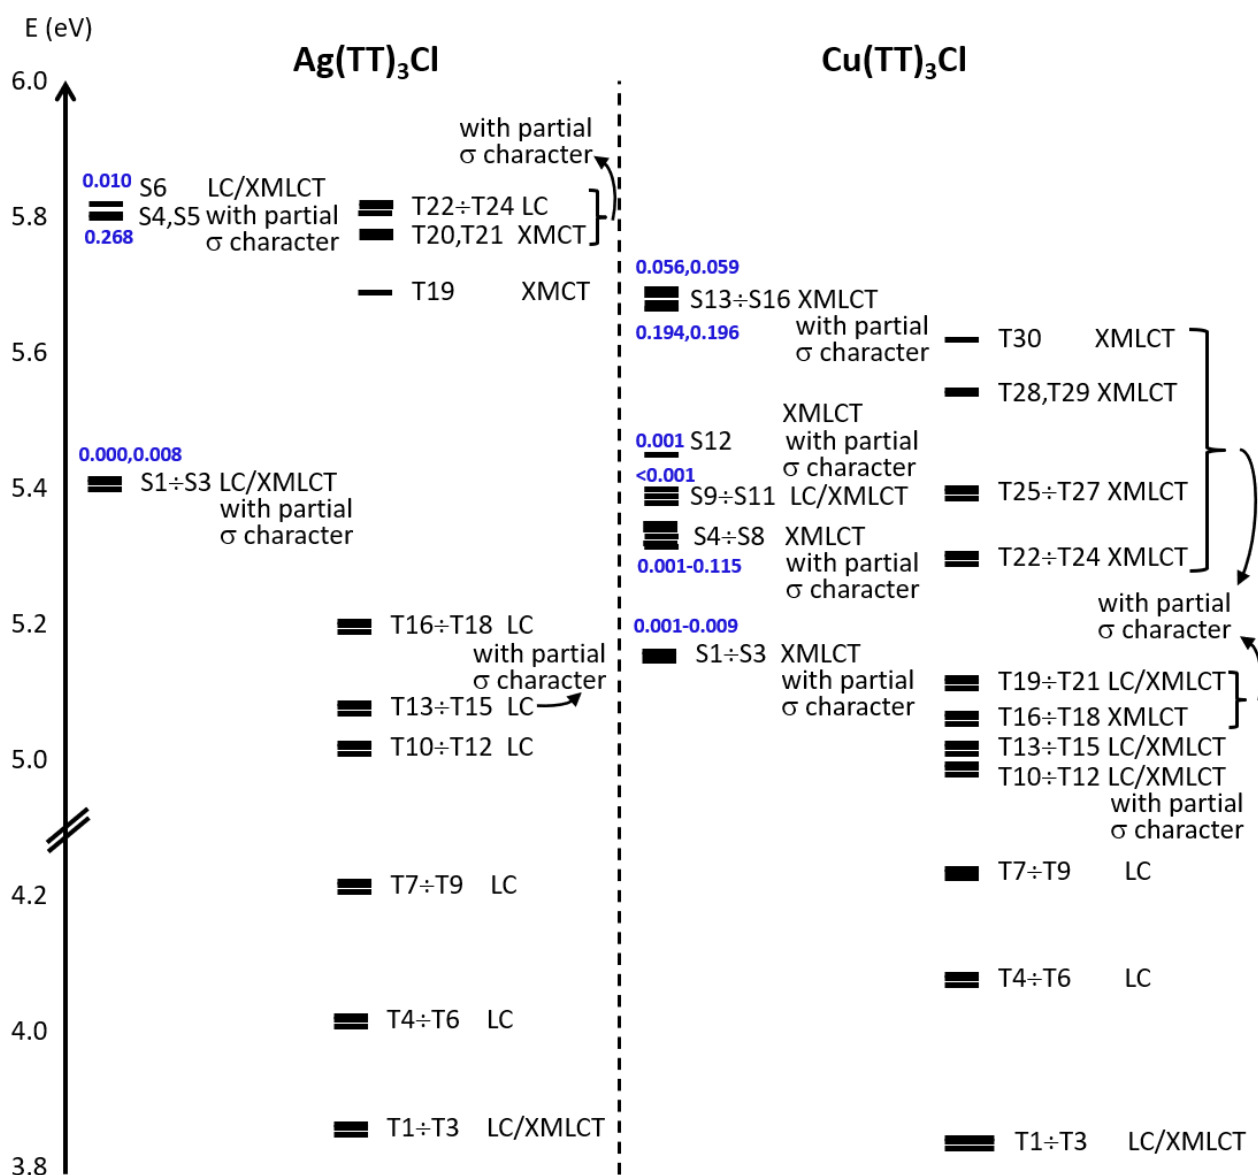

**Figure S27.** Scheme of singlet and triplet electronic levels with oscillator strengths (for singlet states, in blue) and character for model compounds  $\text{Ag}(\text{TT})_3\text{Cl}$  (at  $\omega\text{B97X}/\text{def2-TZVP}$  level, left) and  $\text{Cu}(\text{TT})_3\text{Cl}$  (at  $\omega\text{B97X}/6\text{-311++G(d,p)}$  level, right).

Ag(TT)<sub>3</sub>Cl: HOMOs

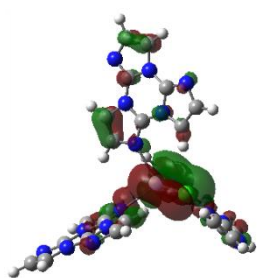

MO = 158 (HOMO-13)

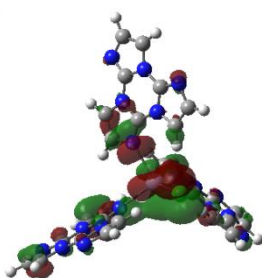

159 (HOMO-12)

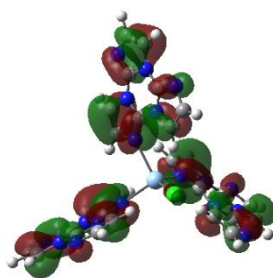

160 (HOMO-11)

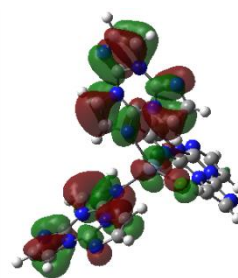

161 (HOMO-10)

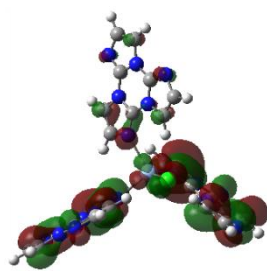

162 (HOMO-9)

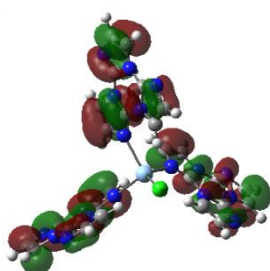

163 (HOMO-8)

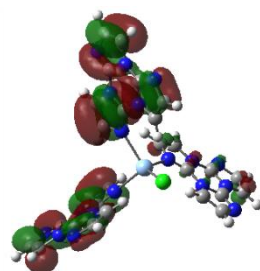

164 (HOMO-7)

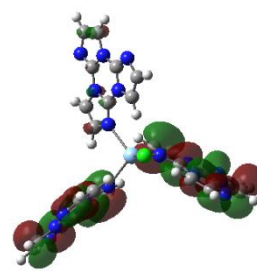

165 (HOMO-6)

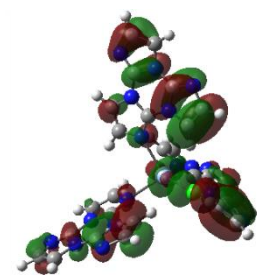

166 (HOMO-5)

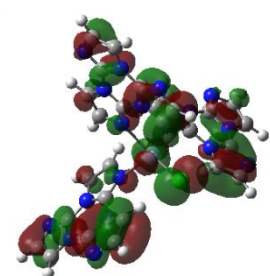

167 (HOMO-4)

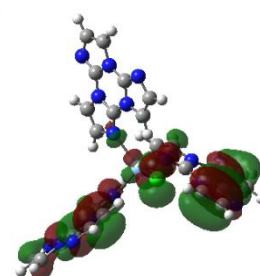

168 (HOMO-3)

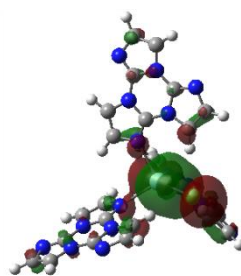

169 (HOMO-2)

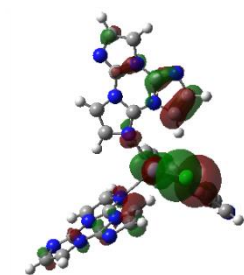

170 (HOMO-1)

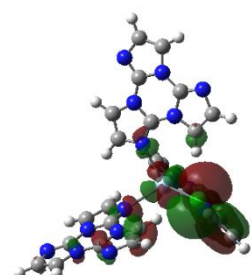

171 (HOMO)

Ag(TT)<sub>3</sub>Cl: LUMOs

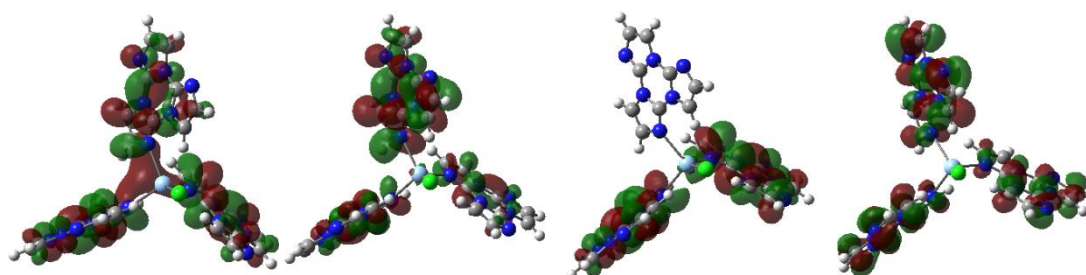

MO = 172 (LUMO)

173 (LUMO+1)

174 (LUMO+2)

175 (LUMO+3)

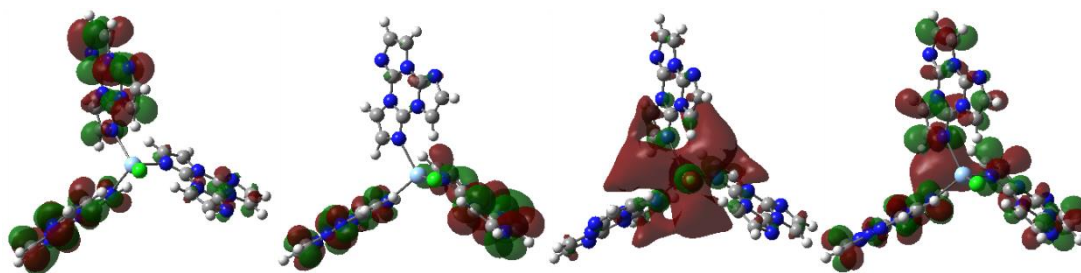

176 (LUMO+4)

177 (LUMO+5)

178 (LUMO+6)

179 (LUMO+7)

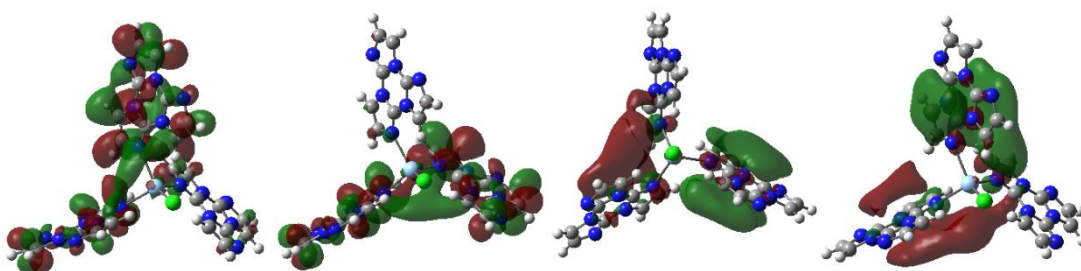

180 (LUMO+8)

181 (LUMO+9)

182 (LUMO+10)

183 (LUMO+11)

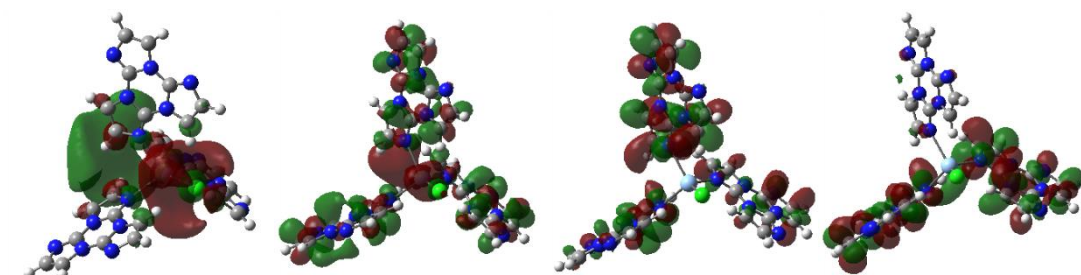

184 (LUMO+12)

185 (LUMO+13)

186 (LUMO+14)

187 (LUMO+15)

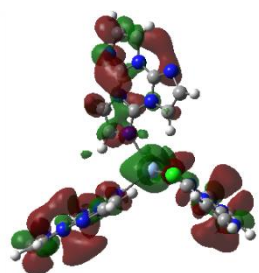

188 (LUMO+16)

**Figure S28.** Plots of the  $\omega$ B97X/def2-TZVP MOs mainly involved in the lowest energy transitions of  $\text{Ag}(\text{TT})_3\text{Cl}$  (Isosurfaces value 0.02).

**$\text{Cu}(\text{TT})_3\text{Cl}$ : HOMOs**

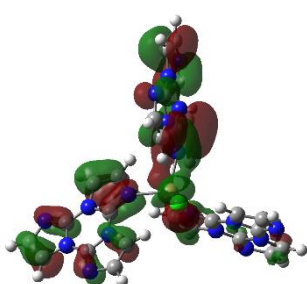

MO = 161 (HOMO-13)

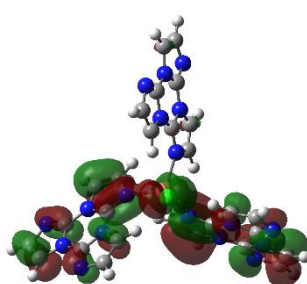

162 (HOMO-12)

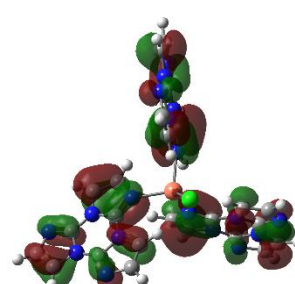

163 (HOMO-11)

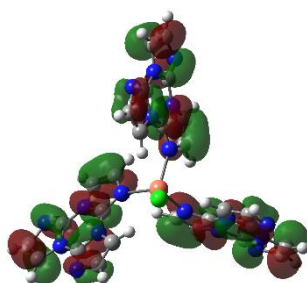

166 (HOMO-10)

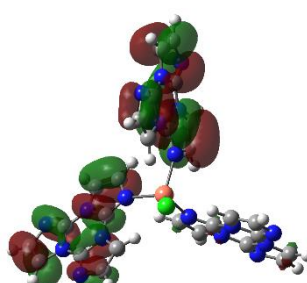

167 (HOMO-9)

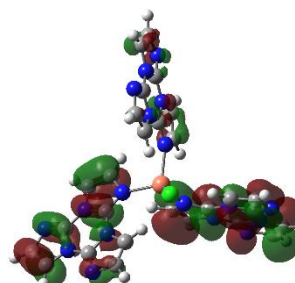

168 (HOMO-8)

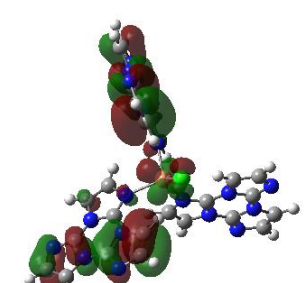

169 (HOMO-7)

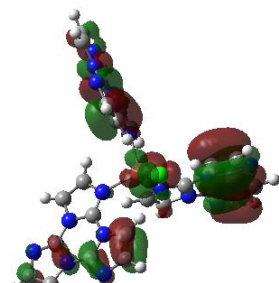

170 (HOMO-6)

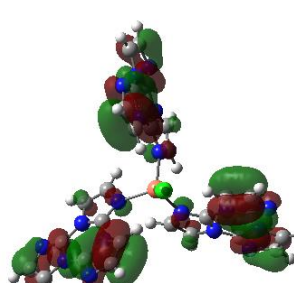

171 (HOMO-5)

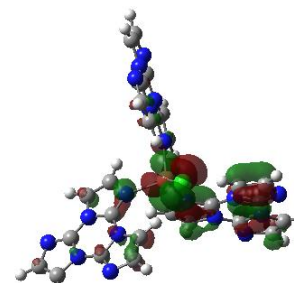

172 (HOMO-4)



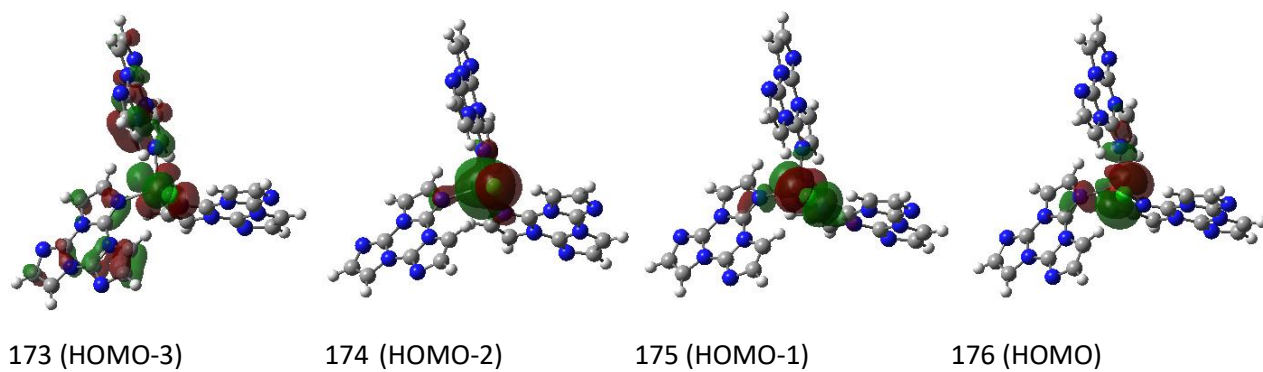

**Cu(TT)<sub>3</sub>Cl: LUMOs**

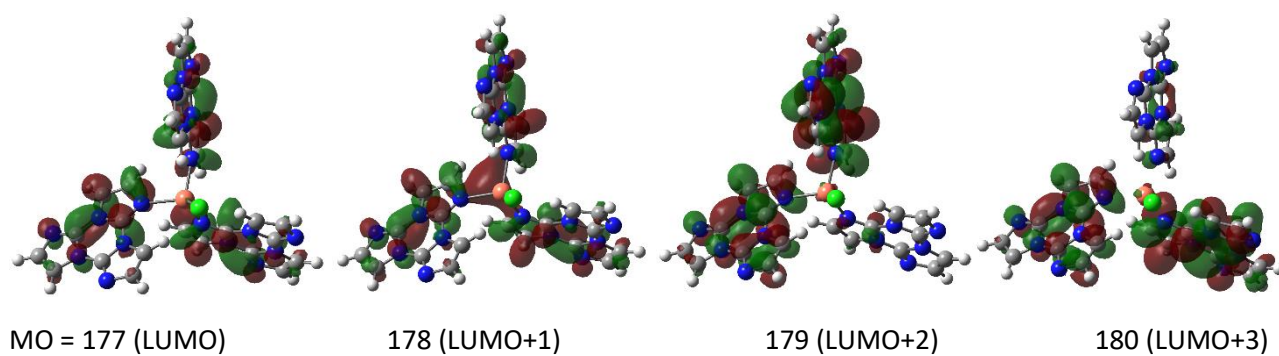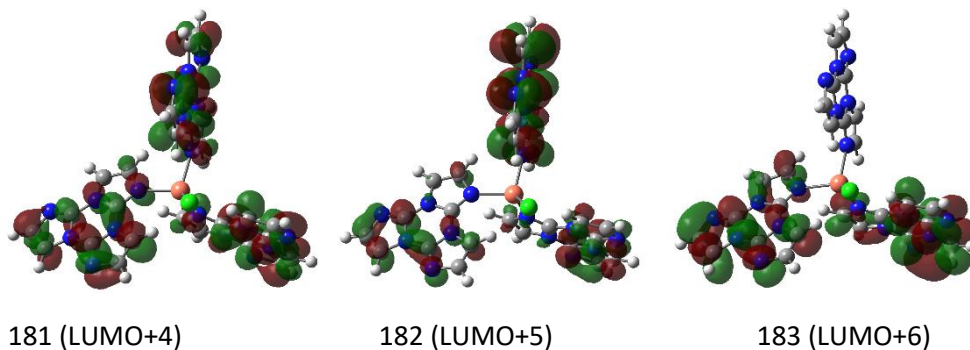

**Figure S29.** Plots of the  $\omega$ B97X/6-311++G(d,p) MOs mainly involved in the lowest energy transitions of Cu(TT)<sub>3</sub>Cl (Isosurfaces value 0.02).

**Table S8.** First TD- $\omega$ B97X/def2-TZVP  $S_0 \rightarrow S_n$  and  $T_0 \rightarrow T_n$  transitions computed for the optimized geometry of  $\text{Ag}(\text{TT})_3\text{Cl}$ .

Singlets:

|               |    |           |           |           |          |              |
|---------------|----|-----------|-----------|-----------|----------|--------------|
| Excited State | 1: | Singlet-A | 5.4066 eV | 229.32 nm | f=0.0083 | <S**2>=0.000 |
| 163 -> 173    |    | -0.24365  |           |           |          |              |
| 164 -> 172    |    | -0.23516  |           |           |          |              |
| 164 -> 173    |    | -0.17898  |           |           |          |              |
| 165 -> 172    |    | -0.12451  |           |           |          |              |
| 165 -> 174    |    | 0.18025   |           |           |          |              |
| 166 -> 175    |    | -0.12192  |           |           |          |              |
| 166 -> 176    |    | 0.24997   |           |           |          |              |
| 166 -> 177    |    | 0.11634   |           |           |          |              |
| 167 -> 175    |    | -0.24310  |           |           |          |              |
| 168 -> 177    |    | -0.19198  |           |           |          |              |
| 170 -> 175    |    | 0.11605   |           |           |          |              |
| Excited State | 2: | Singlet-A | 5.4068 eV | 229.31 nm | f=0.0083 | <S**2>=0.000 |
| 163 -> 174    |    | 0.23820   |           |           |          |              |
| 164 -> 172    |    | -0.12606  |           |           |          |              |
| 164 -> 174    |    | -0.18314  |           |           |          |              |
| 165 -> 172    |    | 0.23358   |           |           |          |              |
| 165 -> 173    |    | -0.18085  |           |           |          |              |
| 166 -> 176    |    | 0.13561   |           |           |          |              |
| 166 -> 177    |    | -0.16010  |           |           |          |              |
| 167 -> 175    |    | -0.11515  |           |           |          |              |
| 167 -> 177    |    | 0.21540   |           |           |          |              |
| 168 -> 175    |    | 0.21702   |           |           |          |              |
| 168 -> 176    |    | 0.18842   |           |           |          |              |
| Excited State | 3: | Singlet-A | 5.4142 eV | 229.00 nm | f=0.0000 | <S**2>=0.000 |
| 163 -> 172    |    | 0.26539   |           |           |          |              |
| 164 -> 173    |    | 0.25739   |           |           |          |              |
| 165 -> 174    |    | 0.26047   |           |           |          |              |
| 166 -> 175    |    | 0.26418   |           |           |          |              |
| 167 -> 176    |    | -0.24215  |           |           |          |              |
| 168 -> 177    |    | -0.24505  |           |           |          |              |
| 169 -> 175    |    | -0.10068  |           |           |          |              |
| 170 -> 176    |    | 0.11660   |           |           |          |              |
| 171 -> 177    |    | 0.11766   |           |           |          |              |
| Excited State | 4: | Singlet-A | 5.8026 eV | 213.67 nm | f=0.2680 | <S**2>=0.000 |
| 163 -> 173    |    | -0.11269  |           |           |          |              |
| 164 -> 175    |    | -0.11911  |           |           |          |              |
| 166 -> 173    |    | 0.37150   |           |           |          |              |
| 167 -> 172    |    | 0.28985   |           |           |          |              |
| 167 -> 173    |    | 0.12392   |           |           |          |              |
| 168 -> 174    |    | -0.22490  |           |           |          |              |
| 169 -> 173    |    | -0.15255  |           |           |          |              |
| 170 -> 172    |    | -0.13101  |           |           |          |              |
| 170 -> 173    |    | -0.10233  |           |           |          |              |
| 171 -> 174    |    | 0.10235   |           |           |          |              |
| Excited State | 5: | Singlet-A | 5.8028 eV | 213.66 nm | f=0.2683 | <S**2>=0.000 |
| 163 -> 174    |    | -0.10935  |           |           |          |              |
| 165 -> 175    |    | -0.10120  |           |           |          |              |
| 166 -> 174    |    | 0.24147   |           |           |          |              |
| 167 -> 174    |    | -0.29978  |           |           |          |              |
| 168 -> 172    |    | 0.30069   |           |           |          |              |
| 168 -> 173    |    | -0.21771  |           |           |          |              |
| 169 -> 174    |    | -0.15071  |           |           |          |              |
| 170 -> 174    |    | 0.10350   |           |           |          |              |
| 171 -> 172    |    | -0.12929  |           |           |          |              |
| 171 -> 173    |    | 0.10307   |           |           |          |              |
| Excited State | 6: | Singlet-A | 5.8284 eV | 212.72 nm | f=0.0104 | <S**2>=0.000 |
| 163 -> 175    |    | -0.15003  |           |           |          |              |
| 164 -> 176    |    | 0.13030   |           |           |          |              |
| 165 -> 177    |    | 0.13090   |           |           |          |              |
| 166 -> 172    |    | 0.30239   |           |           |          |              |
| 167 -> 173    |    | 0.30049   |           |           |          |              |
| 168 -> 174    |    | 0.31279   |           |           |          |              |
| 169 -> 172    |    | -0.13842  |           |           |          |              |
| 170 -> 173    |    | -0.15329  |           |           |          |              |
| 171 -> 174    |    | -0.15371  |           |           |          |              |
| Excited State | 7: | Singlet-A | 6.0300 eV | 205.61 nm | f=0.6092 | <S**2>=0.000 |
| 163 -> 173    |    | 0.14925   |           |           |          |              |

163 -> 176 0.18453  
 163 -> 177 0.11490  
 164 -> 172 0.18840  
 164 -> 173 0.12009  
 164 -> 175 -0.15462  
 164 -> 176 0.12879  
 165 -> 172 0.15727  
 165 -> 174 -0.12529  
 165 -> 177 -0.15730  
 166 -> 176 0.17808  
 166 -> 177 0.12490  
 167 -> 175 -0.14283  
 168 -> 177 -0.16150

Excited State 8: Singlet-A 6.0301 eV 205.61 nm f=0.6075 <S\*\*2>=0.000  
 161 -> 175 -0.10134  
 163 -> 174 0.14765  
 163 -> 176 -0.12187  
 163 -> 177 0.18074  
 164 -> 172 -0.15902  
 164 -> 174 -0.12475  
 164 -> 177 -0.14269  
 165 -> 172 0.18795  
 165 -> 173 -0.12310  
 165 -> 175 -0.11405  
 165 -> 176 -0.16147  
 166 -> 176 -0.15756  
 166 -> 177 0.11309  
 167 -> 175 0.11231  
 167 -> 177 -0.16616  
 168 -> 175 -0.12882  
 168 -> 176 -0.14211

Excited State 9: Singlet-A 6.0573 eV 204.68 nm f=0.2063 <S\*\*2>=0.000  
 159 -> 178 -0.11423  
 160 -> 173 0.15729  
 161 -> 172 -0.13919  
 163 -> 176 0.13881  
 164 -> 175 -0.17169  
 165 -> 176 0.10706  
 168 -> 178 0.15618  
 171 -> 178 0.28944  
 171 -> 184 0.18322

Excited State 10: Singlet-A 6.0582 eV 204.65 nm f=0.2084 <S\*\*2>=0.000  
 158 -> 178 0.11406  
 160 -> 174 -0.15631  
 162 -> 172 -0.13849  
 163 -> 177 -0.13628  
 165 -> 175 0.14354  
 165 -> 177 0.12202  
 167 -> 178 0.15054  
 170 -> 178 0.28879  
 170 -> 184 0.18278

Triplets:

Excited State 1: Triplet-A 3.8608 eV 321.13 nm f=0.0000 <S\*\*2>=2.000  
 163 -> 172 0.16006  
 164 -> 173 0.15789  
 164 -> 176 0.10768  
 165 -> 174 0.11043  
 166 -> 173 0.10397  
 166 -> 175 0.30244  
 166 -> 176 -0.10174  
 167 -> 173 0.17434  
 167 -> 176 -0.22275  
 168 -> 174 0.13857  
 168 -> 177 -0.18822  
 169 -> 175 -0.10681  
 170 -> 176 0.11898

Excited State 2: Triplet-A 3.8611 eV 321.11 nm f=0.0000 <S\*\*2>=2.000  
 163 -> 173 0.13088  
 164 -> 172 0.13625  
 165 -> 174 -0.13250  
 166 -> 173 0.16721

|               |          |           |           |           |          |              |
|---------------|----------|-----------|-----------|-----------|----------|--------------|
| 166 -> 176    | -0.20912 |           |           |           |          |              |
| 166 -> 177    | -0.12497 |           |           |           |          |              |
| 167 -> 175    | 0.24311  |           |           |           |          |              |
| 168 -> 174    | -0.16775 |           |           |           |          |              |
| 168 -> 175    | 0.10774  |           |           |           |          |              |
| 168 -> 177    | 0.23702  |           |           |           |          |              |
| 170 -> 175    | -0.11243 |           |           |           |          |              |
| 171 -> 177    | -0.11081 |           |           |           |          |              |
|               |          |           |           |           |          |              |
| Excited State | 3:       | Triplet-A | 3.8612 eV | 321.10 nm | f=0.0000 | <S**2>=2.000 |
| 163 -> 174    |          | 0.13300   |           |           |          |              |
| 164 -> 174    |          | -0.10469  |           |           |          |              |
| 165 -> 172    |          | 0.14021   |           |           |          |              |
| 166 -> 174    |          | 0.12035   |           |           |          |              |
| 166 -> 176    |          | 0.13520   |           |           |          |              |
| 166 -> 177    |          | -0.14403  |           |           |          |              |
| 167 -> 174    |          | -0.15858  |           |           |          |              |
| 167 -> 175    |          | -0.13765  |           |           |          |              |
| 167 -> 176    |          | -0.12675  |           |           |          |              |
| 167 -> 177    |          | 0.18824   |           |           |          |              |
| 168 -> 173    |          | -0.11579  |           |           |          |              |
| 168 -> 175    |          | 0.21736   |           |           |          |              |
| 168 -> 176    |          | 0.18114   |           |           |          |              |
|               |          |           |           |           |          |              |
| Excited State | 4:       | Triplet-A | 4.1075 eV | 301.85 nm | f=0.0000 | <S**2>=2.000 |
| 160 -> 175    |          | -0.14242  |           |           |          |              |
| 161 -> 176    |          | -0.13221  |           |           |          |              |
| 162 -> 177    |          | 0.10645   |           |           |          |              |
| 163 -> 172    |          | 0.23742   |           |           |          |              |
| 163 -> 175    |          | -0.13499  |           |           |          |              |
| 164 -> 173    |          | 0.21664   |           |           |          |              |
| 164 -> 176    |          | 0.21685   |           |           |          |              |
| 165 -> 174    |          | 0.14502   |           |           |          |              |
| 165 -> 177    |          | 0.15895   |           |           |          |              |
| 166 -> 175    |          | -0.11744  |           |           |          |              |
|               |          |           |           |           |          |              |
| Excited State | 5:       | Triplet-A | 4.1077 eV | 301.84 nm | f=0.0000 | <S**2>=2.000 |
| 161 -> 175    |          | 0.11403   |           |           |          |              |
| 162 -> 177    |          | -0.12920  |           |           |          |              |
| 163 -> 173    |          | 0.16850   |           |           |          |              |
| 163 -> 176    |          | 0.16381   |           |           |          |              |
| 163 -> 177    |          | 0.11766   |           |           |          |              |
| 164 -> 172    |          | 0.19719   |           |           |          |              |
| 164 -> 175    |          | -0.11512  |           |           |          |              |
| 165 -> 172    |          | 0.15263   |           |           |          |              |
| 165 -> 174    |          | -0.18392  |           |           |          |              |
| 165 -> 177    |          | -0.19942  |           |           |          |              |
|               |          |           |           |           |          |              |
| Excited State | 6:       | Triplet-A | 4.1078 eV | 301.83 nm | f=0.0000 | <S**2>=2.000 |
| 162 -> 175    |          | 0.10142   |           |           |          |              |
| 163 -> 174    |          | -0.17118  |           |           |          |              |
| 163 -> 176    |          | 0.11516   |           |           |          |              |
| 163 -> 177    |          | -0.16318  |           |           |          |              |
| 164 -> 172    |          | 0.14208   |           |           |          |              |
| 164 -> 174    |          | 0.14716   |           |           |          |              |
| 164 -> 177    |          | 0.13487   |           |           |          |              |
| 165 -> 172    |          | -0.20446  |           |           |          |              |
| 165 -> 173    |          | 0.12456   |           |           |          |              |
| 165 -> 176    |          | 0.15048   |           |           |          |              |
|               |          |           |           |           |          |              |
| Excited State | 7:       | Triplet-A | 4.2075 eV | 294.67 nm | f=0.0000 | <S**2>=2.000 |
| 160 -> 172    |          | -0.23662  |           |           |          |              |
| 161 -> 173    |          | 0.18896   |           |           |          |              |
| 162 -> 174    |          | -0.17691  |           |           |          |              |
| 163 -> 172    |          | 0.10224   |           |           |          |              |
| 163 -> 175    |          | 0.15810   |           |           |          |              |
| 163 -> 179    |          | 0.13245   |           |           |          |              |
| 164 -> 173    |          | 0.13170   |           |           |          |              |
| 164 -> 176    |          | -0.12837  |           |           |          |              |
| 164 -> 180    |          | -0.15024  |           |           |          |              |
| 165 -> 174    |          | 0.12366   |           |           |          |              |
| 165 -> 177    |          | -0.13058  |           |           |          |              |
| 165 -> 181    |          | -0.14252  |           |           |          |              |
| 166 -> 172    |          | 0.12086   |           |           |          |              |
| 167 -> 173    |          | 0.11230   |           |           |          |              |
| 168 -> 174    |          | 0.10640   |           |           |          |              |
|               |          |           |           |           |          |              |
| Excited State | 8:       | Triplet-A | 4.2079 eV | 294.65 nm | f=0.0000 | <S**2>=2.000 |



|                   |           |           |           |          |              |
|-------------------|-----------|-----------|-----------|----------|--------------|
| 160 -> 173        | 0.18069   |           |           |          |              |
| 160 -> 174        | 0.10537   |           |           |          |              |
| 161 -> 172        | -0.15427  |           |           |          |              |
| 161 -> 173        | -0.12633  |           |           |          |              |
| 162 -> 172        | 0.15284   |           |           |          |              |
| 162 -> 174        | -0.14252  |           |           |          |              |
| 163 -> 173        | -0.10662  |           |           |          |              |
| 163 -> 180        | 0.11646   |           |           |          |              |
| 164 -> 175        | -0.13154  |           |           |          |              |
| 164 -> 179        | -0.10323  |           |           |          |              |
| 165 -> 177        | -0.10950  |           |           |          |              |
| 165 -> 181        | -0.11163  |           |           |          |              |
| 167 -> 172        | -0.11739  |           |           |          |              |
|                   |           |           |           |          |              |
| Excited State 9:  | Triplet-A | 4.2080 eV | 294.64 nm | f=0.0000 | <S**2>=2.000 |
| 160 -> 173        | -0.10450  |           |           |          |              |
| 160 -> 174        | 0.17848   |           |           |          |              |
| 161 -> 172        | 0.15185   |           |           |          |              |
| 161 -> 174        | 0.14029   |           |           |          |              |
| 162 -> 172        | 0.15239   |           |           |          |              |
| 162 -> 173        | -0.12631  |           |           |          |              |
| 163 -> 174        | -0.10399  |           |           |          |              |
| 163 -> 181        | 0.11331   |           |           |          |              |
| 164 -> 175        | 0.10940   |           |           |          |              |
| 164 -> 181        | -0.10645  |           |           |          |              |
| 165 -> 175        | -0.10848  |           |           |          |              |
| 165 -> 176        | -0.10523  |           |           |          |              |
| 165 -> 179        | -0.10168  |           |           |          |              |
| 165 -> 180        | -0.10127  |           |           |          |              |
| 168 -> 172        | -0.11984  |           |           |          |              |
|                   |           |           |           |          |              |
| Excited State 10: | Triplet-A | 5.0247 eV | 246.75 nm | f=0.0000 | <S**2>=2.000 |
| 160 -> 179        | 0.10018   |           |           |          |              |
| 160 -> 180        | -0.10347  |           |           |          |              |
| 161 -> 180        | 0.15353   |           |           |          |              |
| 163 -> 173        | 0.13985   |           |           |          |              |
| 163 -> 175        | 0.16889   |           |           |          |              |
| 164 -> 173        | 0.22429   |           |           |          |              |
| 164 -> 175        | 0.17570   |           |           |          |              |
| 164 -> 176        | -0.15868  |           |           |          |              |
| 164 -> 186        | 0.11716   |           |           |          |              |
| 166 -> 172        | -0.15059  |           |           |          |              |
| 166 -> 173        | -0.14066  |           |           |          |              |
| 166 -> 176        | -0.11815  |           |           |          |              |
| 167 -> 173        | -0.12039  |           |           |          |              |
| 167 -> 176        | -0.11274  |           |           |          |              |
|                   |           |           |           |          |              |
| Excited State 11: | Triplet-A | 5.0249 eV | 246.74 nm | f=0.0000 | <S**2>=2.000 |
| 162 -> 181        | -0.16049  |           |           |          |              |
| 163 -> 173        | -0.10054  |           |           |          |              |
| 163 -> 174        | -0.10470  |           |           |          |              |
| 163 -> 175        | 0.11297   |           |           |          |              |
| 163 -> 177        | 0.11600   |           |           |          |              |
| 164 -> 175        | -0.10174  |           |           |          |              |
| 165 -> 174        | 0.23037   |           |           |          |              |
| 165 -> 175        | -0.11393  |           |           |          |              |
| 165 -> 177        | -0.20472  |           |           |          |              |
| 165 -> 187        | -0.11514  |           |           |          |              |
| 167 -> 172        | 0.11565   |           |           |          |              |
| 168 -> 172        | 0.10323   |           |           |          |              |
| 168 -> 174        | -0.15480  |           |           |          |              |
| 168 -> 177        | -0.15665  |           |           |          |              |
|                   |           |           |           |          |              |
| Excited State 12: | Triplet-A | 5.0249 eV | 246.74 nm | f=0.0000 | <S**2>=2.000 |
| 160 -> 181        | 0.11646   |           |           |          |              |
| 163 -> 174        | -0.15479  |           |           |          |              |
| 163 -> 176        | -0.10821  |           |           |          |              |
| 163 -> 177        | 0.10788   |           |           |          |              |
| 164 -> 174        | 0.13907   |           |           |          |              |
| 164 -> 175        | 0.11413   |           |           |          |              |
| 165 -> 173        | 0.12207   |           |           |          |              |
| 165 -> 175        | -0.15557  |           |           |          |              |
| 165 -> 176        | -0.12833  |           |           |          |              |
| 167 -> 174        | -0.12396  |           |           |          |              |
| 167 -> 177        | -0.10102  |           |           |          |              |
| 168 -> 172        | 0.13472   |           |           |          |              |
|                   |           |           |           |          |              |
| Excited State 13: | Triplet-A | 5.0732 eV | 244.39 nm | f=0.0000 | <S**2>=2.000 |

|            |          |
|------------|----------|
| 160 -> 175 | 0.17395  |
| 161 -> 176 | 0.17983  |
| 162 -> 177 | -0.16592 |
| 163 -> 179 | 0.13603  |
| 164 -> 180 | -0.13363 |
| 165 -> 181 | -0.11585 |
| 166 -> 172 | -0.14851 |
| 166 -> 179 | 0.13208  |
| 166 -> 191 | -0.10872 |
| 167 -> 173 | -0.13252 |
| 167 -> 176 | -0.10989 |
| 167 -> 180 | -0.12429 |
| 168 -> 174 | -0.12014 |
| 168 -> 177 | -0.10504 |
| 168 -> 181 | -0.11480 |

Excited State 14: Triplet-A 5.0738 eV 244.36 nm f=0.0000 <S\*\*2>=2.000

|            |          |
|------------|----------|
| 160 -> 176 | 0.14191  |
| 160 -> 177 | 0.11279  |
| 161 -> 175 | 0.13941  |
| 162 -> 175 | -0.10038 |
| 162 -> 177 | -0.15267 |
| 163 -> 180 | 0.10675  |
| 164 -> 179 | -0.11026 |
| 165 -> 181 | -0.10348 |
| 166 -> 173 | 0.13539  |
| 166 -> 176 | 0.12049  |
| 166 -> 180 | 0.12145  |
| 167 -> 172 | 0.11833  |
| 167 -> 179 | -0.11561 |
| 168 -> 174 | -0.11176 |
| 168 -> 177 | -0.10127 |
| 168 -> 181 | -0.10883 |

Excited State 15: Triplet-A 5.0740 eV 244.35 nm f=0.0000 <S\*\*2>=2.000

|            |          |
|------------|----------|
| 160 -> 176 | -0.11364 |
| 160 -> 177 | 0.13920  |
| 161 -> 175 | -0.11560 |
| 161 -> 177 | 0.11122  |
| 162 -> 175 | -0.11042 |
| 162 -> 176 | -0.13351 |
| 163 -> 181 | 0.10532  |
| 165 -> 179 | -0.11020 |
| 167 -> 174 | -0.12339 |
| 167 -> 177 | -0.10138 |
| 167 -> 181 | -0.11331 |
| 168 -> 172 | 0.11849  |
| 168 -> 179 | -0.11603 |

Excited State 16: Triplet-A 5.2036 eV 238.26 nm f=0.0000 <S\*\*2>=2.000

|            |          |
|------------|----------|
| 160 -> 172 | 0.18056  |
| 160 -> 175 | 0.11846  |
| 161 -> 173 | -0.21371 |
| 162 -> 174 | 0.20650  |
| 163 -> 172 | 0.13523  |
| 163 -> 179 | 0.10436  |
| 164 -> 173 | 0.10413  |
| 164 -> 180 | -0.13036 |
| 165 -> 174 | 0.10068  |
| 165 -> 181 | -0.12619 |

Excited State 17: Triplet-A 5.2048 eV 238.21 nm f=0.0000 <S\*\*2>=2.000

|            |          |
|------------|----------|
| 160 -> 173 | -0.21526 |
| 161 -> 172 | 0.18207  |
| 161 -> 173 | 0.11202  |
| 161 -> 175 | 0.11456  |
| 162 -> 174 | 0.12172  |
| 163 -> 173 | -0.10206 |
| 163 -> 180 | 0.12768  |
| 164 -> 172 | -0.13623 |
| 164 -> 179 | -0.10894 |
| 166 -> 180 | -0.10646 |

Excited State 18: Triplet-A 5.2048 eV 238.21 nm f=0.0000 <S\*\*2>=2.000

|            |          |
|------------|----------|
| 160 -> 174 | 0.21361  |
| 161 -> 174 | 0.11779  |
| 162 -> 172 | 0.18025  |
| 162 -> 173 | -0.11910 |

|                   |           |           |           |          |              |
|-------------------|-----------|-----------|-----------|----------|--------------|
| 162 -> 175        | 0.10530   |           |           |          |              |
| 163 -> 181        | -0.12409  |           |           |          |              |
| 165 -> 172        | 0.13532   |           |           |          |              |
| 165 -> 179        | 0.10857   |           |           |          |              |
| Excited State 19: | Triplet-A | 5.7071 eV | 217.25 nm | f=0.0000 | <S**2>=2.000 |
| 166 -> 178        | 0.14720   |           |           |          |              |
| 166 -> 184        | 0.10366   |           |           |          |              |
| 169 -> 178        | 0.45092   |           |           |          |              |
| 169 -> 184        | 0.31129   |           |           |          |              |
| 169 -> 185        | 0.14793   |           |           |          |              |
| 169 -> 188        | -0.14070  |           |           |          |              |
| Excited State 20: | Triplet-A | 5.7734 eV | 214.75 nm | f=0.0000 | <S**2>=2.000 |
| 159 -> 178        | -0.17118  |           |           |          |              |
| 168 -> 178        | 0.18554   |           |           |          |              |
| 168 -> 184        | 0.12298   |           |           |          |              |
| 170 -> 178        | -0.16019  |           |           |          |              |
| 170 -> 184        | -0.11526  |           |           |          |              |
| 171 -> 178        | 0.32803   |           |           |          |              |
| 171 -> 184        | 0.22905   |           |           |          |              |
| 171 -> 185        | 0.10466   |           |           |          |              |
| Excited State 21: | Triplet-A | 5.7747 eV | 214.70 nm | f=0.0000 | <S**2>=2.000 |
| 158 -> 178        | -0.17021  |           |           |          |              |
| 167 -> 178        | -0.17662  |           |           |          |              |
| 167 -> 184        | -0.11743  |           |           |          |              |
| 170 -> 178        | -0.32521  |           |           |          |              |
| 170 -> 184        | -0.22722  |           |           |          |              |
| 170 -> 185        | -0.10358  |           |           |          |              |
| 171 -> 178        | -0.15833  |           |           |          |              |
| 171 -> 184        | -0.11423  |           |           |          |              |
| Excited State 22: | Triplet-A | 5.7982 eV | 213.83 nm | f=0.0000 | <S**2>=2.000 |
| 145 -> 177        | 0.10917   |           |           |          |              |
| 160 -> 179        | -0.11521  |           |           |          |              |
| 161 -> 180        | -0.11801  |           |           |          |              |
| 162 -> 181        | 0.11861   |           |           |          |              |
| 163 -> 185        | 0.10541   |           |           |          |              |
| 164 -> 186        | -0.11184  |           |           |          |              |
| 165 -> 187        | 0.11168   |           |           |          |              |
| 166 -> 172        | -0.14084  |           |           |          |              |
| 166 -> 191        | 0.16164   |           |           |          |              |
| 167 -> 173        | -0.12668  |           |           |          |              |
| 168 -> 174        | -0.13162  |           |           |          |              |
| 168 -> 195        | 0.10287   |           |           |          |              |
| Excited State 23: | Triplet-A | 5.8003 eV | 213.75 nm | f=0.0000 | <S**2>=2.000 |
| 143 -> 175        | -0.10761  |           |           |          |              |
| 143 -> 176        | 0.11619   |           |           |          |              |
| 160 -> 180        | 0.11610   |           |           |          |              |
| 161 -> 179        | 0.10028   |           |           |          |              |
| 163 -> 186        | -0.11080  |           |           |          |              |
| 166 -> 173        | -0.14436  |           |           |          |              |
| 166 -> 186        | -0.10021  |           |           |          |              |
| 166 -> 194        | 0.11757   |           |           |          |              |
| 167 -> 172        | -0.13717  |           |           |          |              |
| 167 -> 191        | 0.14650   |           |           |          |              |
| 171 -> 178        | 0.12745   |           |           |          |              |
| Excited State 24: | Triplet-A | 5.8005 eV | 213.75 nm | f=0.0000 | <S**2>=2.000 |
| 145 -> 177        | -0.13197  |           |           |          |              |
| 160 -> 181        | 0.11444   |           |           |          |              |
| 163 -> 187        | 0.10712   |           |           |          |              |
| 167 -> 174        | 0.11625   |           |           |          |              |
| 168 -> 172        | -0.13990  |           |           |          |              |
| 168 -> 191        | 0.15025   |           |           |          |              |
| 170 -> 178        | -0.13378  |           |           |          |              |
| Excited State 25: | Triplet-A | 6.1489 eV | 201.64 nm | f=0.0000 | <S**2>=2.000 |
| 160 -> 172        | -0.12882  |           |           |          |              |
| 161 -> 173        | 0.15046   |           |           |          |              |
| 162 -> 174        | -0.14190  |           |           |          |              |
| 163 -> 175        | -0.16042  |           |           |          |              |
| 164 -> 176        | 0.15746   |           |           |          |              |
| 165 -> 177        | 0.14810   |           |           |          |              |
| 166 -> 172        | -0.13208  |           |           |          |              |
| 167 -> 180        | 0.12367   |           |           |          |              |

|                   |           |           |           |          |              |  |
|-------------------|-----------|-----------|-----------|----------|--------------|--|
| 168 -> 181        | 0.12142   |           |           |          |              |  |
| Excited State 26: | Triplet-A | 6.1499 eV | 201.60 nm | f=0.0000 | <S**2>=2.000 |  |
| 160 -> 173        | 0.11859   |           |           |          |              |  |
| 161 -> 172        | -0.14340  |           |           |          |              |  |
| 163 -> 176        | -0.14940  |           |           |          |              |  |
| 164 -> 175        | 0.16906   |           |           |          |              |  |
| 165 -> 176        | -0.10173  |           |           |          |              |  |
| 166 -> 173        | 0.12303   |           |           |          |              |  |
| 166 -> 180        | -0.12863  |           |           |          |              |  |
| Excited State 27: | Triplet-A | 6.1500 eV | 201.60 nm | f=0.0000 | <S**2>=2.000 |  |
| 160 -> 174        | -0.11731  |           |           |          |              |  |
| 162 -> 172        | -0.14212  |           |           |          |              |  |
| 163 -> 177        | 0.14499   |           |           |          |              |  |
| 165 -> 175        | -0.13660  |           |           |          |              |  |
| 165 -> 177        | -0.12285  |           |           |          |              |  |
| 168 -> 172        | -0.10139  |           |           |          |              |  |
| Excited State 28: | Triplet-A | 6.2082 eV | 199.71 nm | f=0.0000 | <S**2>=2.000 |  |
| 137 -> 172        | -0.10017  |           |           |          |              |  |
| 158 -> 174        | 0.21301   |           |           |          |              |  |
| 159 -> 173        | 0.22074   |           |           |          |              |  |
| 167 -> 174        | 0.13911   |           |           |          |              |  |
| 168 -> 173        | -0.15262  |           |           |          |              |  |
| 169 -> 172        | 0.12886   |           |           |          |              |  |
| 170 -> 173        | 0.14184   |           |           |          |              |  |
| 170 -> 174        | 0.21476   |           |           |          |              |  |
| 171 -> 173        | -0.22566  |           |           |          |              |  |
| 171 -> 174        | 0.13721   |           |           |          |              |  |
| Excited State 29: | Triplet-A | 6.2268 eV | 199.11 nm | f=0.0000 | <S**2>=2.000 |  |
| 137 -> 173        | 0.13414   |           |           |          |              |  |
| 158 -> 174        | 0.13265   |           |           |          |              |  |
| 159 -> 172        | -0.14628  |           |           |          |              |  |
| 159 -> 173        | -0.12671  |           |           |          |              |  |
| 159 -> 175        | -0.10748  |           |           |          |              |  |
| 168 -> 172        | 0.12369   |           |           |          |              |  |
| 168 -> 174        | 0.10507   |           |           |          |              |  |
| 169 -> 173        | -0.19159  |           |           |          |              |  |
| 170 -> 173        | -0.18106  |           |           |          |              |  |
| 171 -> 172        | 0.17652   |           |           |          |              |  |
| 171 -> 174        | 0.18572   |           |           |          |              |  |
| 171 -> 175        | 0.11184   |           |           |          |              |  |
| Excited State 30: | Triplet-A | 6.2271 eV | 199.10 nm | f=0.0000 | <S**2>=2.000 |  |
| 158 -> 172        | -0.14408  |           |           |          |              |  |
| 158 -> 173        | 0.12971   |           |           |          |              |  |
| 159 -> 174        | 0.13132   |           |           |          |              |  |
| 167 -> 172        | -0.11798  |           |           |          |              |  |
| 167 -> 174        | 0.12374   |           |           |          |              |  |
| 168 -> 173        | 0.10665   |           |           |          |              |  |
| 169 -> 174        | -0.19070  |           |           |          |              |  |
| 170 -> 172        | -0.17401  |           |           |          |              |  |
| 170 -> 174        | 0.19156   |           |           |          |              |  |
| 171 -> 173        | 0.17926   |           |           |          |              |  |

**Table S9.** First TD- $\omega$ B97X/def2-TZVP  $S_0 \rightarrow S_n$  and  $T_0 \rightarrow T_n$  transitions computed for the optimized geometry of  $\text{Cu}(\text{TT})_3\text{Cl}$ .

Singlets:

|                  |           |           |           |          |              |  |
|------------------|-----------|-----------|-----------|----------|--------------|--|
| Excited State 1: | Singlet-A | 5.1537 eV | 240.57 nm | f=0.0008 | <S**2>=0.000 |  |
| 175 -> 180       | -0.38006  |           |           |          |              |  |
| 176 -> 179       | 0.46147   |           |           |          |              |  |
| 176 -> 182       | -0.11715  |           |           |          |              |  |
| Excited State 2: | Singlet-A | 5.1726 eV | 239.70 nm | f=0.0093 | <S**2>=0.000 |  |
| 175 -> 179       | -0.29541  |           |           |          |              |  |
| 175 -> 180       | -0.13104  |           |           |          |              |  |
| 176 -> 177       | -0.28790  |           |           |          |              |  |
| 176 -> 178       | -0.23596  |           |           |          |              |  |
| 176 -> 180       | 0.30377   |           |           |          |              |  |
| 176 -> 181       | 0.22257   |           |           |          |              |  |
| Excited State 3: | Singlet-A | 5.1747 eV | 239.59 nm | f=0.0094 | <S**2>=0.000 |  |
| 175 -> 177       | 0.28447   |           |           |          |              |  |

|                   |           |           |           |          |              |  |
|-------------------|-----------|-----------|-----------|----------|--------------|--|
| 175 -> 178        | 0.23214   |           |           |          |              |  |
| 175 -> 179        | -0.12504  |           |           |          |              |  |
| 175 -> 180        | 0.34666   |           |           |          |              |  |
| 175 -> 181        | -0.21957  |           |           |          |              |  |
| 176 -> 179        | 0.25442   |           |           |          |              |  |
| 176 -> 180        | 0.10397   |           |           |          |              |  |
| Excited State 4:  | Singlet-A | 5.3251 eV | 232.83 nm | f=0.1155 | <S**2>=0.000 |  |
| 174 -> 179        | 0.44458   |           |           |          |              |  |
| 174 -> 182        | -0.13309  |           |           |          |              |  |
| 175 -> 177        | -0.18090  |           |           |          |              |  |
| 175 -> 178        | -0.15253  |           |           |          |              |  |
| 175 -> 180        | 0.17441   |           |           |          |              |  |
| 175 -> 181        | 0.14190   |           |           |          |              |  |
| 176 -> 179        | 0.16858   |           |           |          |              |  |
| Excited State 5:  | Singlet-A | 5.3271 eV | 232.74 nm | f=0.1080 | <S**2>=0.000 |  |
| 172 -> 181        | -0.10216  |           |           |          |              |  |
| 174 -> 180        | 0.32826   |           |           |          |              |  |
| 174 -> 183        | -0.10108  |           |           |          |              |  |
| 175 -> 179        | 0.22281   |           |           |          |              |  |
| 176 -> 177        | -0.22723  |           |           |          |              |  |
| 176 -> 178        | -0.18911  |           |           |          |              |  |
| 176 -> 180        | -0.20238  |           |           |          |              |  |
| 176 -> 181        | 0.17634   |           |           |          |              |  |
| Excited State 6:  | Singlet-A | 5.3319 eV | 232.53 nm | f=0.0043 | <S**2>=0.000 |  |
| 174 -> 179        | 0.41671   |           |           |          |              |  |
| 174 -> 182        | -0.11021  |           |           |          |              |  |
| 175 -> 177        | 0.21915   |           |           |          |              |  |
| 175 -> 178        | 0.17625   |           |           |          |              |  |
| 175 -> 179        | 0.11266   |           |           |          |              |  |
| 175 -> 180        | -0.18543  |           |           |          |              |  |
| 175 -> 181        | -0.16452  |           |           |          |              |  |
| 176 -> 179        | -0.18603  |           |           |          |              |  |
| Excited State 7:  | Singlet-A | 5.3350 eV | 232.40 nm | f=0.0122 | <S**2>=0.000 |  |
| 174 -> 180        | 0.51358   |           |           |          |              |  |
| 174 -> 183        | -0.14001  |           |           |          |              |  |
| 174 -> 203        | -0.10858  |           |           |          |              |  |
| 175 -> 179        | -0.16693  |           |           |          |              |  |
| 176 -> 177        | 0.16677   |           |           |          |              |  |
| 176 -> 178        | 0.13187   |           |           |          |              |  |
| 176 -> 180        | 0.10962   |           |           |          |              |  |
| 176 -> 181        | -0.12289  |           |           |          |              |  |
| Excited State 8:  | Singlet-A | 5.3450 eV | 231.96 nm | f=0.0009 | <S**2>=0.000 |  |
| 167 -> 179        | 0.12773   |           |           |          |              |  |
| 168 -> 180        | 0.13770   |           |           |          |              |  |
| 170 -> 183        | -0.10652  |           |           |          |              |  |
| 171 -> 181        | 0.15645   |           |           |          |              |  |
| 174 -> 177        | 0.19060   |           |           |          |              |  |
| 174 -> 178        | 0.15793   |           |           |          |              |  |
| 175 -> 179        | 0.30209   |           |           |          |              |  |
| 176 -> 180        | 0.34523   |           |           |          |              |  |
| 176 -> 183        | -0.11117  |           |           |          |              |  |
| Excited State 9:  | Singlet-A | 5.3832 eV | 230.32 nm | f=0.0005 | <S**2>=0.000 |  |
| 166 -> 179        | -0.17299  |           |           |          |              |  |
| 166 -> 180        | -0.15159  |           |           |          |              |  |
| 167 -> 177        | 0.13604   |           |           |          |              |  |
| 167 -> 178        | 0.12809   |           |           |          |              |  |
| 167 -> 180        | -0.16579  |           |           |          |              |  |
| 168 -> 177        | 0.11923   |           |           |          |              |  |
| 168 -> 178        | 0.11262   |           |           |          |              |  |
| 168 -> 179        | -0.16472  |           |           |          |              |  |
| 169 -> 181        | -0.19384  |           |           |          |              |  |
| 169 -> 183        | 0.14761   |           |           |          |              |  |
| 170 -> 182        | 0.14964   |           |           |          |              |  |
| 171 -> 182        | 0.12621   |           |           |          |              |  |
| 171 -> 183        | 0.21167   |           |           |          |              |  |
| 173 -> 181        | -0.11184  |           |           |          |              |  |
| 175 -> 177        | -0.11189  |           |           |          |              |  |
| 175 -> 180        | 0.11382   |           |           |          |              |  |
| 176 -> 179        | 0.11007   |           |           |          |              |  |
| Excited State 10: | Singlet-A | 5.3834 eV | 230.31 nm | f=0.0005 | <S**2>=0.000 |  |
| 166 -> 179        | 0.15185   |           |           |          |              |  |

|                   |           |           |           |          |              |  |
|-------------------|-----------|-----------|-----------|----------|--------------|--|
| 166 -> 180        | -0.17023  |           |           |          |              |  |
| 167 -> 177        | -0.11811  |           |           |          |              |  |
| 167 -> 178        | -0.11197  |           |           |          |              |  |
| 167 -> 179        | -0.17063  |           |           |          |              |  |
| 168 -> 177        | 0.13540   |           |           |          |              |  |
| 168 -> 178        | 0.12702   |           |           |          |              |  |
| 168 -> 180        | 0.16309   |           |           |          |              |  |
| 169 -> 182        | 0.15121   |           |           |          |              |  |
| 170 -> 181        | -0.19212  |           |           |          |              |  |
| 170 -> 183        | -0.14477  |           |           |          |              |  |
| 171 -> 182        | -0.21090  |           |           |          |              |  |
| 171 -> 183        | 0.12864   |           |           |          |              |  |
| 172 -> 181        | 0.11046   |           |           |          |              |  |
| 175 -> 179        | 0.11530   |           |           |          |              |  |
| 176 -> 177        | -0.11177  |           |           |          |              |  |
| 176 -> 180        | -0.11266  |           |           |          |              |  |
|                   |           |           |           |          |              |  |
| Excited State 11: | Singlet-A | 5.3966 eV | 229.75 nm | f=0.0006 | <S**2>=0.000 |  |
| 166 -> 177        | 0.15599   |           |           |          |              |  |
| 166 -> 178        | 0.14544   |           |           |          |              |  |
| 167 -> 179        | -0.21081  |           |           |          |              |  |
| 168 -> 180        | -0.21596  |           |           |          |              |  |
| 169 -> 182        | 0.14687   |           |           |          |              |  |
| 170 -> 183        | 0.15128   |           |           |          |              |  |
| 171 -> 181        | -0.21271  |           |           |          |              |  |
| 172 -> 183        | -0.11370  |           |           |          |              |  |
| 173 -> 182        | 0.11102   |           |           |          |              |  |
| 175 -> 179        | 0.23692   |           |           |          |              |  |
| 176 -> 180        | 0.24556   |           |           |          |              |  |
|                   |           |           |           |          |              |  |
| Excited State 12: | Singlet-A | 5.4542 eV | 227.32 nm | f=0.0012 | <S**2>=0.000 |  |
| 174 -> 177        | 0.38086   |           |           |          |              |  |
| 174 -> 178        | 0.32738   |           |           |          |              |  |
| 174 -> 181        | -0.31774  |           |           |          |              |  |
| 175 -> 179        | -0.15992  |           |           |          |              |  |
| 176 -> 180        | -0.16048  |           |           |          |              |  |
|                   |           |           |           |          |              |  |
| Excited State 13: | Singlet-A | 5.6692 eV | 218.70 nm | f=0.1962 | <S**2>=0.000 |  |
| 171 -> 179        | -0.15779  |           |           |          |              |  |
| 172 -> 179        | 0.21308   |           |           |          |              |  |
| 173 -> 177        | 0.20224   |           |           |          |              |  |
| 173 -> 178        | 0.16818   |           |           |          |              |  |
| 173 -> 180        | -0.21051  |           |           |          |              |  |
| 176 -> 177        | 0.17265   |           |           |          |              |  |
| 176 -> 181        | 0.18495   |           |           |          |              |  |
| 176 -> 195        | -0.15299  |           |           |          |              |  |
| 176 -> 204        | 0.11062   |           |           |          |              |  |
| 176 -> 208        | -0.14213  |           |           |          |              |  |
|                   |           |           |           |          |              |  |
| Excited State 14: | Singlet-A | 5.6711 eV | 218.63 nm | f=0.1942 | <S**2>=0.000 |  |
| 171 -> 180        | 0.15846   |           |           |          |              |  |
| 172 -> 177        | 0.20017   |           |           |          |              |  |
| 172 -> 178        | 0.16558   |           |           |          |              |  |
| 172 -> 180        | 0.20429   |           |           |          |              |  |
| 173 -> 179        | 0.22156   |           |           |          |              |  |
| 175 -> 177        | 0.17100   |           |           |          |              |  |
| 175 -> 181        | 0.18535   |           |           |          |              |  |
| 175 -> 195        | -0.15291  |           |           |          |              |  |
| 175 -> 204        | 0.11036   |           |           |          |              |  |
| 175 -> 208        | -0.14155  |           |           |          |              |  |
|                   |           |           |           |          |              |  |
| Excited State 15: | Singlet-A | 5.6920 eV | 217.82 nm | f=0.0591 | <S**2>=0.000 |  |
| 171 -> 179        | 0.14100   |           |           |          |              |  |
| 172 -> 179        | -0.17274  |           |           |          |              |  |
| 173 -> 177        | -0.18054  |           |           |          |              |  |
| 173 -> 178        | -0.15275  |           |           |          |              |  |
| 173 -> 180        | 0.17082   |           |           |          |              |  |
| 173 -> 181        | 0.10020   |           |           |          |              |  |
| 176 -> 177        | 0.24150   |           |           |          |              |  |
| 176 -> 181        | 0.23479   |           |           |          |              |  |
| 176 -> 195        | -0.18629  |           |           |          |              |  |
| 176 -> 204        | 0.12240   |           |           |          |              |  |
| 176 -> 208        | -0.14567  |           |           |          |              |  |
|                   |           |           |           |          |              |  |
| Excited State 16: | Singlet-A | 5.6941 eV | 217.74 nm | f=0.0563 | <S**2>=0.000 |  |
| 171 -> 180        | -0.14479  |           |           |          |              |  |
| 172 -> 177        | -0.18154  |           |           |          |              |  |
| 172 -> 178        | -0.15310  |           |           |          |              |  |

172 -> 180 -0.16642  
 172 -> 181 0.10055  
 173 -> 179 -0.17533  
 175 -> 177 0.24111  
 175 -> 181 0.23684  
 175 -> 195 -0.18710  
 175 -> 204 0.12267  
 175 -> 208 -0.14555

Excited State 17: Singlet-A 5.7430 eV 215.89 nm f=0.0310 <S\*\*2>=0.000  
 169 -> 179 -0.13796  
 170 -> 180 -0.14398  
 171 -> 177 0.20467  
 171 -> 178 0.18463  
 172 -> 180 0.36159  
 173 -> 179 -0.35344  
 174 -> 181 0.10208

Excited State 18: Singlet-A 5.8074 eV 213.49 nm f=0.0113 <S\*\*2>=0.000  
 172 -> 180 -0.10504  
 173 -> 179 0.10974  
 174 -> 177 0.31793  
 174 -> 181 0.32512  
 174 -> 187 0.10171  
 174 -> 195 -0.24526  
 174 -> 198 0.11368  
 174 -> 204 0.14525  
 174 -> 208 -0.16049  
 174 -> 238 -0.10576

Excited State 19: Singlet-A 5.8268 eV 212.78 nm f=0.0020 <S\*\*2>=0.000  
 169 -> 180 -0.11785  
 170 -> 179 0.13346  
 172 -> 179 0.40912  
 172 -> 182 -0.11307  
 173 -> 180 0.37954  
 173 -> 183 -0.10392

Excited State 20: Singlet-A 5.8451 eV 212.12 nm f=0.0233 <S\*\*2>=0.000  
 169 -> 179 -0.10639  
 170 -> 180 0.10223  
 172 -> 177 -0.19252  
 172 -> 178 -0.17106  
 172 -> 180 0.20762  
 173 -> 179 0.20595  
 176 -> 178 0.23048  
 176 -> 181 0.23273  
 176 -> 198 0.21593  
 176 -> 208 0.12650

Triplets:

Excited State 1: Triplet-A 3.8338 eV 323.40 nm f=0.0000 <S\*\*2>=2.000  
 166 -> 179 0.10838  
 167 -> 179 -0.13610  
 167 -> 182 -0.11513  
 169 -> 179 -0.15740  
 169 -> 181 0.18139  
 169 -> 182 0.21423  
 170 -> 179 0.11316  
 170 -> 181 -0.11726  
 170 -> 182 -0.12859  
 171 -> 179 0.15501  
 171 -> 181 -0.16882  
 171 -> 182 -0.20057  
 173 -> 179 -0.10765  
 173 -> 181 0.10197  
 173 -> 182 0.11250

Excited State 2: Triplet-A 3.8342 eV 323.37 nm f=0.0000 <S\*\*2>=2.000  
 169 -> 179 0.12456  
 169 -> 180 0.12559  
 169 -> 181 0.18740  
 169 -> 182 -0.10840  
 169 -> 183 -0.18631  
 170 -> 181 0.13219  
 171 -> 179 0.10197  
 171 -> 180 0.13732

|                  |           |           |           |          |              |
|------------------|-----------|-----------|-----------|----------|--------------|
| 171 -> 181       | 0.14226   |           |           |          |              |
| 171 -> 183       | -0.19847  |           |           |          |              |
| Excited State 3: | Triplet-A | 3.8343 eV | 323.36 nm | f=0.0000 | <S**2>=2.000 |
| 168 -> 180       | -0.15992  |           |           |          |              |
| 168 -> 183       | -0.10924  |           |           |          |              |
| 170 -> 180       | -0.19567  |           |           |          |              |
| 170 -> 181       | 0.19035   |           |           |          |              |
| 170 -> 182       | -0.11683  |           |           |          |              |
| 170 -> 183       | 0.22965   |           |           |          |              |
| 171 -> 180       | 0.13501   |           |           |          |              |
| 171 -> 181       | -0.19869  |           |           |          |              |
| 171 -> 182       | 0.11548   |           |           |          |              |
| 171 -> 183       | -0.14753  |           |           |          |              |
| 172 -> 180       | 0.12366   |           |           |          |              |
| 172 -> 181       | -0.10065  |           |           |          |              |
| 172 -> 183       | -0.11806  |           |           |          |              |
| Excited State 4: | Triplet-A | 4.0849 eV | 303.52 nm | f=0.0000 | <S**2>=2.000 |
| 162 -> 181       | -0.12312  |           |           |          |              |
| 163 -> 183       | -0.11928  |           |           |          |              |
| 166 -> 180       | -0.17623  |           |           |          |              |
| 166 -> 183       | -0.20199  |           |           |          |              |
| 167 -> 183       | -0.11789  |           |           |          |              |
| 168 -> 177       | 0.18722   |           |           |          |              |
| 168 -> 178       | 0.19448   |           |           |          |              |
| 168 -> 180       | 0.10595   |           |           |          |              |
| 168 -> 181       | 0.10081   |           |           |          |              |
| 168 -> 182       | -0.12091  |           |           |          |              |
| 170 -> 181       | 0.10977   |           |           |          |              |
| 171 -> 180       | 0.10901   |           |           |          |              |
| Excited State 5: | Triplet-A | 4.0850 eV | 303.51 nm | f=0.0000 | <S**2>=2.000 |
| 161 -> 181       | 0.12381   |           |           |          |              |
| 163 -> 182       | 0.11796   |           |           |          |              |
| 166 -> 179       | 0.17860   |           |           |          |              |
| 166 -> 182       | 0.20317   |           |           |          |              |
| 167 -> 177       | -0.18737  |           |           |          |              |
| 167 -> 178       | -0.19500  |           |           |          |              |
| 167 -> 180       | 0.10019   |           |           |          |              |
| 167 -> 181       | -0.10266  |           |           |          |              |
| 167 -> 182       | -0.11446  |           |           |          |              |
| 168 -> 179       | 0.10043   |           |           |          |              |
| 168 -> 183       | 0.12252   |           |           |          |              |
| 169 -> 181       | -0.11036  |           |           |          |              |
| 171 -> 179       | -0.10748  |           |           |          |              |
| Excited State 6: | Triplet-A | 4.0874 eV | 303.34 nm | f=0.0000 | <S**2>=2.000 |
| 161 -> 182       | -0.11546  |           |           |          |              |
| 162 -> 183       | -0.11207  |           |           |          |              |
| 163 -> 181       | -0.14039  |           |           |          |              |
| 166 -> 177       | -0.17833  |           |           |          |              |
| 166 -> 178       | -0.18743  |           |           |          |              |
| 166 -> 181       | -0.11744  |           |           |          |              |
| 167 -> 179       | 0.19247   |           |           |          |              |
| 167 -> 182       | 0.19837   |           |           |          |              |
| 168 -> 180       | 0.18504   |           |           |          |              |
| 168 -> 183       | 0.19153   |           |           |          |              |
| 169 -> 179       | -0.10116  |           |           |          |              |
| 171 -> 181       | -0.10999  |           |           |          |              |
| Excited State 7: | Triplet-A | 4.1713 eV | 297.23 nm | f=0.0000 | <S**2>=2.000 |
| 161 -> 179       | 0.10932   |           |           |          |              |
| 162 -> 177       | -0.14423  |           |           |          |              |
| 162 -> 178       | -0.14585  |           |           |          |              |
| 162 -> 180       | -0.11194  |           |           |          |              |
| 163 -> 180       | -0.20141  |           |           |          |              |
| 166 -> 180       | 0.11033   |           |           |          |              |
| 166 -> 183       | -0.11257  |           |           |          |              |
| 168 -> 181       | 0.15421   |           |           |          |              |
| Excited State 8: | Triplet-A | 4.1714 eV | 297.22 nm | f=0.0000 | <S**2>=2.000 |
| 161 -> 177       | -0.14426  |           |           |          |              |
| 161 -> 178       | -0.14632  |           |           |          |              |
| 161 -> 180       | 0.11121   |           |           |          |              |
| 162 -> 179       | 0.11364   |           |           |          |              |
| 163 -> 179       | -0.19816  |           |           |          |              |
| 166 -> 179       | 0.11104   |           |           |          |              |



|                   |           |           |           |          |              |  |
|-------------------|-----------|-----------|-----------|----------|--------------|--|
| 166 -> 182        | -0.11439  |           |           |          |              |  |
| 167 -> 181        | 0.15544   |           |           |          |              |  |
| 167 -> 198        | -0.10031  |           |           |          |              |  |
| Excited State 9:  | Triplet-A | 4.1741 eV | 297.03 nm | f=0.0000 | <S**2>=2.000 |  |
| 161 -> 179        | 0.18098   |           |           |          |              |  |
| 161 -> 182        | 0.10334   |           |           |          |              |  |
| 162 -> 180        | 0.18043   |           |           |          |              |  |
| 162 -> 183        | 0.10357   |           |           |          |              |  |
| 163 -> 177        | 0.17428   |           |           |          |              |  |
| 163 -> 178        | 0.17371   |           |           |          |              |  |
| 166 -> 181        | 0.15592   |           |           |          |              |  |
| 167 -> 179        | 0.13329   |           |           |          |              |  |
| 167 -> 182        | -0.12115  |           |           |          |              |  |
| 168 -> 180        | 0.13322   |           |           |          |              |  |
| 168 -> 183        | -0.12091  |           |           |          |              |  |
| 172 -> 180        | -0.11668  |           |           |          |              |  |
| 173 -> 179        | 0.11804   |           |           |          |              |  |
| Excited State 10: | Triplet-A | 4.9756 eV | 249.18 nm | f=0.0000 | <S**2>=2.000 |  |
| 161 -> 182        | 0.12052   |           |           |          |              |  |
| 162 -> 183        | 0.10743   |           |           |          |              |  |
| 163 -> 181        | 0.16008   |           |           |          |              |  |
| 166 -> 198        | -0.11432  |           |           |          |              |  |
| 167 -> 202        | -0.11357  |           |           |          |              |  |
| 168 -> 203        | 0.10097   |           |           |          |              |  |
| 173 -> 179        | -0.10589  |           |           |          |              |  |
| 175 -> 180        | -0.22611  |           |           |          |              |  |
| 176 -> 179        | 0.25940   |           |           |          |              |  |
| Excited State 11: | Triplet-A | 4.9886 eV | 248.54 nm | f=0.0000 | <S**2>=2.000 |  |
| 161 -> 181        | -0.13272  |           |           |          |              |  |
| 163 -> 182        | -0.13514  |           |           |          |              |  |
| 167 -> 181        | -0.13612  |           |           |          |              |  |
| 167 -> 198        | -0.12520  |           |           |          |              |  |
| 174 -> 179        | -0.13684  |           |           |          |              |  |
| 175 -> 179        | -0.11489  |           |           |          |              |  |
| 175 -> 180        | -0.13793  |           |           |          |              |  |
| 176 -> 177        | -0.11429  |           |           |          |              |  |
| 176 -> 179        | -0.11250  |           |           |          |              |  |
| 176 -> 180        | 0.10540   |           |           |          |              |  |
| 176 -> 181        | 0.12924   |           |           |          |              |  |
| Excited State 12: | Triplet-A | 4.9896 eV | 248.48 nm | f=0.0000 | <S**2>=2.000 |  |
| 162 -> 181        | -0.13165  |           |           |          |              |  |
| 163 -> 183        | -0.13637  |           |           |          |              |  |
| 168 -> 181        | -0.13684  |           |           |          |              |  |
| 168 -> 198        | -0.12503  |           |           |          |              |  |
| 174 -> 180        | -0.13615  |           |           |          |              |  |
| 175 -> 177        | 0.11374   |           |           |          |              |  |
| 175 -> 179        | -0.12343  |           |           |          |              |  |
| 175 -> 180        | 0.11972   |           |           |          |              |  |
| 175 -> 181        | -0.12844  |           |           |          |              |  |
| 176 -> 180        | 0.12946   |           |           |          |              |  |
| Excited State 13: | Triplet-A | 5.0049 eV | 247.73 nm | f=0.0000 | <S**2>=2.000 |  |
| 166 -> 181        | 0.17166   |           |           |          |              |  |
| 167 -> 179        | 0.18545   |           |           |          |              |  |
| 167 -> 182        | -0.10558  |           |           |          |              |  |
| 168 -> 180        | 0.17756   |           |           |          |              |  |
| 168 -> 183        | -0.10326  |           |           |          |              |  |
| 169 -> 179        | -0.13510  |           |           |          |              |  |
| 169 -> 182        | -0.12103  |           |           |          |              |  |
| 170 -> 180        | -0.12774  |           |           |          |              |  |
| 170 -> 183        | -0.11333  |           |           |          |              |  |
| 171 -> 177        | 0.15426   |           |           |          |              |  |
| 171 -> 178        | 0.15824   |           |           |          |              |  |
| 172 -> 180        | 0.12016   |           |           |          |              |  |
| 173 -> 179        | -0.12879  |           |           |          |              |  |
| 174 -> 177        | 0.11316   |           |           |          |              |  |
| Excited State 14: | Triplet-A | 5.0068 eV | 247.63 nm | f=0.0000 | <S**2>=2.000 |  |
| 166 -> 179        | -0.15945  |           |           |          |              |  |
| 167 -> 180        | -0.11510  |           |           |          |              |  |
| 167 -> 181        | -0.15537  |           |           |          |              |  |
| 168 -> 179        | -0.11388  |           |           |          |              |  |
| 169 -> 177        | -0.12031  |           |           |          |              |  |
| 169 -> 178        | -0.12598  |           |           |          |              |  |

|                   |           |           |           |          |              |
|-------------------|-----------|-----------|-----------|----------|--------------|
| 171 -> 179        | 0.17118   |           |           |          |              |
| 171 -> 182        | 0.13064   |           |           |          |              |
| 173 -> 177        | -0.11700  |           |           |          |              |
| 173 -> 178        | -0.11248  |           |           |          |              |
| 174 -> 179        | 0.14063   |           |           |          |              |
| Excited State 15: | Triplet-A | 5.0070 eV | 247.62 nm | f=0.0000 | <S**2>=2.000 |
| 166 -> 180        | -0.15690  |           |           |          |              |
| 167 -> 179        | -0.10743  |           |           |          |              |
| 168 -> 180        | 0.12381   |           |           |          |              |
| 168 -> 181        | -0.15390  |           |           |          |              |
| 170 -> 177        | -0.12006  |           |           |          |              |
| 170 -> 178        | -0.12542  |           |           |          |              |
| 170 -> 180        | -0.10106  |           |           |          |              |
| 171 -> 180        | 0.17305   |           |           |          |              |
| 171 -> 183        | 0.13224   |           |           |          |              |
| 172 -> 177        | 0.11669   |           |           |          |              |
| 172 -> 178        | 0.11194   |           |           |          |              |
| 174 -> 180        | 0.13977   |           |           |          |              |
| Excited State 16: | Triplet-A | 5.0621 eV | 244.92 nm | f=0.0000 | <S**2>=2.000 |
| 166 -> 179        | -0.10598  |           |           |          |              |
| 175 -> 179        | 0.19411   |           |           |          |              |
| 176 -> 177        | 0.19652   |           |           |          |              |
| 176 -> 178        | 0.16687   |           |           |          |              |
| 176 -> 179        | 0.25642   |           |           |          |              |
| 176 -> 180        | -0.16132  |           |           |          |              |
| 176 -> 181        | -0.15286  |           |           |          |              |
| Excited State 17: | Triplet-A | 5.0630 eV | 244.89 nm | f=0.0000 | <S**2>=2.000 |
| 166 -> 180        | 0.10053   |           |           |          |              |
| 175 -> 177        | 0.18032   |           |           |          |              |
| 175 -> 178        | 0.15249   |           |           |          |              |
| 175 -> 179        | -0.15224  |           |           |          |              |
| 175 -> 181        | -0.13821  |           |           |          |              |
| 176 -> 179        | 0.27328   |           |           |          |              |
| 176 -> 180        | 0.19242   |           |           |          |              |
| Excited State 18: | Triplet-A | 5.0661 eV | 244.73 nm | f=0.0000 | <S**2>=2.000 |
| 162 -> 183        | 0.10554   |           |           |          |              |
| 168 -> 180        | -0.13691  |           |           |          |              |
| 175 -> 177        | 0.10007   |           |           |          |              |
| 175 -> 180        | 0.39490   |           |           |          |              |
| 176 -> 179        | -0.15200  |           |           |          |              |
| Excited State 19: | Triplet-A | 5.1078 eV | 242.73 nm | f=0.0000 | <S**2>=2.000 |
| 161 -> 179        | -0.12015  |           |           |          |              |
| 162 -> 180        | -0.10248  |           |           |          |              |
| 167 -> 179        | 0.10192   |           |           |          |              |
| 169 -> 179        | 0.12106   |           |           |          |              |
| 169 -> 182        | 0.10613   |           |           |          |              |
| 170 -> 180        | 0.10314   |           |           |          |              |
| 174 -> 177        | 0.17198   |           |           |          |              |
| 174 -> 178        | 0.14144   |           |           |          |              |
| 174 -> 181        | -0.13841  |           |           |          |              |
| 175 -> 180        | 0.11838   |           |           |          |              |
| 176 -> 179        | -0.13900  |           |           |          |              |
| Excited State 20: | Triplet-A | 5.1127 eV | 242.50 nm | f=0.0000 | <S**2>=2.000 |
| 163 -> 179        | -0.11904  |           |           |          |              |
| 171 -> 182        | -0.11542  |           |           |          |              |
| 174 -> 179        | 0.26568   |           |           |          |              |
| 175 -> 179        | -0.11052  |           |           |          |              |
| 176 -> 180        | 0.12225   |           |           |          |              |
| Excited State 21: | Triplet-A | 5.1137 eV | 242.46 nm | f=0.0000 | <S**2>=2.000 |
| 163 -> 180        | -0.12102  |           |           |          |              |
| 171 -> 183        | -0.11532  |           |           |          |              |
| 174 -> 180        | 0.26210   |           |           |          |              |
| 175 -> 180        | 0.14419   |           |           |          |              |
| 176 -> 179        | 0.10406   |           |           |          |              |
| Excited State 22: | Triplet-A | 5.2914 eV | 234.31 nm | f=0.0000 | <S**2>=2.000 |
| 174 -> 177        | -0.14176  |           |           |          |              |
| 174 -> 178        | -0.12571  |           |           |          |              |
| 174 -> 181        | 0.12137   |           |           |          |              |
| 175 -> 179        | -0.41740  |           |           |          |              |
| 175 -> 182        | 0.12515   |           |           |          |              |

|                   |           |           |           |          |              |  |
|-------------------|-----------|-----------|-----------|----------|--------------|--|
| 176 -> 180        | -0.37789  |           |           |          |              |  |
| 176 -> 183        | 0.11230   |           |           |          |              |  |
| Excited State 23: | Triplet-A | 5.3096 eV | 233.51 nm | f=0.0000 | <S**2>=2.000 |  |
| 174 -> 179        | 0.26011   |           |           |          |              |  |
| 175 -> 177        | 0.29429   |           |           |          |              |  |
| 175 -> 178        | 0.24666   |           |           |          |              |  |
| 175 -> 179        | 0.11828   |           |           |          |              |  |
| 175 -> 180        | -0.21106  |           |           |          |              |  |
| 175 -> 181        | -0.21682  |           |           |          |              |  |
| 176 -> 179        | -0.20810  |           |           |          |              |  |
| 176 -> 180        | -0.14272  |           |           |          |              |  |
| Excited State 24: | Triplet-A | 5.3110 eV | 233.45 nm | f=0.0000 | <S**2>=2.000 |  |
| 174 -> 180        | -0.25623  |           |           |          |              |  |
| 175 -> 179        | 0.18469   |           |           |          |              |  |
| 175 -> 180        | 0.12731   |           |           |          |              |  |
| 176 -> 177        | -0.29479  |           |           |          |              |  |
| 176 -> 178        | -0.24650  |           |           |          |              |  |
| 176 -> 179        | 0.12881   |           |           |          |              |  |
| 176 -> 180        | -0.24254  |           |           |          |              |  |
| 176 -> 181        | 0.21596   |           |           |          |              |  |
| Excited State 25: | Triplet-A | 5.3881 eV | 230.11 nm | f=0.0000 | <S**2>=2.000 |  |
| 163 -> 179        | 0.13047   |           |           |          |              |  |
| 174 -> 179        | 0.41537   |           |           |          |              |  |
| 174 -> 182        | -0.12735  |           |           |          |              |  |
| 174 -> 202        | 0.10376   |           |           |          |              |  |
| 175 -> 177        | -0.14157  |           |           |          |              |  |
| 175 -> 178        | -0.10588  |           |           |          |              |  |
| 175 -> 180        | 0.11926   |           |           |          |              |  |
| 176 -> 179        | 0.11134   |           |           |          |              |  |
| Excited State 26: | Triplet-A | 5.3906 eV | 230.00 nm | f=0.0000 | <S**2>=2.000 |  |
| 163 -> 180        | -0.13034  |           |           |          |              |  |
| 174 -> 180        | -0.41745  |           |           |          |              |  |
| 174 -> 183        | 0.12728   |           |           |          |              |  |
| 174 -> 203        | 0.10382   |           |           |          |              |  |
| 175 -> 179        | -0.12251  |           |           |          |              |  |
| 176 -> 177        | 0.13418   |           |           |          |              |  |
| 176 -> 178        | 0.10001   |           |           |          |              |  |
| 176 -> 180        | 0.10214   |           |           |          |              |  |
| Excited State 27: | Triplet-A | 5.3996 eV | 229.62 nm | f=0.0000 | <S**2>=2.000 |  |
| 162 -> 180        | 0.10200   |           |           |          |              |  |
| 172 -> 180        | -0.10684  |           |           |          |              |  |
| 174 -> 177        | 0.33292   |           |           |          |              |  |
| 174 -> 178        | 0.26130   |           |           |          |              |  |
| 174 -> 181        | -0.23967  |           |           |          |              |  |
| 176 -> 180        | -0.10613  |           |           |          |              |  |
| Excited State 28: | Triplet-A | 5.5252 eV | 224.40 nm | f=0.0000 | <S**2>=2.000 |  |
| 176 -> 177        | 0.24008   |           |           |          |              |  |
| 176 -> 181        | 0.17524   |           |           |          |              |  |
| 176 -> 187        | 0.12664   |           |           |          |              |  |
| 176 -> 195        | -0.18905  |           |           |          |              |  |
| 176 -> 201        | 0.13921   |           |           |          |              |  |
| 176 -> 204        | 0.16859   |           |           |          |              |  |
| 176 -> 205        | 0.14169   |           |           |          |              |  |
| 176 -> 208        | -0.24549  |           |           |          |              |  |
| 176 -> 225        | -0.11976  |           |           |          |              |  |
| 176 -> 229        | -0.11219  |           |           |          |              |  |
| 176 -> 232        | -0.14480  |           |           |          |              |  |
| 176 -> 233        | 0.15037   |           |           |          |              |  |
| 176 -> 238        | -0.17959  |           |           |          |              |  |
| 176 -> 241        | 0.11102   |           |           |          |              |  |
| 176 -> 245        | -0.12148  |           |           |          |              |  |
| 176 -> 268        | 0.13455   |           |           |          |              |  |
| Excited State 29: | Triplet-A | 5.5272 eV | 224.32 nm | f=0.0000 | <S**2>=2.000 |  |
| 175 -> 177        | 0.23957   |           |           |          |              |  |
| 175 -> 181        | 0.17572   |           |           |          |              |  |
| 175 -> 187        | 0.12658   |           |           |          |              |  |
| 175 -> 195        | -0.18943  |           |           |          |              |  |
| 175 -> 201        | 0.13929   |           |           |          |              |  |
| 175 -> 204        | 0.16868   |           |           |          |              |  |
| 175 -> 205        | 0.14174   |           |           |          |              |  |
| 175 -> 208        | -0.24574  |           |           |          |              |  |

|            |          |
|------------|----------|
| 175 -> 225 | -0.11971 |
| 175 -> 229 | -0.11235 |
| 175 -> 232 | -0.14506 |
| 175 -> 233 | 0.15044  |
| 175 -> 238 | -0.17956 |
| 175 -> 241 | 0.11112  |
| 175 -> 245 | -0.12147 |
| 175 -> 268 | 0.13471  |

|                   |           |           |           |          |              |
|-------------------|-----------|-----------|-----------|----------|--------------|
| Excited State 30: | Triplet-A | 5.6170 eV | 220.73 nm | f=0.0000 | <S**2>=2.000 |
| 174 -> 177        | 0.23932   |           |           |          |              |
| 174 -> 181        | 0.19158   |           |           |          |              |
| 174 -> 187        | 0.12781   |           |           |          |              |
| 174 -> 195        | -0.19682  |           |           |          |              |
| 174 -> 201        | 0.14024   |           |           |          |              |
| 174 -> 204        | 0.17056   |           |           |          |              |
| 174 -> 205        | 0.14149   |           |           |          |              |
| 174 -> 208        | -0.24311  |           |           |          |              |
| 174 -> 225        | -0.12066  |           |           |          |              |
| 174 -> 229        | -0.11117  |           |           |          |              |
| 174 -> 232        | -0.14487  |           |           |          |              |
| 174 -> 233        | 0.14928   |           |           |          |              |
| 174 -> 238        | -0.17933  |           |           |          |              |
| 174 -> 241        | 0.10951   |           |           |          |              |
| 174 -> 245        | -0.12102  |           |           |          |              |
| 174 -> 268        | 0.13303   |           |           |          |              |

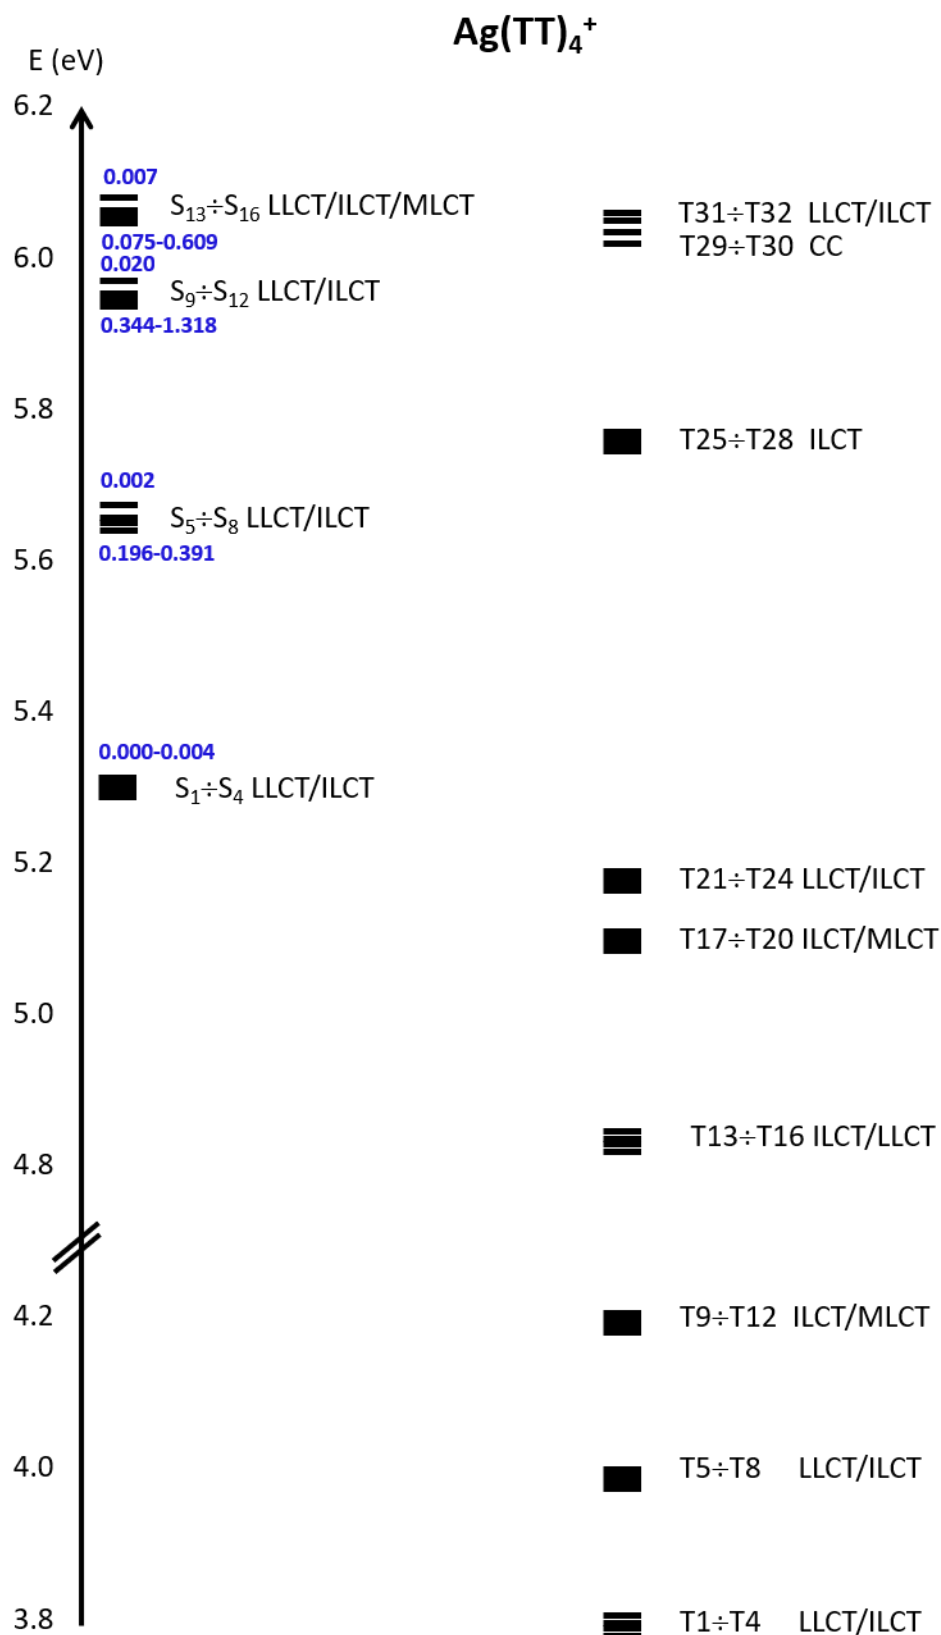

**Figure S30.** Scheme of singlet and triplet electronic levels with oscillator strengths (for singlet states, in blue) and character for model compound Ag(TT)<sub>4</sub><sup>+</sup> at  $\omega$ B97X/def2-TZVP level of theory.

**Ag(TT)<sub>4</sub>: HOMOs**

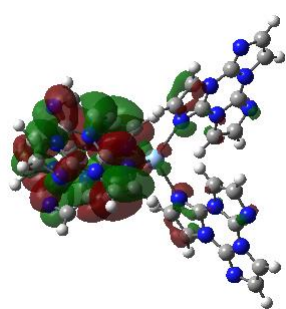

MO = 202 (HOMO-11)

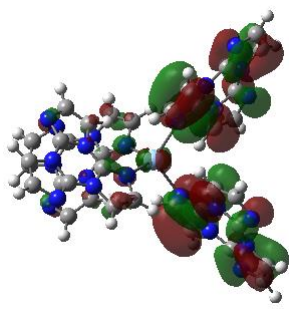

203 (HOMO-10)

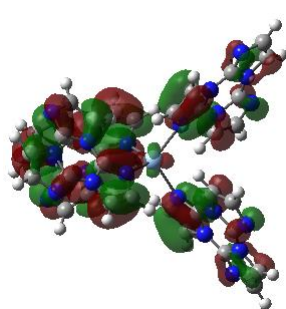

204 (HOMO-9)

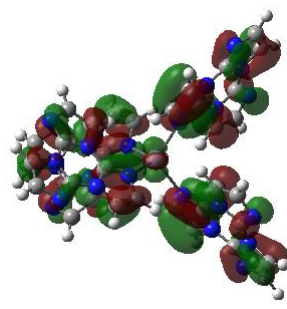

205 (HOMO-8)

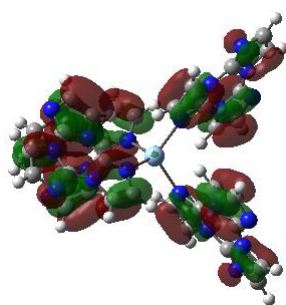

206 (HOMO-7)

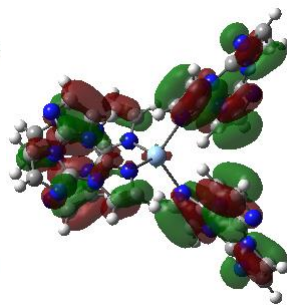

207 (HOMO-6)

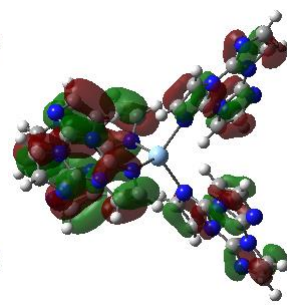

208 (HOMO-5)

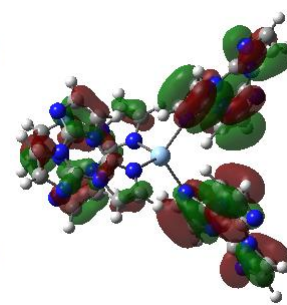

209 (HOMO-4)

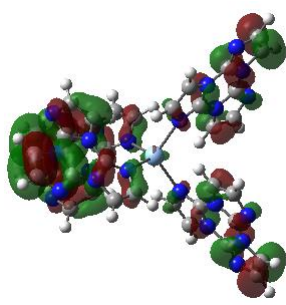

210 (HOMO-3)

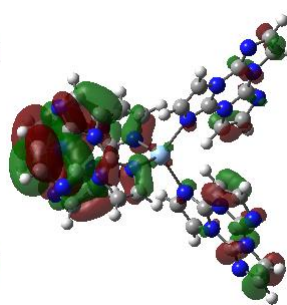

211 (HOMO-2)

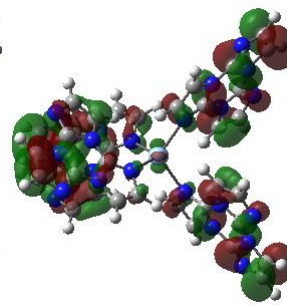

212 (HOMO-1)

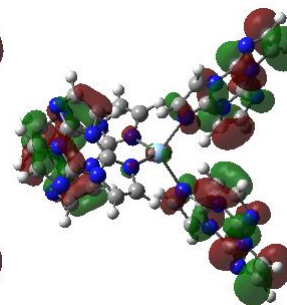

213 (HOMO)

**Ag(TT)<sub>4</sub>: LUMOs**

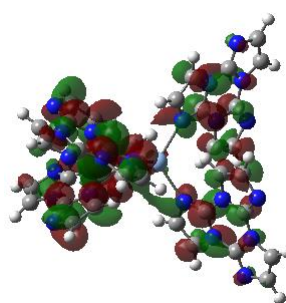

MO = 214 (LUMO)

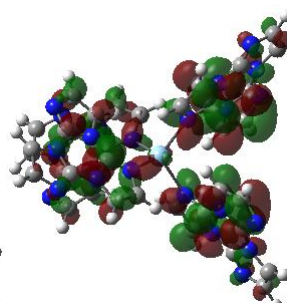

215 (LUMO+1)

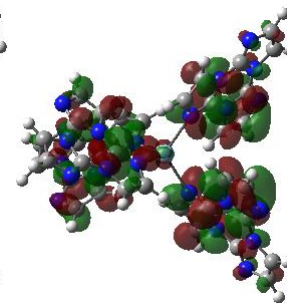

216 (LUMO+2)

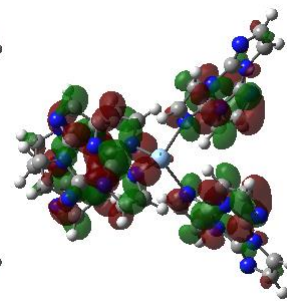

217 (LUMO+3)

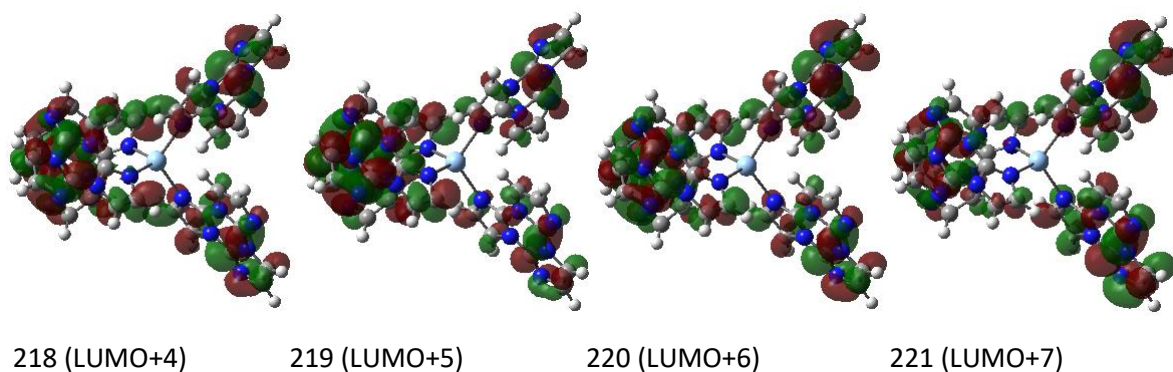

**Figure S31.** Plots of the  $\omega$ B97X/def2-TZVP MOs mainly involved in the lowest energy transitions of  $\text{Ag}(\text{TT})_4^+$  (Isosurfaces value 0.02).

**Table S10.** First TD- $\omega$ B97X/def2-TZVP  $S_0 \rightarrow S_n$  and  $T_0 \rightarrow T_n$  transitions computed for the optimized geometry of  $\text{Ag}(\text{TT})_4^+$ .

Singlets:

|               |        |           |           |           |          |              |
|---------------|--------|-----------|-----------|-----------|----------|--------------|
| Excited State | 1:     | Singlet-A | 5.2985 eV | 234.00 nm | f=0.0000 | <S**2>=0.000 |
|               | 206 -> | 216       | 0.23112   |           |          |              |
|               | 206 -> | 217       | 0.11532   |           |          |              |
|               | 207 -> | 217       | 0.22663   |           |          |              |
|               | 208 -> | 214       | 0.18378   |           |          |              |
|               | 208 -> | 215       | 0.22464   |           |          |              |
|               | 209 -> | 214       | 0.21158   |           |          |              |
|               | 210 -> | 220       | -0.21759  |           |          |              |
|               | 211 -> | 219       | 0.17561   |           |          |              |
|               | 211 -> | 221       | -0.19034  |           |          |              |
|               | 212 -> | 218       | 0.21373   |           |          |              |
|               | 213 -> | 219       | -0.17306  |           |          |              |
| Excited State | 2:     | Singlet-A | 5.3026 eV | 233.82 nm | f=0.0036 | <S**2>=0.000 |
|               | 206 -> | 217       | 0.21956   |           |          |              |
|               | 207 -> | 216       | 0.25860   |           |          |              |
|               | 208 -> | 214       | 0.21778   |           |          |              |
|               | 209 -> | 215       | 0.27808   |           |          |              |
|               | 210 -> | 218       | 0.20725   |           |          |              |
|               | 211 -> | 219       | 0.18008   |           |          |              |
|               | 212 -> | 220       | -0.22059  |           |          |              |
|               | 213 -> | 221       | 0.24685   |           |          |              |
| Excited State | 3:     | Singlet-A | 5.3054 eV | 233.70 nm | f=0.0029 | <S**2>=0.000 |
|               | 206 -> | 214       | 0.13372   |           |          |              |
|               | 206 -> | 215       | -0.16999  |           |          |              |
|               | 207 -> | 214       | -0.15673  |           |          |              |
|               | 207 -> | 215       | 0.24633   |           |          |              |
|               | 208 -> | 216       | -0.11921  |           |          |              |
|               | 208 -> | 217       | 0.11617   |           |          |              |
|               | 209 -> | 216       | 0.25407   |           |          |              |
|               | 209 -> | 217       | -0.19744  |           |          |              |
|               | 210 -> | 219       | 0.11380   |           |          |              |
|               | 210 -> | 221       | 0.15247   |           |          |              |
|               | 212 -> | 219       | -0.11687  |           |          |              |
|               | 212 -> | 221       | -0.20492  |           |          |              |
|               | 213 -> | 218       | 0.19316   |           |          |              |
|               | 213 -> | 220       | 0.20756   |           |          |              |
| Excited State | 4:     | Singlet-A | 5.3073 eV | 233.61 nm | f=0.0019 | <S**2>=0.000 |
|               | 206 -> | 214       | 0.23433   |           |          |              |
|               | 206 -> | 215       | 0.16773   |           |          |              |
|               | 207 -> | 214       | 0.19288   |           |          |              |
|               | 207 -> | 215       | 0.11106   |           |          |              |
|               | 208 -> | 216       | 0.21342   |           |          |              |
|               | 208 -> | 217       | 0.23766   |           |          |              |
|               | 209 -> | 217       | 0.14007   |           |          |              |
|               | 210 -> | 219       | 0.19108   |           |          |              |
|               | 210 -> | 221       | -0.13455  |           |          |              |
|               | 211 -> | 218       | 0.20271   |           |          |              |
|               | 211 -> | 220       | -0.19827  |           |          |              |
|               | 212 -> | 219       | 0.16875   |           |          |              |
|               | 213 -> | 218       | -0.11096  |           |          |              |
| Excited State | 5:     | Singlet-A | 5.6429 eV | 219.72 nm | f=0.1963 | <S**2>=0.000 |

|               |          |           |           |           |          |              |
|---------------|----------|-----------|-----------|-----------|----------|--------------|
| 210 -> 214    | 0.31095  |           |           |           |          |              |
| 210 -> 215    | 0.16098  |           |           |           |          |              |
| 211 -> 216    | 0.23968  |           |           |           |          |              |
| 211 -> 217    | 0.33015  |           |           |           |          |              |
| 212 -> 214    | 0.20395  |           |           |           |          |              |
| 212 -> 215    | 0.20454  |           |           |           |          |              |
| 213 -> 216    | -0.17593 |           |           |           |          |              |
| 213 -> 217    | -0.10820 |           |           |           |          |              |
|               |          |           |           |           |          |              |
| Excited State | 6:       | Singlet-A | 5.6452 eV | 219.63 nm | f=0.2647 | <S**2>=0.000 |
| 210 -> 214    | -0.11417 |           |           |           |          |              |
| 210 -> 215    | 0.25661  |           |           |           |          |              |
| 211 -> 216    | 0.18942  |           |           |           |          |              |
| 212 -> 214    | 0.23966  |           |           |           |          |              |
| 212 -> 215    | -0.26017 |           |           |           |          |              |
| 213 -> 216    | 0.29841  |           |           |           |          |              |
| 213 -> 217    | -0.27785 |           |           |           |          |              |
|               |          |           |           |           |          |              |
| Excited State | 7:       | Singlet-A | 5.6632 eV | 218.93 nm | f=0.3908 | <S**2>=0.000 |
| 210 -> 216    | 0.30239  |           |           |           |          |              |
| 211 -> 214    | 0.15420  |           |           |           |          |              |
| 211 -> 215    | 0.27585  |           |           |           |          |              |
| 212 -> 217    | 0.30368  |           |           |           |          |              |
| 213 -> 214    | -0.29026 |           |           |           |          |              |
| 213 -> 215    | 0.17393  |           |           |           |          |              |
|               |          |           |           |           |          |              |
| Excited State | 8:       | Singlet-A | 5.6879 eV | 217.98 nm | f=0.0022 | <S**2>=0.000 |
| 206 -> 218    | -0.11797 |           |           |           |          |              |
| 207 -> 220    | 0.11951  |           |           |           |          |              |
| 208 -> 219    | -0.13034 |           |           |           |          |              |
| 209 -> 221    | 0.12589  |           |           |           |          |              |
| 210 -> 217    | 0.29237  |           |           |           |          |              |
| 211 -> 214    | 0.31325  |           |           |           |          |              |
| 212 -> 216    | 0.30024  |           |           |           |          |              |
| 213 -> 215    | -0.29560 |           |           |           |          |              |
|               |          |           |           |           |          |              |
| Excited State | 9:       | Singlet-A | 5.9362 eV | 208.86 nm | f=0.3445 | <S**2>=0.000 |
| 206 -> 214    | 0.14988  |           |           |           |          |              |
| 206 -> 219    | -0.14420 |           |           |           |          |              |
| 206 -> 221    | 0.16754  |           |           |           |          |              |
| 207 -> 215    | 0.11022  |           |           |           |          |              |
| 207 -> 219    | -0.18245 |           |           |           |          |              |
| 208 -> 217    | 0.12466  |           |           |           |          |              |
| 208 -> 218    | -0.16851 |           |           |           |          |              |
| 208 -> 220    | 0.22691  |           |           |           |          |              |
| 209 -> 216    | 0.11966  |           |           |           |          |              |
| 209 -> 218    | -0.18228 |           |           |           |          |              |
| 210 -> 219    | -0.21752 |           |           |           |          |              |
| 211 -> 218    | -0.17792 |           |           |           |          |              |
| 211 -> 220    | 0.10806  |           |           |           |          |              |
| 212 -> 221    | 0.17953  |           |           |           |          |              |
| 213 -> 220    | -0.12142 |           |           |           |          |              |
|               |          |           |           |           |          |              |
| Excited State | 10:      | Singlet-A | 5.9441 eV | 208.58 nm | f=1.3181 | <S**2>=0.000 |
| 206 -> 217    | -0.14678 |           |           |           |          |              |
| 206 -> 220    | -0.15045 |           |           |           |          |              |
| 207 -> 216    | -0.16606 |           |           |           |          |              |
| 207 -> 218    | 0.15138  |           |           |           |          |              |
| 208 -> 214    | -0.14861 |           |           |           |          |              |
| 208 -> 221    | -0.18807 |           |           |           |          |              |
| 209 -> 215    | -0.16132 |           |           |           |          |              |
| 209 -> 219    | 0.18515  |           |           |           |          |              |
| 210 -> 218    | 0.22141  |           |           |           |          |              |
| 211 -> 219    | 0.16883  |           |           |           |          |              |
| 212 -> 220    | -0.21692 |           |           |           |          |              |
| 213 -> 221    | 0.19627  |           |           |           |          |              |
|               |          |           |           |           |          |              |
| Excited State | 11:      | Singlet-A | 5.9467 eV | 208.49 nm | f=0.4917 | <S**2>=0.000 |
| 206 -> 215    | 0.11907  |           |           |           |          |              |
| 206 -> 219    | -0.16574 |           |           |           |          |              |
| 207 -> 214    | 0.10828  |           |           |           |          |              |
| 207 -> 221    | 0.22300  |           |           |           |          |              |
| 208 -> 216    | 0.11693  |           |           |           |          |              |
| 208 -> 218    | -0.19788 |           |           |           |          |              |
| 209 -> 217    | 0.14253  |           |           |           |          |              |
| 209 -> 218    | 0.12721  |           |           |           |          |              |
| 209 -> 220    | 0.23366  |           |           |           |          |              |
| 210 -> 221    | 0.19184  |           |           |           |          |              |



|                   |           |           |           |          |              |
|-------------------|-----------|-----------|-----------|----------|--------------|
| 211 -> 220        | 0.11606   |           |           |          |              |
| 212 -> 219        | -0.17537  |           |           |          |              |
| 212 -> 221        | -0.12403  |           |           |          |              |
| 213 -> 218        | 0.16488   |           |           |          |              |
| 213 -> 220        | 0.12172   |           |           |          |              |
|                   |           |           |           |          |              |
| Excited State 12: | Singlet-A | 5.9687 eV | 207.72 nm | f=0.0202 | <S**2>=0.000 |
| 202 -> 214        | -0.14997  |           |           |          |              |
| 203 -> 215        | 0.14239   |           |           |          |              |
| 204 -> 217        | -0.15629  |           |           |          |              |
| 205 -> 216        | 0.15540   |           |           |          |              |
| 206 -> 216        | -0.18476  |           |           |          |              |
| 207 -> 217        | -0.17108  |           |           |          |              |
| 208 -> 214        | -0.11525  |           |           |          |              |
| 208 -> 215        | -0.15973  |           |           |          |              |
| 209 -> 214        | -0.16458  |           |           |          |              |
| 210 -> 220        | -0.21858  |           |           |          |              |
| 211 -> 219        | 0.14397   |           |           |          |              |
| 211 -> 221        | -0.18594  |           |           |          |              |
| 212 -> 218        | 0.22487   |           |           |          |              |
| 213 -> 219        | -0.17640  |           |           |          |              |
| 213 -> 221        | -0.10578  |           |           |          |              |
|                   |           |           |           |          |              |
| Excited State 13: | Singlet-A | 6.0464 eV | 205.05 nm | f=0.0753 | <S**2>=0.000 |
| 202 -> 214        | 0.12641   |           |           |          |              |
| 202 -> 215        | 0.15920   |           |           |          |              |
| 203 -> 214        | -0.16774  |           |           |          |              |
| 203 -> 215        | 0.13239   |           |           |          |              |
| 204 -> 216        | 0.20502   |           |           |          |              |
| 205 -> 217        | -0.20185  |           |           |          |              |
| 206 -> 220        | -0.22663  |           |           |          |              |
| 207 -> 218        | 0.25585   |           |           |          |              |
| 208 -> 219        | 0.10912   |           |           |          |              |
| 208 -> 221        | -0.18507  |           |           |          |              |
| 209 -> 219        | 0.18952   |           |           |          |              |
| 209 -> 221        | 0.12323   |           |           |          |              |
|                   |           |           |           |          |              |
| Excited State 14: | Singlet-A | 6.0524 eV | 204.85 nm | f=0.5693 | <S**2>=0.000 |
| 202 -> 216        | -0.19584  |           |           |          |              |
| 202 -> 217        | -0.16689  |           |           |          |              |
| 203 -> 217        | 0.13593   |           |           |          |              |
| 204 -> 214        | -0.14860  |           |           |          |              |
| 204 -> 215        | -0.19456  |           |           |          |              |
| 205 -> 214        | 0.21172   |           |           |          |              |
| 206 -> 219        | -0.14733  |           |           |          |              |
| 206 -> 221        | 0.15414   |           |           |          |              |
| 207 -> 219        | -0.17478  |           |           |          |              |
| 208 -> 217        | -0.10126  |           |           |          |              |
| 208 -> 218        | -0.14669  |           |           |          |              |
| 208 -> 220        | 0.18649   |           |           |          |              |
| 209 -> 218        | -0.15762  |           |           |          |              |
| 211 -> 218        | 0.14543   |           |           |          |              |
| 213 -> 220        | 0.12834   |           |           |          |              |
|                   |           |           |           |          |              |
| Excited State 15: | Singlet-A | 6.0595 eV | 204.61 nm | f=0.6095 | <S**2>=0.000 |
| 202 -> 217        | -0.14315  |           |           |          |              |
| 203 -> 216        | 0.22904   |           |           |          |              |
| 203 -> 217        | -0.13137  |           |           |          |              |
| 204 -> 214        | -0.19109  |           |           |          |              |
| 205 -> 215        | 0.24162   |           |           |          |              |
| 206 -> 219        | -0.13192  |           |           |          |              |
| 207 -> 214        | -0.10115  |           |           |          |              |
| 207 -> 221        | 0.19681   |           |           |          |              |
| 208 -> 218        | -0.13417  |           |           |          |              |
| 209 -> 218        | 0.15522   |           |           |          |              |
| 209 -> 220        | 0.18404   |           |           |          |              |
| 211 -> 220        | -0.13145  |           |           |          |              |
| 213 -> 218        | -0.14636  |           |           |          |              |
|                   |           |           |           |          |              |
| Excited State 16: | Singlet-A | 6.0918 eV | 203.53 nm | f=0.0069 | <S**2>=0.000 |
| 202 -> 214        | 0.16404   |           |           |          |              |
| 203 -> 215        | -0.15758  |           |           |          |              |
| 204 -> 217        | 0.16424   |           |           |          |              |
| 205 -> 216        | -0.17102  |           |           |          |              |
| 206 -> 218        | 0.26071   |           |           |          |              |
| 207 -> 220        | -0.24824  |           |           |          |              |
| 208 -> 219        | 0.26621   |           |           |          |              |
| 209 -> 221        | -0.25508  |           |           |          |              |

Triplets:

Excited State 1: Triplet-A 3.7593 eV 329.81 nm f=0.0000 <S\*\*2>=2.000  
206 -> 216 0.16821  
207 -> 216 -0.15727  
207 -> 217 0.18792  
208 -> 215 0.12974  
209 -> 214 0.16616  
209 -> 215 -0.19243  
210 -> 220 -0.16136  
211 -> 221 -0.12897  
212 -> 218 0.17674  
212 -> 220 0.12973  
213 -> 215 0.13974  
213 -> 219 -0.17100  
213 -> 221 -0.19951

Excited State 2: Triplet-A 3.7595 eV 329.79 nm f=0.0000 <S\*\*2>=2.000  
206 -> 215 -0.15161  
207 -> 214 -0.14151  
207 -> 215 0.19806  
209 -> 216 0.19741  
209 -> 217 -0.16987  
210 -> 221 0.15593  
212 -> 219 -0.13335  
212 -> 221 -0.18594  
213 -> 216 -0.12609  
213 -> 217 0.12186  
213 -> 218 0.17476  
213 -> 220 0.18337

Excited State 3: Triplet-A 3.7630 eV 329.48 nm f=0.0000 <S\*\*2>=2.000  
206 -> 216 0.11503  
206 -> 217 0.20492  
207 -> 216 0.15321  
207 -> 217 0.10216  
208 -> 214 0.21995  
208 -> 215 0.11924  
209 -> 215 0.11816  
210 -> 218 0.19558  
210 -> 220 -0.12744  
211 -> 214 -0.12193  
211 -> 219 0.23133  
211 -> 221 -0.12577  
212 -> 218 0.10373  
212 -> 220 -0.16090  
213 -> 214 0.10475  
213 -> 221 0.11635

Excited State 4: Triplet-A 3.7649 eV 329.32 nm f=0.0000 <S\*\*2>=2.000  
206 -> 214 0.20235  
206 -> 215 0.12869  
207 -> 214 0.14914  
207 -> 215 0.10736  
208 -> 216 0.15839  
208 -> 217 0.19721  
210 -> 219 0.19310  
210 -> 221 -0.12599  
211 -> 218 0.20721  
211 -> 220 -0.18184  
212 -> 219 0.15464  
212 -> 221 -0.11417

Excited State 5: Triplet-A 3.9824 eV 311.33 nm f=0.0000 <S\*\*2>=2.000  
205 -> 221 -0.10061  
206 -> 221 -0.12277  
207 -> 219 0.11412  
207 -> 221 0.15034  
208 -> 220 -0.11819  
209 -> 218 0.16092  
209 -> 220 0.15492  
210 -> 221 0.12655  
212 -> 221 -0.16440  
213 -> 216 0.11921  
213 -> 218 0.13024  
213 -> 220 0.14406

|               |     |           |           |           |          |              |
|---------------|-----|-----------|-----------|-----------|----------|--------------|
| Excited State | 6:  | Triplet-A | 3.9826 eV | 311.31 nm | f=0.0000 | <S**2>=2.000 |
| 203 -> 221    |     | -0.11747  |           |           |          |              |
| 206 -> 220    |     | -0.12443  |           |           |          |              |
| 207 -> 218    |     | 0.14897   |           |           |          |              |
| 207 -> 220    |     | 0.10940   |           |           |          |              |
| 208 -> 221    |     | -0.15007  |           |           |          |              |
| 209 -> 219    |     | 0.15008   |           |           |          |              |
| 209 -> 221    |     | 0.16707   |           |           |          |              |
| 210 -> 218    |     | 0.12717   |           |           |          |              |
| 212 -> 218    |     | -0.10766  |           |           |          |              |
| 212 -> 220    |     | -0.15395  |           |           |          |              |
| 213 -> 214    |     | -0.11672  |           |           |          |              |
| 213 -> 215    |     | 0.11630   |           |           |          |              |
| 213 -> 221    |     | 0.16889   |           |           |          |              |
|               |     |           |           |           |          |              |
| Excited State | 7:  | Triplet-A | 3.9851 eV | 311.12 nm | f=0.0000 | <S**2>=2.000 |
| 206 -> 218    |     | 0.11621   |           |           |          |              |
| 206 -> 219    |     | 0.11832   |           |           |          |              |
| 208 -> 218    |     | 0.13302   |           |           |          |              |
| 208 -> 219    |     | 0.13477   |           |           |          |              |
| 208 -> 220    |     | -0.10910  |           |           |          |              |
| 210 -> 219    |     | 0.11524   |           |           |          |              |
| 210 -> 220    |     | -0.10958  |           |           |          |              |
| 211 -> 214    |     | 0.10009   |           |           |          |              |
| 211 -> 217    |     | 0.10394   |           |           |          |              |
| 211 -> 219    |     | 0.10806   |           |           |          |              |
|               |     |           |           |           |          |              |
| Excited State | 8:  | Triplet-A | 3.9853 eV | 311.10 nm | f=0.0000 | <S**2>=2.000 |
| 206 -> 218    |     | -0.11714  |           |           |          |              |
| 206 -> 219    |     | 0.10642   |           |           |          |              |
| 208 -> 218    |     | 0.12928   |           |           |          |              |
| 208 -> 219    |     | -0.15258  |           |           |          |              |
| 208 -> 220    |     | -0.10658  |           |           |          |              |
| 210 -> 220    |     | 0.10419   |           |           |          |              |
| 211 -> 219    |     | -0.10485  |           |           |          |              |
|               |     |           |           |           |          |              |
| Excited State | 9:  | Triplet-A | 4.1975 eV | 295.37 nm | f=0.0000 | <S**2>=2.000 |
| 202 -> 216    |     | 0.16498   |           |           |          |              |
| 202 -> 217    |     | 0.16294   |           |           |          |              |
| 203 -> 217    |     | -0.11654  |           |           |          |              |
| 204 -> 214    |     | 0.12499   |           |           |          |              |
| 204 -> 215    |     | 0.17753   |           |           |          |              |
| 204 -> 219    |     | 0.10087   |           |           |          |              |
| 205 -> 214    |     | -0.16993  |           |           |          |              |
| 206 -> 214    |     | 0.14885   |           |           |          |              |
| 207 -> 215    |     | 0.12628   |           |           |          |              |
| 208 -> 217    |     | 0.17330   |           |           |          |              |
| 209 -> 216    |     | 0.11454   |           |           |          |              |
|               |     |           |           |           |          |              |
| Excited State | 10: | Triplet-A | 4.1982 eV | 295.33 nm | f=0.0000 | <S**2>=2.000 |
| 202 -> 217    |     | -0.11541  |           |           |          |              |
| 203 -> 216    |     | 0.17624   |           |           |          |              |
| 203 -> 217    |     | -0.10317  |           |           |          |              |
| 203 -> 218    |     | 0.11374   |           |           |          |              |
| 204 -> 214    |     | -0.15077  |           |           |          |              |
| 205 -> 215    |     | 0.19245   |           |           |          |              |
| 206 -> 215    |     | -0.12813  |           |           |          |              |
| 207 -> 214    |     | -0.12593  |           |           |          |              |
| 207 -> 221    |     | 0.10341   |           |           |          |              |
| 208 -> 216    |     | -0.11432  |           |           |          |              |
| 209 -> 217    |     | -0.12724  |           |           |          |              |
| 209 -> 220    |     | 0.10169   |           |           |          |              |
|               |     |           |           |           |          |              |
| Excited State | 11: | Triplet-A | 4.1984 eV | 295.31 nm | f=0.0000 | <S**2>=2.000 |
| 202 -> 215    |     | 0.14632   |           |           |          |              |
| 203 -> 214    |     | -0.15042  |           |           |          |              |
| 203 -> 215    |     | 0.11034   |           |           |          |              |
| 204 -> 216    |     | 0.16975   |           |           |          |              |
| 205 -> 217    |     | -0.16907  |           |           |          |              |
| 206 -> 217    |     | 0.13024   |           |           |          |              |
| 207 -> 216    |     | 0.13354   |           |           |          |              |
| 207 -> 218    |     | 0.12271   |           |           |          |              |
| 208 -> 214    |     | 0.14628   |           |           |          |              |
| 209 -> 215    |     | 0.15444   |           |           |          |              |
|               |     |           |           |           |          |              |
| Excited State | 12: | Triplet-A | 4.1994 eV | 295.24 nm | f=0.0000 | <S**2>=2.000 |
| 202 -> 214    |     | -0.18511  |           |           |          |              |
| 203 -> 215    |     | 0.17223   |           |           |          |              |

|                   |           |           |           |          |              |  |
|-------------------|-----------|-----------|-----------|----------|--------------|--|
| 204 -> 217        | -0.19386  |           |           |          |              |  |
| 205 -> 216        | 0.17904   |           |           |          |              |  |
| 205 -> 218        | 0.10578   |           |           |          |              |  |
| 206 -> 216        | -0.13054  |           |           |          |              |  |
| 206 -> 218        | -0.12116  |           |           |          |              |  |
| 207 -> 217        | -0.13103  |           |           |          |              |  |
| 207 -> 220        | 0.11127   |           |           |          |              |  |
| 208 -> 215        | -0.15253  |           |           |          |              |  |
| 209 -> 214        | -0.14211  |           |           |          |              |  |
|                   |           |           |           |          |              |  |
| Excited State 13: | Triplet-A | 4.8214 eV | 257.15 nm | f=0.0000 | <S**2>=2.000 |  |
| 203 -> 228        | -0.11873  |           |           |          |              |  |
| 207 -> 216        | -0.10087  |           |           |          |              |  |
| 209 -> 215        | -0.13248  |           |           |          |              |  |
| 209 -> 221        | 0.10359   |           |           |          |              |  |
| 210 -> 216        | -0.11320  |           |           |          |              |  |
| 210 -> 217        | 0.10733   |           |           |          |              |  |
| 212 -> 216        | 0.15876   |           |           |          |              |  |
| 212 -> 217        | -0.11977  |           |           |          |              |  |
| 213 -> 214        | 0.12322   |           |           |          |              |  |
| 213 -> 215        | -0.18118  |           |           |          |              |  |
|                   |           |           |           |          |              |  |
| Excited State 14: | Triplet-A | 4.8217 eV | 257.14 nm | f=0.0000 | <S**2>=2.000 |  |
| 203 -> 218        | 0.10025   |           |           |          |              |  |
| 205 -> 228        | -0.10127  |           |           |          |              |  |
| 207 -> 215        | -0.10007  |           |           |          |              |  |
| 209 -> 216        | -0.13744  |           |           |          |              |  |
| 209 -> 217        | 0.11523   |           |           |          |              |  |
| 210 -> 215        | -0.12543  |           |           |          |              |  |
| 212 -> 214        | -0.11276  |           |           |          |              |  |
| 212 -> 215        | 0.16000   |           |           |          |              |  |
| 213 -> 216        | -0.17161  |           |           |          |              |  |
| 213 -> 217        | 0.13118   |           |           |          |              |  |
|                   |           |           |           |          |              |  |
| Excited State 15: | Triplet-A | 4.8232 eV | 257.06 nm | f=0.0000 | <S**2>=2.000 |  |
| 202 -> 229        | 0.11696   |           |           |          |              |  |
| 208 -> 214        | -0.13591  |           |           |          |              |  |
| 210 -> 216        | -0.12628  |           |           |          |              |  |
| 210 -> 217        | -0.14120  |           |           |          |              |  |
| 211 -> 214        | -0.16752  |           |           |          |              |  |
| 211 -> 215        | -0.12981  |           |           |          |              |  |
| 212 -> 217        | -0.11769  |           |           |          |              |  |
|                   |           |           |           |          |              |  |
| Excited State 16: | Triplet-A | 4.8239 eV | 257.02 nm | f=0.0000 | <S**2>=2.000 |  |
| 202 -> 218        | -0.10251  |           |           |          |              |  |
| 202 -> 227        | 0.10015   |           |           |          |              |  |
| 204 -> 229        | -0.10468  |           |           |          |              |  |
| 208 -> 216        | 0.11155   |           |           |          |              |  |
| 208 -> 217        | 0.11319   |           |           |          |              |  |
| 208 -> 218        | -0.11138  |           |           |          |              |  |
| 210 -> 214        | 0.15184   |           |           |          |              |  |
| 210 -> 215        | 0.10397   |           |           |          |              |  |
| 211 -> 216        | 0.13441   |           |           |          |              |  |
| 211 -> 217        | 0.15218   |           |           |          |              |  |
| 212 -> 214        | 0.13671   |           |           |          |              |  |
|                   |           |           |           |          |              |  |
| Excited State 17: | Triplet-A | 5.0934 eV | 243.42 nm | f=0.0000 | <S**2>=2.000 |  |
| 202 -> 214        | -0.12171  |           |           |          |              |  |
| 202 -> 219        | 0.10177   |           |           |          |              |  |
| 210 -> 217        | 0.11565   |           |           |          |              |  |
| 211 -> 214        | 0.14196   |           |           |          |              |  |
|                   |           |           |           |          |              |  |
| Excited State 18: | Triplet-A | 5.0938 eV | 243.40 nm | f=0.0000 | <S**2>=2.000 |  |
| 202 -> 218        | 0.10722   |           |           |          |              |  |
| 204 -> 219        | 0.10269   |           |           |          |              |  |
| 206 -> 229        | 0.10240   |           |           |          |              |  |
| 208 -> 227        | -0.12380  |           |           |          |              |  |
| 211 -> 216        | 0.11512   |           |           |          |              |  |
| 211 -> 217        | 0.11704   |           |           |          |              |  |
| 212 -> 214        | 0.10410   |           |           |          |              |  |
|                   |           |           |           |          |              |  |
| Excited State 19: | Triplet-A | 5.0957 eV | 243.31 nm | f=0.0000 | <S**2>=2.000 |  |
| 203 -> 216        | -0.13852  |           |           |          |              |  |
| 203 -> 217        | 0.10301   |           |           |          |              |  |
| 205 -> 215        | -0.12596  |           |           |          |              |  |
| 205 -> 219        | 0.10136   |           |           |          |              |  |
| 207 -> 229        | -0.10673  |           |           |          |              |  |
| 209 -> 227        | 0.12992   |           |           |          |              |  |

|                   |           |           |           |          |              |
|-------------------|-----------|-----------|-----------|----------|--------------|
| 210 -> 214        | -0.10400  |           |           |          |              |
| 212 -> 215        | -0.13308  |           |           |          |              |
| 213 -> 216        | 0.15087   |           |           |          |              |
| 213 -> 218        | 0.12537   |           |           |          |              |
| Excited State 20: | Triplet-A | 5.0958 eV | 243.31 nm | f=0.0000 | <S**2>=2.000 |
| 203 -> 215        | -0.12815  |           |           |          |              |
| 203 -> 221        | 0.12384   |           |           |          |              |
| 204 -> 216        | -0.10097  |           |           |          |              |
| 205 -> 217        | 0.11388   |           |           |          |              |
| 209 -> 228        | -0.12557  |           |           |          |              |
| 210 -> 216        | 0.11011   |           |           |          |              |
| 212 -> 217        | 0.10517   |           |           |          |              |
| 212 -> 220        | -0.10628  |           |           |          |              |
| 213 -> 214        | -0.13042  |           |           |          |              |
| 213 -> 215        | 0.13590   |           |           |          |              |
| 213 -> 221        | 0.12657   |           |           |          |              |
| Excited State 21: | Triplet-A | 5.1654 eV | 240.03 nm | f=0.0000 | <S**2>=2.000 |
| 202 -> 216        | 0.12811   |           |           |          |              |
| 202 -> 217        | 0.15003   |           |           |          |              |
| 204 -> 214        | 0.13204   |           |           |          |              |
| 204 -> 215        | 0.10463   |           |           |          |              |
| 205 -> 214        | -0.10823  |           |           |          |              |
| 206 -> 219        | -0.14959  |           |           |          |              |
| 206 -> 221        | 0.11456   |           |           |          |              |
| 207 -> 219        | -0.12534  |           |           |          |              |
| 208 -> 218        | -0.11722  |           |           |          |              |
| 208 -> 220        | 0.13715   |           |           |          |              |
| 211 -> 224        | 0.10968   |           |           |          |              |
| 211 -> 227        | 0.11180   |           |           |          |              |
| Excited State 22: | Triplet-A | 5.1663 eV | 239.99 nm | f=0.0000 | <S**2>=2.000 |
| 203 -> 216        | 0.14676   |           |           |          |              |
| 203 -> 217        | -0.10737  |           |           |          |              |
| 205 -> 215        | 0.13976   |           |           |          |              |
| 206 -> 221        | 0.11104   |           |           |          |              |
| 207 -> 221        | -0.16509  |           |           |          |              |
| 209 -> 218        | -0.12412  |           |           |          |              |
| 209 -> 220        | -0.14461  |           |           |          |              |
| 213 -> 224        | 0.11858   |           |           |          |              |
| 213 -> 227        | -0.11356  |           |           |          |              |
| Excited State 23: | Triplet-A | 5.1665 eV | 239.98 nm | f=0.0000 | <S**2>=2.000 |
| 202 -> 214        | 0.15728   |           |           |          |              |
| 204 -> 217        | 0.14619   |           |           |          |              |
| 205 -> 216        | -0.11152  |           |           |          |              |
| 206 -> 218        | -0.13520  |           |           |          |              |
| 207 -> 220        | 0.13006   |           |           |          |              |
| 208 -> 219        | -0.16734  |           |           |          |              |
| 210 -> 227        | 0.10829   |           |           |          |              |
| Excited State 24: | Triplet-A | 5.1676 eV | 239.93 nm | f=0.0000 | <S**2>=2.000 |
| 203 -> 214        | -0.12356  |           |           |          |              |
| 203 -> 215        | 0.13831   |           |           |          |              |
| 204 -> 216        | 0.11752   |           |           |          |              |
| 205 -> 216        | 0.10285   |           |           |          |              |
| 205 -> 217        | -0.12160  |           |           |          |              |
| 206 -> 220        | 0.12814   |           |           |          |              |
| 207 -> 218        | -0.13996  |           |           |          |              |
| 207 -> 220        | -0.10220  |           |           |          |              |
| 208 -> 221        | 0.10808   |           |           |          |              |
| 209 -> 219        | -0.12554  |           |           |          |              |
| 209 -> 221        | -0.14805  |           |           |          |              |
| 212 -> 227        | 0.11092   |           |           |          |              |
| 213 -> 229        | 0.11456   |           |           |          |              |
| Excited State 25: | Triplet-A | 5.7542 eV | 215.47 nm | f=0.0000 | <S**2>=2.000 |
| 211 -> 239        | 0.11963   |           |           |          |              |
| 211 -> 243        | -0.11071  |           |           |          |              |
| Excited State 26: | Triplet-A | 5.7545 eV | 215.46 nm | f=0.0000 | <S**2>=2.000 |
| 208 -> 237        | 0.10293   |           |           |          |              |
| 211 -> 243        | 0.11647   |           |           |          |              |
| Excited State 27: | Triplet-A | 5.7552 eV | 215.43 nm | f=0.0000 | <S**2>=2.000 |
| 182 -> 221        | 0.10751   |           |           |          |              |
| 204 -> 229        | -0.10182  |           |           |          |              |

|                   |           |           |           |          |              |
|-------------------|-----------|-----------|-----------|----------|--------------|
| 206 -> 237        | 0.10254   |           |           |          |              |
| 207 -> 235        | -0.11387  |           |           |          |              |
| 209 -> 231        | -0.12259  |           |           |          |              |
| 210 -> 243        | 0.12649   |           |           |          |              |
| 212 -> 215        | -0.10590  |           |           |          |              |
| 212 -> 241        | -0.14977  |           |           |          |              |
| 213 -> 216        | 0.11304   |           |           |          |              |
| 213 -> 239        | 0.11840   |           |           |          |              |
|                   |           |           |           |          |              |
| Excited State 28: | Triplet-A | 5.7563 eV | 215.39 nm | f=0.0000 | <S**2>=2.000 |
| 183 -> 221        | 0.10982   |           |           |          |              |
| 203 -> 229        | 0.10483   |           |           |          |              |
| 205 -> 227        | -0.10575  |           |           |          |              |
| 206 -> 231        | -0.10029  |           |           |          |              |
| 209 -> 232        | -0.10424  |           |           |          |              |
| 209 -> 235        | 0.12563   |           |           |          |              |
| 213 -> 215        | -0.10463  |           |           |          |              |
| 213 -> 241        | -0.15444  |           |           |          |              |
| 213 -> 243        | -0.10058  |           |           |          |              |
|                   |           |           |           |          |              |
| Excited State 29: | Triplet-A | 6.0228 eV | 205.86 nm | f=0.0000 | <S**2>=2.000 |
| 201 -> 222        | -0.35075  |           |           |          |              |
| 201 -> 230        | 0.20481   |           |           |          |              |
|                   |           |           |           |          |              |
| Excited State 30: | Triplet-A | 6.0368 eV | 205.38 nm | f=0.0000 | <S**2>=2.000 |
| 200 -> 222        | 0.30115   |           |           |          |              |
| 200 -> 230        | -0.17995  |           |           |          |              |
| 208 -> 214        | 0.10771   |           |           |          |              |
| 210 -> 218        | -0.10699  |           |           |          |              |
| 211 -> 219        | -0.10844  |           |           |          |              |
|                   |           |           |           |          |              |
| Excited State 31: | Triplet-A | 6.0513 eV | 204.89 nm | f=0.0000 | <S**2>=2.000 |
| 203 -> 215        | 0.14048   |           |           |          |              |
| 205 -> 216        | 0.13277   |           |           |          |              |
| 209 -> 214        | 0.10534   |           |           |          |              |
| 212 -> 218        | -0.11791  |           |           |          |              |
| 213 -> 219        | 0.10056   |           |           |          |              |
| 213 -> 221        | 0.10297   |           |           |          |              |
|                   |           |           |           |          |              |
| Excited State 32: | Triplet-A | 6.0518 eV | 204.87 nm | f=0.0000 | <S**2>=2.000 |
| 202 -> 217        | -0.11816  |           |           |          |              |
| 204 -> 214        | -0.13576  |           |           |          |              |
| 205 -> 215        | 0.11810   |           |           |          |              |
| 206 -> 215        | 0.10466   |           |           |          |              |
| 207 -> 214        | 0.11577   |           |           |          |              |
| 208 -> 216        | 0.11538   |           |           |          |              |
| 210 -> 221        | 0.10055   |           |           |          |              |
| 210 -> 229        | -0.10027  |           |           |          |              |
| 211 -> 220        | 0.11028   |           |           |          |              |
| 211 -> 227        | 0.11563   |           |           |          |              |
| 211 -> 240        | 0.10521   |           |           |          |              |
| 212 -> 219        | -0.11060  |           |           |          |              |
| 213 -> 218        | 0.11625   |           |           |          |              |
|                   |           |           |           |          |              |
| Excited State 33: | Triplet-A | 6.0836 eV | 203.80 nm | f=0.0000 | <S**2>=2.000 |
| 200 -> 222        | -0.41164  |           |           |          |              |
| 200 -> 230        | 0.24084   |           |           |          |              |
| 205 -> 222        | 0.12294   |           |           |          |              |
|                   |           |           |           |          |              |
| Excited State 34: | Triplet-A | 6.0874 eV | 203.67 nm | f=0.0000 | <S**2>=2.000 |
| 201 -> 222        | 0.38424   |           |           |          |              |
| 201 -> 230        | -0.22440  |           |           |          |              |

## 5. References

- [S1] Schubert, D. M.; Natan, D. T.; Wilson, D. C.; Hardcastle, K. I. Facile Synthesis and Structures of Cyclic Triimidazole and Its Boric Acid Adduct. *Cryst. Growth Des.* 2011, **11**, 843-850
- [S2] Lucenti, E.; Cariati, E.; Previtali, A.; Marinotto, D.; Forni, A.; Bold, V.; Kravtsov, V. C.; Fonari, M. S.; Galli, S.; Carlucci, L., Versatility of Cyclic Triimidazole to Assemble 1D, 2D, and 3D Cu(I) Halide Coordination Networks. *Cryst. Growth Des.* 2019, **19**, 1567-1575.
- [S3] Lucenti, E.; Forni, A.; Botta, C.; Giannini, C.; Malpicci, D.; Marinotto, D.; Previtali, A.; Righetto, S.; Cariati, E., Intrinsic and Extrinsic Heavy-Atom Effects on the Multifaceted Emissive Behavior of Cyclic Triimidazole. *Chem. Eur. J.* 2019, **25**, 2452-2456.
- [S4] SADABS 2012. Area detector absorption correction. Bruker AXS Inc., Madison, Wisconsin, USA.
- [S5] Burla, M. C.; Caliandro, R.; Carrozzini, B.; Cascarano, G. L.; Cuocci, C.; Giacovazzo, C.; Mallamo, M.; Mazzone A.; Polidori, G. Crystal structure determination and refinement via SIR2014. *J. Appl. Cryst.* 2015, **48**, 306-309.
- [S6] Sheldrick, G. M. Crystal Structure Refinement with SHELXL. *Acta Crystallogr., Sect. C: Struct. Chem.* 2015, **71**, 3-8.
- [S7] Gaussian 16, Revision A.03, Frisch, M. J.; Trucks, G. W.; Schlegel, H. B.; Scuseria, G. E.; Robb, M. A.; Cheeseman, J. R.; Scalmani, G.; Barone, V.; Petersson, G. A.; Nakatsuji, H.; Li, X.; Caricato, M.; Marenich, A. V.; Bloino, J.; Janesko, B. G.; Gomperts, R.; Mennucci, B.; Hratchian, H. P.; Ortiz, J. V.; Izmaylov, A. F.; Sonnenberg, J. L.; Williams-Young, D.; Ding, F.; Lipparini, F.; Egidi, F.; Goings, J.; Peng, B.; Petrone, A.; Henderson, T.; Ranasinghe, D.; Zakrzewski, V. G.; Gao, J.; Rega, N.; Zheng, G.; Liang, W.; Hada, M.; Ehara, M.; Toyota, K.; Fukuda, R.; Hasegawa, J.; Ishida, M.; Nakajima, T.; Honda, Y.; Kitao, O.; Nakai, H.; Vreven, T.; Throssell, K.; Montgomery, J. A., Jr.; Peralta, J. E.; Ogliaro, F.; Bearpark, M. J.; Heyd, J. J.; Brothers, E. N.; Kudin, K. N.; Staroverov, V. N.; Keith, T. A.; Kobayashi, R.; Normand, J.; Raghavachari, K.; Rendell, A. P.; Burant, J. C.; Iyengar, S. S.; Tomasi, J.; Cossi, M.; Millam, J. M.; Klene, M.; Adamo, C.; Cammi, R.; Ochterski, J. W.; Martin, R. L.; Morokuma, K.; Farkas, O.; Foresman, J. B.; Fox, D. J. Gaussian, Inc., Wallingford CT, 2016.
- [S8] (a) Andrae, D., Häußermann, U., Dolg, M., Stoll, H., Preuß, H., Energy-adjusted ab initio pseudopotentials for the second and third row transition elements, *Theor. Chim. Acta* 1990, **77**, 123-141; (b) Peterson, K. A., Figgen, D., Goll, E., Stoll, H., Dolg, M., Systematically convergent basis sets with relativistic pseudopotentials. II. Small-core pseudopotentials and correlation consistent basis sets for the post-d group 16-18 elements, *J. Chem. Phys.* 2003, **119**, 11113-11123; (c) Weigend, F., Ahlrichs, R., Balanced basis sets of split valence, triple zeta valence and quadruple zeta valence quality for H to Rn: Design and assessment of accuracy, *Phys. Chem. Chem. Phys.* 2005, **7**, 3297.
- [S9] (a) Pritchard, B. P., Altarawy, D., Didier, B., Gibbs, T. D., Windus, T. L., A New Basis Set Exchange: An Open, Up-to-date Resource for the Molecular Sciences Community, *J. Chem. Inf. Model.*, 59, 4814-4820 (2019); (b) Feller, D., The role of databases in support of computational chemistry calculations, *J. Comput. Chem.*, 17, 1571-1586 (1996); (c) Schuchardt, K. L., Didier, B. T., Elsethagen, T., Sun, L., Gurumoorhi, V., Chase, J., Li, J., Windus, T. L., Basis Set Exchange: A Community Database for Computational Sciences, *J. Chem. Inf. Model.*, 47, 1045-1052 (2007).
- [S10] Glukhovtsev, M. N.; Pross, A.; McGrath, M. P.; Radom, L. Extension of Gaussian-2 (G2) Theory to Bromine- and Iodine Containing Molecules: Use of Effective Core Potentials. *J. Chem. Phys.* 1995, **103**, 1878-1885.
- [S11] Chai, J.D.; Head-Gordon, M. Systematic optimization of long-range corrected hybrid density functionals. *J. Chem. Phys.* 2008, **128**, 084106.
- [S12] (a) Lucenti, E.; Forni, A.; Botta, C.; Carlucci, L.; Giannini, C.; Marinotto, D.; Previtali, A.; Righetto, S.; Cariati, E., H-Aggregates Granting Crystallization-Induced Emissive Behavior and Ultralong Phosphorescence from a Pure Organic Molecule. *J. Phys. Chem. Lett.* 2017, **8**, 1894-1898. (b) Lucenti, E.; Forni, A.; Botta, C.; Carlucci, L.; Giannini, C.; Marinotto, D.; Pavanello, A.; Previtali, A.; Righetto, S.; Cariati, E., Cyclic Triimidazole Derivatives: Intriguing Examples of Multiple Emissions and Ultralong Phosphorescence at Room Temperature. *Angew. Chem. Int. Ed.* 2017, **56**, 16302-16307. (c) Lucenti, E.; Forni, A.; Botta, C.; Carlucci, L.; Colombo, A.; Giannini, C.; Marinotto, D.; Previtali, A.; Righetto, S.; Cariati, E., The Effect of Bromo Substituents on the Multifaceted Emissive and Crystal-Packing Features of Cyclic Triimidazole Derivatives. *ChemPhotoChem* 2018, **2**, 801-805. (d) Previtali, A.; Lucenti, E.; Forni, A.; Mauri, L.; Botta, C.; Giannini, C.; Malpicci, D.; Marinotto, D.; Righetto, S.; Cariati, E., Solid State Room Temperature Dual Phosphorescence from 3-(2-Fluoropyridin-4-yl)triimidazo[1,2-a:1',2'-c:1'',2''-e][1,3,5]triazine. *Molecules* 2019, **24**, 2552. (e) Lucenti, E.; Forni, A.; Previtali, A.; Marinotto, D.; Malpicci, D.; Righetto, S.; Giannini, C.; Virgili, T.; Kabacinski, P.; Ganzer, L.; Giovannella, U.; Botta, C.; Cariati, E., Unravelling the intricate photophysical behavior of 3-(pyridin-2-yl)triimidazotriazine AIE and RTP polymorphs. *Chem. Sci.* 2020, **11**, 7599-7608.
- [S13] Keith, T. A. AIMAll, Version 17.11.14, Professional; TK Gristmill Software: Overland Park, KS, 2017, <http://aim.tkgristmill.com>.
